# Supplementary material for: Working strokes produced by curling protofilaments at disassembling microtubule tips can be biochemically tuned and vary with species
Source: eLife. 2022 Dec 29;11:e83225. doi: 10.7554/eLife.83225 (PMC9799970; doi:10.7554/eLife.83225)
Supplement: Figure 4—source data 1. — These source data are provided in an excel spreadsheet. [file elife-83225-fig4-data1.xlsx]

## Sheet: Pulse amplitudes (bovine+Mg)
Date	Filename	Mean Force (pN)	Error Mean Force (pN)	Amplitude (nm)	Baseline Noise σ (nm)	Risetime (s)	Pulling Angle (deg.)	Spring Constant (pN/nm)	Sample Note	Evaluation Comment	[Mg2+]	Wave Quality	Detachment?
2019-10-09	19_1009_075130	0.98358	0.0347	25.01	7.1685	0.27	-165.54	0.0683	Bead #3: Pre-loaded with 2 pN. 1 mM Mg2+. Observed disassembly and detachment.		1	0
2019-10-09	19_1009_074905	1.1557	0.024808	10.897	3.3326	0.235	170.46	0.0683	Bead #2: Pre-loaded with 2 pN. 1 mM Mg2+. Observed disassembly and detachment. Probable multiple MT's at odd angles.		1	1
2019-10-09	19_1009_075343	1.4693	0.042996	1.5956	2.5466	0.02	-179.9	0.0683	Bead #4: Pre-loaded with 2 pN. 1 mM Mg2+. Observed disassembly and detachment.		1	0
2019-10-09	19_1009_075551	1.7861	0.028463	6.0443	2.0044	0.135	-178.96	0.0683	Bead #5: Pre-loaded with 2 pN. 1 mM Mg2+. Observed disassembly and detachment.		1	0
2019-10-09	19_1009_080120	1.4644	0.019535	22.548	2.449	0.44	-179.98	0.0683	Bead #6: Pre-loaded with 2 pN. 6 mM Mg2+. Observed disassembly and detachment.		6	0
2019-10-09	19_1009_081353	1.529	0.095144	25.562	9.9724	0.345	176.11	0.0683	Bead #7: Pre-loaded with 2 pN. 6 mM Mg2+. Observed disassembly and detachment.		6	0
2019-10-09	19_1009_081823	1.8447	0.12273	22.824	6.6082	0.145	176.92	0.0683	Bead #8: Pre-loaded with 2 pN. 6 mM Mg2+. Observed disassembly and detachment.		6	0
2019-10-09	19_1009_082834	1.6164	0.029978	17.195	2.1551	0.065	-175.34	0.0683	Bead #9: Pre-loaded with 2 pN. 6 mM Mg2+. Observed disassembly and detachment.		6	1
2019-10-09	19_1009_083527	1.6105	0.042579	13.003	3.574	0.265	-171.5	0.0683	Bead #10: Pre-loaded with 2 pN. 6 mM Mg2+. Observed disassembly and detachment.		6	1
2019-10-09	19_1009_085612	1.4776	0.011069	9.7375	1.535	0.075	142.04	0.0683	Bead #12: Pre-loaded with 2 pN. 1 mM Mg2+. Observed disassembly and detachment.		1	0
2019-10-09	19_1009_091238	1.1589	0.023731	22.672	6.5429	0.17	177.5	0.0683	Bead #11: Pre-loaded with 2 pN. 6 mM Mg2+. Observed disassembly and detachment.		6	0
2019-10-15	19_1015_010307	0.80433	0.050288	21.005	4.9534	0.2	175.8	0.0683	Bead #3: Pre-loaded with 2 pN. 6 mM Mg2+. Observed disassembly and detachment		6	0
2019-10-15	19_1015_010614	0.78997	0.033224	22.332	4.6893	0.1	-165.92	0.0683	Bead #4: Pre-loaded with 2 pN. 6 mM Mg2+. Observed disassembly and detachment		6	0
2019-10-15	19_1015_011034	1.53	0.062475	28.493	9.5677	0.32	177.53	0.0683	Bead #4: Pre-loaded with 2 pN. 6 mM Mg2+. Observed disassembly and detachment. Orthogonal Pre-load, likely not good wave.		6	0
2019-10-15	19_1015_011204	1.53	0.025882	27.589	3.5127	0.135	-174.33	0.0683	Bead #5: Pre-loaded with 2 pN. 6 mM Mg2+. Observed disassembly and detachment.		6	1
2019-10-15	19_1015_012007	1.4069	0.030745	12.816	3.0657	0.1	176.41	0.0683	Bead #7: Pre-loaded with 2 pN. 1 mM Mg2+.		1	0
2019-10-15	19_1015_012308	1.5345	0.045544	20.59	5.4598	0.085	-176.43	0.0683	Bead #8: Pre-loaded with 2 pN. 1 mM Mg2+.		1	0
2019-10-15	19_1015_012631	1.4266	0.026969	14.574	2.3909	0.24	-177.05	0.0683	Bead #9: Pre-loaded with 2 pN. 1 mM Mg2+.		1	0
2019-10-15	19_1015_013516	1.6038	0.019379	18.86	2.6047	0.205	179.96	0.0683	Bead #10: Pre-loaded with 2 pN. 1 mM Mg2+.		1	1
2019-10-15	19_1015_015844	1.1076	0.044479	11.606	4.8127	0.09	176.19	0.0683	Bead #11: Pre-loaded with 2 pN. 1 mM Mg2+.		1	0
2019-10-15	19_1015_020557	1.5211	0.052271	31.881	2.5232	0.14	-179.05	0.0683	Bead #12: Pre-loaded with 2 pN. 6 mM Mg2+.		6	1
2019-10-15	19_1015_021207	1.4632	0.050884	14.258	6.2833	0.225	-173.41	0.0683	Bead #15: Pre-loaded with 2 pN. 6 mM Mg2+.		6	0
2019-10-15	19_1015_125400	1.4813	0.026464	15.428	3.1872	0.165	179.28	0.0683	Bead #1: Pre-loaded with 2 pN. 6 mM Mg2+. Observed disassembly and detachment		6	0
2019-10-15	19_1015_125940	0.91738	0.06895	14.663	8.7938	0.07	-155.98	0.0683	Bead #2: Pre-loaded with 2 pN. 6 mM Mg2+. Observed disassembly and detachment		6	0
2019-10-16	19_1016_011053	1.8082	0.013534	12.002	3.2309	0.18	174.85	0.0347	Bead #8: Pre-loaded with 2 pN. 1 mM Mg2+. Observed disassembly and detachment		1	1
2019-10-16	19_1016_011742	1.7356	0.027678	14.793	5.6072	0.1	-166.02	0.0347	Bead #9: Pre-loaded with 2 pN. 1 mM Mg2+. Observed disassembly and detachment		1	0
2019-10-16	19_1016_012252	1.7703	0.035624	42.038	5.0607	0.125	-173.97	0.0347	Bead #10: Pre-loaded with 2 pN. 1 mM Mg2+. Observed disassembly and detachment		1	1
2019-10-16	19_1016_013411	1.8192	0.10166	11.62	5.3783	0.055	-173.69	0.0347	Bead #11: Pre-loaded with 2 pN. 1 mM Mg2+. Observed disassembly and detachment. Laser likely on when bead detached		1	0
2019-10-16	19_1016_014024	1.7868	0.065096	21.824	4.2508	0.1	-173.31	0.0347	"trash"?		1	1
2019-10-16	19_1016_014728	1.832	0.035193	36.229	4.4538	0.095	177.93	0.0347	Bead #12: Pre-loaded with 2 pN. 1 mM Mg2+. Observed disassembly and detachment.		1	1
2019-10-16	19_1016_015040	1.7502	0.041477	32.849	5.515	0.34	172.37	0.0347	Bead #12: Pre-loaded with 2 pN. 1 mM Mg2+. Observed disassembly and detachment.		1	1
2019-10-16	19_1016_020052	1.7648	0.12567	14.279	6.1509	0.06	-179.16	0.0347	Bead #14: Pre-loaded with 2 pN. 1 mM Mg2+. Observed disassembly and detachment.		1	0
2019-10-16	19_1016_113400	1.7098	0.10629	17.35	6.0483	0.06	-172.86	0.0347	Bead #1: Pre-loaded with 2 pN. 6 mM Mg2+. Observed disassembly and detachment		6	0
2019-10-16	19_1016_113744	1.779	0.0099827	14.77	2.4133	0.08	173.01	0.0347	Bead #2: Pre-loaded with 2 pN. 6 mM Mg2+. Observed disassembly and detachment		6	0
2019-10-16	19_1016_115038	1.7647	0.019733	36.097	6.4873	0.31	177.78	0.0347	Bead #4: Pre-loaded with 2 pN. 6 mM Mg2+. Observed disassembly and detachment		6	1
2019-10-16	19_1016_115625	1.7198	0.1221	13.226	6.9109	0.075	-174.31	0.0347	Bead #5: Pre-loaded with 2 pN. 6 mM Mg2+. Observed disassembly and detachment		6	0
2019-10-16	19_1016_120929	1.7394	0.016858	17.035	3.1267	0.08	-167.4	0.0347	Bead #6: Pre-loaded with 2 pN. 6 mM Mg2+. Observed disassembly and detachment		6	1
2019-10-16	19_1016_121207	1.7468	0.035571	18.08	6.2762	0.2	-174.79	0.0347	Bead #7: Pre-loaded with 2 pN. 6 mM Mg2+. Observed disassembly and detachment		6	0
2019-10-23	19_1023_010911	1.8794	0.014125	23.654	2.3028	0.18	173.58	0.0347	Bead #6: Pre-loaded with 2 pN. 1 mM Mg2+. Observed disassembly and detachment.		1	1
2019-10-23	19_1023_012752	1.7714	0.014861	18.778	3.1063	0.175	-171.57	0.0347	Bead #7: Pre-loaded with 2 pN. 6 mM Mg2+ (actually 6). Observed disassembly and detachment.		1	1
2019-10-23	19_1023_113232	1.8124	0.020965	11.512	2.8609	0.12	177.87	0.0347	Bead #1: Pre-loaded with 2 pN. 1 mM Mg2+. Observed disassembly and detachment		1	1
2019-10-23	19_1023_115646	1.7782	0.013406	9.0963	2.7787	0.215	-168.8	0.0347	Bead #3: Pre-loaded with 2 pN. 1 mM Mg2+. Observed disassembly and detachment.		1	0
2019-10-23	19_1023_123509	1.789	0.038182	12.468	7.8132	0.085	-173.17	0.0347	Bead #5: Pre-loaded with 2 pN. 1 mM Mg2+. Observed disassembly and detachment.		1	0
2019-10-24	19_1024_104206	1.7835	0.023375	3.2009	6.0556	0.2	-170.72	0.0347	Bead #1: Pre-loaded with 2 pN. 12 mM Mg2+. Observed disassembly and detachment. Laser on when bead detached.		12	0
2019-10-24	19_1024_104426	1.728	0.0195	16.115	6.8411	0.045	-169.29	0.0347	Bead #2: Pre-loaded with 2 pN. 12 mM Mg2+. Observed disassembly and detachment		12	0
2019-10-24	19_1024_104759	1.8595	0.037166	23.033	2.666	0.07	176.37	0.0347	Bead #3: Pre-loaded with 2 pN. 12 mM Mg2+. Observed disassembly and detachment		12	1
2019-10-24	19_1024_105200	1.911	0.045349	18.606	5.2808	0.14	171.55	0.0347	Bead #4: Pre-loaded with 2 pN. 12 mM Mg2+. Observed disassembly and detachment		12	0
2019-10-24	19_1024_105411	1.9097	0.018556	33.225	3.1333	0.26	-159.35	0.0347	Bead #5: Pre-loaded with 2 pN. 12 mM Mg2+. Observed disassembly and detachment		12	1
2019-10-24	19_1024_105527	1.8398	0.02697	1.9319	3.1647	0.05	179.06	0.0347	Bead #6: Pre-loaded with 2 pN. 12 mM Mg2+. Observed disassembly and detachment		12	0
2019-10-24	19_1024_110330	1.8819	0.018287	25.98	2.703	0.145	179.92	0.0347	Bead #7: Pre-loaded with 2 pN. 12 mM Mg2+. Observed disassembly and detachment		12	1
2019-10-24	19_1024_110605	1.9583	0.022836	18.39	4.1793	0.195	-174.83	0.0347	Bead #8: Pre-loaded with 2 pN. 12 mM Mg2+. Observed disassembly and detachment		12	1
2019-10-24	19_1024_110641	1.907	0.018681	12.122	2.0142	0.095	-178.29	0.0347	Bead #9: Pre-loaded with 2 pN. 12 mM Mg2+. Observed disassembly and detachment		12	1
2019-10-24	19_1024_112933	1.8672	0.19295	26.839	5.8593	0.055	-179.36	0.0347	Bead #10: Pre-loaded with 2 pN. 12 mM Mg2+. Observed disassembly and detachment		12	1
2019-10-24	19_1024_113227	1.7671	0.010056	16.406	2.6401	0.24	-175.92	0.0347	Bead #11: Pre-loaded with 2 pN. 6 mM Mg2+. Observed disassembly and detachment		6	1
2019-10-24	19_1024_114603	1.784	0.023669	33.539	4.676	0.34	-171.67	0.0347	Bead #13: Pre-loaded with 2 pN. 6 mM Mg2+. Observed disassembly and detachment		6	1
2019-10-24	19_1024_114715	1.8315	0.060763	31.335	5.1183	0.08	174.37	0.0347	Bead #14: Pre-loaded with 2 pN. 6 mM Mg2+. Observed disassembly and detachment		6	1
2019-10-24	19_1024_114927	1.7789	0.019661	11.227	3.9241	0.125	-177.61	0.0347	Bead #15: Pre-loaded with 2 pN. 6 mM Mg2+. Observed disassembly and detachment. potential orthogonal pre-load		6	0
2019-10-24	19_1024_115143	1.956	0.022947	26.651	2.9678	0.215	174.93	0.0347	Bead #16: Pre-loaded with 2 pN. 6 mM Mg2+. Observed disassembly and detachment.		6	1
2019-10-24	19_1024_115453	1.7726	0.039085	16.487	10.611	0.06	176.89	0.0347	Bead #17: Pre-loaded with 2 pN. 6 mM Mg2+. Observed disassembly and detachment.		6	0
2019-10-24	19_1024_121247	1.8246	0.016065	36.724	2.7025	0.22	175.58	0.0347	Bead #18: Pre-loaded with 2 pN. 6 mM Mg2+. Observed disassembly and detachment.		6	0
2019-10-24	19_1024_122313	1.8374	0.062469	11.135	2.8791	0.05	172.53	0.0347	Bead #19: Pre-loaded with 2 pN. 6 mM Mg2+. Observed disassembly and detachment.		6	1
2019-10-24	19_1024_123542	1.8104	0.011004	16.849	2.0796	0.28	-177	0.0347	Bead #20: Pre-loaded with 2 pN. 6 mM Mg2+. Observed disassembly and detachment.		6	0
2019-10-29	19_1029_034412	1.8316	0.01891	25.588	3.5614	0.225	179.05	0.0347	Bead #1: Pre-loaded with 2 pN. 12 mM Mg2+. Observed disassembly and detachment		12	1
2019-10-29	19_1029_034645	1.8897	0.044096	36.894	7.3793	0.145	177.29	0.0347	Bead #2: Pre-loaded with 2 pN. 12 mM Mg2+. Observed disassembly and detachment		12	1
2019-10-29	19_1029_034835	1.7445	0.025547	32.015	3.1268	0.135	-171.12	0.0347	Bead #3: Pre-loaded with 2 pN. 12 mM Mg2+. Observed disassembly and detachment		12	1
2019-10-29	19_1029_040416	2.1559	0.05531	30.119	3.1791	0.095	2.3863	0.0347	Bead #6: Pre-loaded with 2 pN. 12 mM Mg2+. Observed disassembly and detachment		12	1
2019-10-29	19_1029_041249	1.941	0.0357	18.018	2.7317	0.14	-166.79	0.0347	Bead #8: Pre-loaded with 2 pN. 12 mM Mg2+. Observed disassembly and detachment		12	1
2019-10-29	19_1029_041517	1.4424	0.099562	18.613	5.5426	0.045	-173.26	0.0347	Bead #9: Pre-loaded with 2 pN. 12 mM Mg2+. Observed disassembly and detachment		12	0
2019-10-29	19_1029_041807	1.7787	0.031069	28.607	6.8448	0.16	-179.07	0.0347	Bead #10: Pre-loaded with 2 pN. 12 mM Mg2+. Observed disassembly and detachment		12	1
2019-10-29	19_1029_042202	1.7982	0.055561	18.892	3.0501	0.13	-178.24	0.0347	Bead #11: Pre-loaded with 2 pN. 6 mM Mg2+. Observed disassembly and detachment		6	1
2019-10-29	19_1029_042651	1.823	0.090113	19.373	5.8687	0.04	178.96	0.0347	Bead #11: Pre-loaded with 2 pN. 6 mM Mg2+. Observed disassembly and detachment		6	1
2019-10-29	19_1029_043240	2.2079	0.0093661	15.308	1.8974	0.205	2.1126	0.0347	Bead #12: Pre-loaded with 2 pN. 6 mM Mg2+. Observed disassembly and detachment		6	1
2019-10-29	19_1029_043541	1.9054	0.016658	20.102	2.7673	0.24	168.63	0.0347	Bead #13: Pre-loaded with 2 pN. 6 mM Mg2+. Observed disassembly and detachment.		6	1
2019-10-29	19_1029_043801	1.7648	0.10133	33.292	4.9291	0.045	-179.4	0.0347	Bead #15: Pre-loaded with 2 pN. 6 mM Mg2+. Observed disassembly and detachment.		6	1
2019-10-29	19_1029_043946	1.842	0.013546	10.661	2.5149	0.405	-178.61	0.0347	Bead #16: Pre-loaded with 2 pN. 6 mM Mg2+. Observed disassembly and detachment.		6	1
2019-10-29	19_1029_044222	1.7718	0.02202	23.159	3.2583	0.225	-176.88	0.0347	Bead #17: Pre-loaded with 2 pN. 6 mM Mg2+. Observed disassembly and detachment.		6	1
2019-10-29	19_1029_044724	1.8257	0.01356	22.058	3.1465	0.23	-174.46	0.0347	Bead #18: Pre-loaded with 2 pN. 6 mM Mg2+. Observed disassembly and detachment.		6	1
2019-10-29	19_1029_045007	1.7737	0.062777	14.183	2.0225	0.145	-177.38	0.0347	Bead #19: Pre-loaded with 2 pN. 6 mM Mg2+. Observed disassembly and detachment.		6	0
2019-10-29	19_1029_045106	1.8791	0.029097	36.012	5.0651	0.185	174.62	0.0347	Bead #20: Pre-loaded with 2 pN. 6 mM Mg2+. Observed disassembly and detachment.		6	1
2019-10-29	19_1029_045356	1.9045	0.031266	38.117	4.8768	0.09	-171.09	0.0347	Bead #21: Pre-loaded with 2 pN. 12 mM Mg2+. Observed disassembly and detachment.		12	1
2019-10-29	19_1029_045802	1.7942	0.024106	21.369	2.6477	0.16	-178.29	0.0347	Bead #22: Pre-loaded with 2 pN. 12 mM Mg2+. Observed disassembly and detachment.		12	1
2019-10-29	19_1029_050359	1.7981	0.064341	23.726	4.279	0.025	174.96	0.0347	Bead #23: Pre-loaded with 2 pN. 12 mM Mg2+. Observed disassembly and detachment.		12	1
2019-10-29	19_1029_050516	1.7955	0.052075	30.483	5.2416	0.125	-176.82	0.0347	Bead #24: Pre-loaded with 2 pN. 12 mM Mg2+. Observed disassembly and detachment.		12	1
2019-11-05	19_1105_055630	1.4799	0.21525	14.897	4.506	0.045	-172.18	0.0347	Bead #1: Pre-loaded with 2 pN. 20 mM Mg2+. Observed disassembly and detachment		20	0
2019-11-05	19_1105_062637	1.852	0.066613	38.522	3.3886	0.125	-173.27	0.0347	Bead #2: Pre-loaded with 2 pN. 20 mM Mg2+. Observed disassembly and detachment		20	1
2019-11-05	19_1105_063049	1.7334	0.12656	29.871	4.567	0.06	-166.91	0.0347	Bead #3: Pre-loaded with 2 pN. 20 mM Mg2+. Observed disassembly and detachment		20	1
2019-11-05	19_1105_063238	1.6907	0.067485	15.36	8.2617	0.105	179.91	0.0347	Bead #4: Pre-loaded with 2 pN. 20 mM Mg2+. Observed disassembly and detachment		20	0
2019-11-05	19_1105_063423	1.7936	0.1816	20.643	2.5886	0.055	171.67	0.0347	Bead #5: Pre-loaded with 2 pN. 20 mM Mg2+. Observed disassembly and detachment		20	1
2019-11-05	19_1105_065734	2.0175	0.016118	24.358	1.8577	0.185	175.54	0.0347	Bead #6: Pre-loaded with 2 pN. 20 mM Mg2+. Observed disassembly and detachment		20	1
2019-11-05	19_1105_070117	1.914	0.017845	23.394	4.2707	0.14	-167.54	0.0347	Bead #7: Pre-loaded with 2 pN. 20 mM Mg2+. Observed disassembly and detachment		20	1
2019-11-05	19_1105_071250	1.7921	0.16154	27.066	6.9148	0.06	-174.73	0.0347	Bead #8: Pre-loaded with 2 pN. 20 mM Mg2+. Observed disassembly and detachment		20	1
2019-11-05	19_1105_072325	2.0081	0.030784	29.853	6.0161	0.2	-172.78	0.0347	Bead #10: Pre-loaded with 2 pN. 20 mM Mg2+. Observed disassembly and detachment		20	1
2019-11-05	19_1105_073447	1.9957	0.034934	26.788	7.977	0.145	-171.62	0.0347	Bead #12: Pre-loaded with 2 pN. 1 mM Mg2+. Observed disassembly and detachment		20	1
2019-11-05	19_1105_074144	1.6597	0.0073534	30.672	3.5391	0.27	178.28	0.0347	Bead #14: Pre-loaded with 2 pN. 1 mM Mg2+. Observed disassembly and detachment		1	1
2019-11-05	19_1105_074436	1.8027	0.095558	16.651	2.9394	0.03	-179.08	0.0347	Bead #15: Pre-loaded with 2 pN. 1 mM Mg2+. Observed disassembly and detachment		1	1
2019-11-05	19_1105_075339	1.71	0.030936	22.591	5.2388	0.145	-166.78	0.0347	Bead #17: Pre-loaded with 2 pN. 1 mM Mg2+. Observed disassembly and detachment		1	1
2019-11-05	19_1105_075608	1.8923	0.013288	19.312	2.9791	0.165	-160.71	0.0347	Bead #18: Pre-loaded with 2 pN. 1 mM Mg2+. Observed disassembly and detachment		1	1
2019-11-05	19_1105_080003	1.8442	0.018549	20.124	4.4783	0.115	-179.36	0.0347	Bead #19: Pre-loaded with 2 pN. 1 mM Mg2+. Observed disassembly and detachment		1	0
2019-11-05	19_1105_080634	1.7383	0.054877	34.028	5.5583	0.15	-172.63	0.0347	Bead #20: Pre-loaded with 2 pN. 20 mM Mg2+. Observed disassembly and detachment		20	1
2019-11-06	19_1106_053254	1.6938	0.068643	35.06	8.2477	0.11	-153.5	0.0347	Bead #1: Pre-loaded with 2 pN. 20 mM Mg2+. Observed disassembly and detachment		20	1
2019-11-06	19_1106_054646	1.8635	0.062906	19.086	2.8781	0.115	-174.82	0.0347	Bead #3: Pre-loaded with 2 pN. 20 mM Mg2+. Observed disassembly and detachment		20	1
2019-11-06	19_1106_054931	1.9022	0.017155	22.467	3.937	0.185	-171.73	0.0347	Bead #4: Pre-loaded with 2 pN. 20 mM Mg2+. Observed disassembly and detachment		20	1
2019-11-06	19_1106_060026	1.8979	0.069033	29.284	7.0015	0.075	170.83	0.0347	Bead #5: Pre-loaded with 2 pN. 20 mM Mg2+. Observed disassembly and detachment		20	1
2019-11-06	19_1106_060241	1.8256	0.15996	18.689	3.4952	0.085	-168.36	0.0347	Bead #6: Pre-loaded with 2 pN. 20 mM Mg2+. Observed disassembly and detachment		20	1
2019-11-06	19_1106_060833	1.8402	0.016994	33.751	5.4224	0.12	-178.4	0.0347	Bead #7: Pre-loaded with 2 pN. 20 mM Mg2+. Observed disassembly and detachment		20	1
2019-11-06	19_1106_061233	1.8963	0.10366	31.601	3.0633	0.135	178.92	0.0347	Bead #9: Pre-loaded with 2 pN. 20 mM Mg2+. Observed disassembly and detachment		20	1
2019-11-06	19_1106_061609	1.9012	0.019793	29.704	2.4713	0.195	176.02	0.0347	Bead #10: Pre-loaded with 2 pN. 20 mM Mg2+. Observed disassembly and detachment		20	1
2019-11-06	19_1106_062350	1.9375	0.060034	13.227	2.7608	0.045	-171.63	0.0347	Bead #12: Pre-loaded with 2 pN. 1 mM Mg2+. Observed disassembly and detachment		1	1
2019-11-06	19_1106_063734	1.8689	0.0086163	18.738	2.6244	0.535	-175.88	0.0347	Bead #15: Pre-loaded with 2 pN. 1 mM Mg2+. Observed disassembly and detachment.		1	1
2019-11-06	19_1106_064105	1.8896	0.026842	27.51	8.8341	0.34	173.75	0.0347	Bead #16: Pre-loaded with 2 pN. 1 mM Mg2+. Observed disassembly and detachment.		1	0
2019-11-06	19_1106_064356	1.8418	0.045958	17.496	3.3564	0.085	173.95	0.0347	Bead #18: Pre-loaded with 2 pN. 1 mM Mg2+. Observed disassembly and detachment.		1	1
2019-11-06	19_1106_064833	1.922	0.032538	38.407	6.4493	0.26	-174.75	0.0347	Bead #20: Pre-loaded with 2 pN. 1 mM Mg2+. Observed disassembly and detachment.		1	1
2019-11-06	19_1106_065213	2.0889	0.068859	38.385	2.2053	0.13	-5.8109	0.0347	Bead #21: Pre-loaded with 2 pN. 20 mM Mg2+. Observed disassembly and detachment.		20	1
2019-11-06	19_1106_065807	1.8615	0.033438	35.716	6.1101	0.19	-170.51	0.0347	Bead #23: Pre-loaded with 2 pN. 20 mM Mg2+. Observed disassembly and detachment.		20	1
2019-11-06	19_1106_070730	1.8561	0.046066	17.878	4.2641	0.12	-173.8	0.0347	Bead #24: Pre-loaded with 2 pN. 20 mM Mg2+. Observed disassembly and detachment.		20	1
2019-11-06	19_1106_071437	1.8503	0.15161	15.858	2.7286	0.075	-166.35	0.0347	Bead #27: Pre-loaded with 2 pN. 20 mM Mg2+. Observed disassembly and detachment.		20	0
2019-11-06	19_1106_072136	1.91	0.040385	25.339	2.269	0.185	-169.76	0.0347	Bead #28: Pre-loaded with 2 pN. 20 mM Mg2+. Observed disassembly and detachment.		20	1
2019-11-06	19_1106_072530	1.8132	0.051581	26.955	4.2676	0.085	171.64	0.0347	Bead #29: Pre-loaded with 2 pN. 20 mM Mg2+. Observed disassembly and detachment.		20	1
2019-11-06	19_1106_073513	1.9371	0.014645	16.505	2.1552	0.105	179.63	0.0347	Bead #31: Pre-loaded with 2 pN. 20 mM Mg2+. Observed disassembly and detachment.		20	1
2019-11-06	19_1106_074300	1.8825	0.019802	44.567	5.3709	0.175	-178.93	0.0347	Bead #32: Pre-loaded with 2 pN. 20 mM Mg2+. Observed disassembly and detachment.		20	1
2019-11-06	19_1106_080006	1.891	0.014638	20.778	3.768	0.14	178.79	0.0347	Bead #35: Pre-loaded with 2 pN. 20 mM Mg2+. Observed disassembly and detachment.		20	1
2019-11-06	19_1106_080921	1.9356	0.076779	13.035	3.4416	0.09	175.41	0.0347	Bead #38: Pre-loaded with 2 pN. 20 mM Mg2+. Observed disassembly and detachment.		20	0
2019-11-06	19_1106_081331	2.1383	0.026484	19.847	2.7829	0.135	1.546	0.0347	Bead #40: Pre-loaded with 2 pN. 20 mM Mg2+. Observed disassembly and detachment.		20	1
2019-11-07	19_1107_053336	1.8053	0.051156	17.756	1.8802	0.07	178.69	0.0347	Bead #2: Pre-loaded with 2 pN. 16 mM Mg2+. Observed disassembly and detachment		16	1
2019-11-07	19_1107_054315	1.7922	0.076267	15.071	3.0612	0.095	-178.95	0.0347	Bead #5: Pre-loaded with 2 pN. 16 mM Mg2+. Observed disassembly and detachment		16	1
2019-11-07	19_1107_055034	1.8217	0.014885	16.079	2.4386	0.215	-179.66	0.0347	Bead #6: Pre-loaded with 2 pN. 16 mM Mg2+. Observed disassembly and detachment. Laser possibly on when bead detached.		16	1
2019-11-07	19_1107_055333	1.7983	0.027737	24.353	5.7465	0.17	177.98	0.0347	Bead #7: Pre-loaded with 2 pN. 16 mM Mg2+. Observed disassembly and detachment. Laser possibly on when bead detached.		16	0
2019-11-07	19_1107_055605	1.8277	0.10658	36.646	2.9423	0.075	-179.46	0.0347	Bead #8: Pre-loaded with 2 pN. 16 mM Mg2+. Observed disassembly and detachment.		16	1
2019-11-07	19_1107_055744	1.7237	0.019494	32.551	2.6975	0.23	176.3	0.0347	Bead #9: Pre-loaded with 2 pN. 16 mM Mg2+. Observed disassembly and detachment.		16	1
2019-11-07	19_1107_055935	1.7805	0.029057	28.893	5.7466	0.16	175.04	0.0347	Bead #10: Pre-loaded with 2 pN. 16 mM Mg2+. Observed disassembly and detachment.		16	0
2019-11-07	19_1107_060917	1.9194	0.045073	23.234	3.4065	0.14	-179.07	0.0347	Bead #11: Pre-loaded with 2 pN. 12 mM Mg2+. Observed disassembly and detachment.		12	1
2019-11-07	19_1107_061407	1.8319	0.013782	17.828	2.0917	0.145	-175.72	0.0347	Bead #12: Pre-loaded with 2 pN. 12 mM Mg2+. Observed disassembly and detachment.		12	1
2019-11-07	19_1107_064141	1.9285	0.011923	17.167	2.474	0.05	-177.36	0.0347	Bead #15: Pre-loaded with 2 pN. 12 mM Mg2+. Observed disassembly and detachment. laser on when bead detached		12	1
2019-11-07	19_1107_065203	1.8837	0.052636	20.422	2.6858	0.14	-173.25	0.0347	Bead #16: Pre-loaded with 2 pN. 12 mM Mg2+. Observed disassembly and detachment. laser on when bead detached		12	1
2019-11-07	19_1107_065458	1.7552	0.0082305	21.048	2.7822	0.44	173.83	0.0347	Bead #17: Pre-loaded with 2 pN. 12 mM Mg2+. Observed disassembly and detachment. laser on when bead detached		12	1
2019-11-07	19_1107_072236	1.9554	0.043886	20.063	3.1349	0.12	178.75	0.0347	Bead #18: Pre-loaded with 2 pN. 16 mM Mg2+. Observed disassembly and detachment. laser on when bead detached		16	1
2019-11-07	19_1107_072922	1.8834	0.037592	20.375	6.2768	0.075	-177.78	0.0347	Bead #20: Pre-loaded with 2 pN. 16 mM Mg2+. Observed disassembly and detachment. laser on when bead detached		16	0
2019-11-07	19_1107_073048	1.8604	0.01641	35.846	2.7404	0.195	-174.16	0.0347	Bead #21: Pre-loaded with 2 pN. 16 mM Mg2+. Observed disassembly and detachment. laser on when bead detached		16	1
2019-11-07	19_1107_073230	1.7901	0.15137	8.0202	11.635	0.01	178.08	0.0347	Bead #22: Pre-loaded with 2 pN. 16 mM Mg2+. Observed disassembly and detachment. laser on when bead detached		16	0
2019-11-07	19_1107_073354	1.9263	0.046481	15.237	1.8173	0.155	174.68	0.0347	Bead #23: Pre-loaded with 2 pN. 16 mM Mg2+. Observed disassembly and detachment. laser on when bead detached		16	1
2019-11-07	19_1107_073817	1.8214	0.13304	27.224	2.8303	0.13	175.1	0.0347	Bead #24: Pre-loaded with 2 pN. 16 mM Mg2+. Observed disassembly and detachment. laser on when bead detached. laser po	Laser not on when bead detached (verified by assessment of y-signal trace)	16	1
2019-11-07	19_1107_073929	1.8743	0.038025	29.261	2.8579	0.165	177.38	0.0347	Bead #25: Pre-loaded with 2 pN. 16 mM Mg2+. Observed disassembly and detachment.		16	1
2019-11-07	19_1107_074214	1.7433	0.16608	34.972	3.0302	0.11	-177.74	0.0347	Bead #26: Pre-loaded with 2 pN. 16 mM Mg2+. Observed disassembly and detachment.		16	1
2019-11-07	19_1107_075029	1.532	0.06613	28.342	7.8114	0.055	-178.99	0.0347	Bead #27: Pre-loaded with 2 pN. 16 mM Mg2+. Observed disassembly and detachment.		16	1
2019-11-07	19_1107_075615	1.7827	0.16068	8.4621	3.6858	0.09	-177.68	0.0347	Bead #28: Pre-loaded with 2 pN. 16 mM Mg2+. Observed disassembly and detachment.		16	0
2019-11-13	19_1113_102021	1.7972	0.024705	54.916	4.5968	0.235	174.31	0.0347	Bead #1: Pre-loaded with 2 pN. 20 mM Mg2+. Observed disassembly and detachment		20	1
2019-11-13	19_1113_102517	1.7719	0.016799	20.259	3.5085	0.09	-175.01	0.0347	Bead #2: Pre-loaded with 2 pN. 20 mM Mg2+. Observed disassembly and detachment		20	1
2019-11-13	19_1113_104626	1.8263	0.13004	31.115	4.6267	0.07	177.29	0.0347	Bead #3: Pre-loaded with 2 pN. 20 mM Mg2+. Observed disassembly and detachment		20	1
2019-11-13	19_1113_105431	1.7013	0.16521	41.25	2.5424	0.055	178.56	0.0347	Bead #5: Pre-loaded with 2 pN. 20 mM Mg2+. Observed disassembly and detachment		20	1
2019-11-13	19_1113_105556	1.7299	0.028895	33.951	6.0216	0.245	172.92	0.0347	Bead #5: Pre-loaded with 2 pN. 20 mM Mg2+. Observed disassembly and detachment. large orthogonal pre-load		20	1
2019-11-13	19_1113_110604	1.8375	0.039996	25.61	5.5064	0.055	-177.27	0.0347	Bead #6: Pre-loaded with 2 pN. 20 mM Mg2+. Observed disassembly and detachment.		20	1
2019-11-13	19_1113_110901	1.7563	0.084265	14.251	2.9311	0.045	-178.13	0.0347	Bead #7: Pre-loaded with 2 pN. 20 mM Mg2+. Observed disassembly and detachment.		20	1
2019-11-13	19_1113_111407	1.8961	0.083902	16.612	4.6516	0.035	178.45	0.0347	Bead #8: Pre-loaded with 2 pN. 16 mM Mg2+. Observed disassembly and detachment.		16	1
2019-11-13	19_1113_112054	1.8023	0.013131	39.655	1.8556	0.165	178.89	0.0347	Bead #10: Pre-loaded with 2 pN. 16 mM Mg2+. Observed disassembly and detachment.		16	1
2019-11-13	19_1113_112428	1.9488	0.07485	28.294	4.271	0.115	-169.86	0.0347	Bead #11: Pre-loaded with 2 pN. 16 mM Mg2+. Observed disassembly and detachment.		16	1
2019-11-13	19_1113_112715	1.714	0.15378	12.431	NaN	0.035	-178.69	0.0347	Bead #12: Pre-loaded with 2 pN. 16 mM Mg2+. Observed disassembly and detachment.		16	0
2019-11-13	19_1113_114029	1.8635	0.023972	16.27	2.8884	0.085	176.79	0.0347	Bead #15: Pre-loaded with 2 pN. 16 mM Mg2+. Observed disassembly and detachment. some orthogonal pre-load		16	1
2019-11-13	19_1113_115131	1.8669	0.023801	63.976	9.2354	0.365	178.49	0.0347	Bead #17: Pre-loaded with 2 pN. 16 mM Mg2+. Observed disassembly and detachment.		16	1
2019-11-13	19_1113_115425	1.8049	0.103	38.673	4.3517	0.115	179.92	0.0347	Bead #18: Pre-loaded with 2 pN. 16 mM Mg2+. Observed disassembly and detachment.		16	1
2019-11-13	19_1113_120430	1.847	0.010266	22.16	4.5006	0.17	-178.04	0.0347	Bead #19: Pre-loaded with 2 pN. 16 mM Mg2+. Observed disassembly and detachment.		16	1
2019-11-13	19_1113_120524	1.7555	0.018768	25.317	3.9543	0.19	177	0.0347	Bead #20: Pre-loaded with 2 pN. 16 mM Mg2+. Observed disassembly and detachment.		16	1
2019-12-17	19_1217_093158	1.4465	0.0096192	6.4784	2.7253	0.04	175.16	0.0347	bead 1 detached after disassembly maybe a wave		1	0
2019-12-17	19_1217_094212	1.8729	0.010608	7.8703	2.525	0.49	176.5	0.0347	bead 2 reset the origin (which Haein did not do) detached after disassembly maybe a wave	No Wave	1	0
2019-12-17	19_1217_094859	1.8378	0.011404	7.5001	3.5671	0.2	177.11	0.0347	bead 3 reset origin detachment after disassembly	No Wave	1	0
2019-12-17	19_1217_095635	1.8956	0.021178	10.816	3.4821	0.02	-173.58	0.0347	bead 4 reset origin MT was already depolymerizing when I was positioning the MT so I just let it disassemble past the bead detached after disassembly	No Wave	1	0
2019-12-17	19_1217_095910	1.8292	0.022123	16.241	4.1751	0.38	-174.83	0.0347	bead 5 reset origin MT was pretty short, maybe two? detached after disassembly	wave	1	1
2019-12-17	19_1217_100511	1.8339	0.035871	14.246	3.6057	0.08	-175.17	0.0347	bead 6 reset origin the extension was not as long, so had to try a couple of times detached after disassembly		1	1
2019-12-17	19_1217_103343	1.8738	0.012493	5.4939	4.1924	0.205	-176.5	0.0347	bead 7 reset origin the extension was not as long, so had to try a couple of times detached after disassembly		1	0
2019-12-17	19_1217_104602	1.8399	0.015497	12.763	1.828	0.125	169.48	0.0347	bead 8 reset origin bead detached after disassembly		1	1
2019-12-17	19_1217_105450	1.9588	0.010677	10.964	2.7866	0.205	-179.92	0.0347	bead 9 reset origin bead detached after disassembly		1	1
2019-12-17	19_1217_105847	1.7956	0.013491	7.0341	2.5499	0.24	174.23	0.0347	bead 10 reset origin bead detached after disassembly		1	0
2019-12-17	19_1217_110348	1.5286	0.012587	15.356	2.1599	0.16	174.94	0.0347	bead 11 reset origin bead detached after disassembly		1	1
2019-12-17	19_1217_110843	2.0117	0.0097198	14.034	2.3423	0.365	174	0.0347	bead 12 reset origin bead detached after disassembly		1	1
2019-12-18	19_1218_093313	1.7825	0.019537	31.232	4.0374	0.7	179.41	0.0347	Haein and Lucas Haein driving 20mM MgCl2 Bead 2 reset origin bead detached after disassembly	Large Wave	20	1
2019-12-18	19_1218_093755	1.7559	0.025933	31.847	4.6594	0.53	-179.29	0.0347	Haein and Lucas Haein driving 20mM MgCl2 Bead 3 reset origin bead detached after disassembly double wave?	Large Wave	20	1
2019-12-18	19_1218_101827	1.7743	0.12245	22.55	2.6042	0.03	177.32	0.0347	Haein and Lucas Haein driving 20mM MgCl2 Bead7 extension was very short, but disassembled when cut bead detached		20	1
2019-12-18	19_1218_103050	1.789	0.00902	10.636	2.9784	0.14	173.77	0.0347	Haein and Lucas Haein driving 1mM MgCl2 Bead1 extension was very short, but disassembled when cut bead detached		1	1
2019-12-18	19_1218_104116	1.8174	0.033819	27.211	3.1839	0.165	176.59	0.0347	Haein and Lucas Haein driving 1mM MgCl2 Bead3 bead detached after disassembly		1	1
2019-12-18	19_1218_104226	1.8434	0.01401	21.171	2.4745	0.04	179.09	0.0347	Haein and Lucas Haein driving 1mM MgCl2 Bead4 extension was not as long- multiple tries to cut bead detached after disassembly		1	1
2019-12-18	19_1218_104441	1.8219	0.012322	13.635	3.6668	0.17	-178.39	0.0347	Haein and Lucas Haein driving 1mM MgCl2 Bead5 extension was long bead detached after disassembly	No Wave	1	0
2019-12-18	19_1218_104544	1.7619	0.018146	7.0846	3.076	0.215	179.83	0.0347	Haein and Lucas Haein driving 1mM MgCl2 Bead5 reset origin extension was long bead detached after disassembly	Indeterminate	1	0
2019-12-18	19_1218_104725	1.7911	0.025734	10.431	NaN	0.095	174.2	0.0347	Haein and Lucas Haein driving 1mM MgCl2 Bead6 reset origin extension was long bead detached after disassembly	Wave	1	1
2019-12-18	19_1218_104959	1.8091	0.032179	12.881	5.9853	0.6	-174.32	0.0347	Haein and Lucas Haein driving 1mM MgCl2 Bead7 reset origin extension was long- maybe from another bead? could be noisy bead detached after disassembly	Large noise baseline, indeterminate	1	0
2019-12-18	19_1218_105234	1.8429	0.01949	18.344	3.2567	0.18	-174.8	0.0347	Haein and Lucas Haein driving 1mM MgCl2 Bead8 reset origin bead detached after disassembly	good wave	1	1
2019-12-18	19_1218_110036	1.8156	0.016673	17.002	2.5838	0.165	173.54	0.0347	Haein and Lucas Haein driving 1mM MgCl2 Bead9 reset origin there was a MT seed right near where the bead was tethered bead detached after disassembly		1	1
2019-12-18	19_1218_110226	1.837	0.0073066	16.242	3.0119	0.545	174.14	0.0347	Haein and Lucas Haein driving 1mM MgCl2 Bead10 reset origin short extension beyond the bead bead detached after disassembly		1	1
2019-12-18	19_1218_110822	1.6957	0.0090123	31.314	2.0935	0.265	172.31	0.0347	Haein and Lucas Haein driving 20mM MgCl2 Bead8 reset origin bead detached after disassembly		20	1
2019-12-18	19_1218_111533	1.8641	0.012348	27.84	3.1759	0.51	-179.71	0.0347	Haein and Lucas Haein driving 20mM MgCl2 Bead9 reset origin the MT attached bead was over another bead bead detached after disassembly		20	1
2019-12-18	19_1218_111728	1.8216	0.057637	28.61	5.3474	0.085	-172.31	0.0347	Haein and Lucas Haein driving 20mM MgCl2 Bead10 reset origin bead detached after disassembly		20	1
2019-12-18	19_1218_113246	1.4259	0.035774	19.713	2.8081	0.12	-179.52	0.0347	Haein and Lucas Haein driving 20mM MgCl2 Bead11 multiple tries to cut- extension was short bead detached after disassembly		20	1
2019-12-18	19_1218_113710	1.8052	0.050653	47.393	5.6454	0.115	169.64	0.0347	Haein and Lucas Haein driving 20mM MgCl2 Bead12 reset origin bead detached after disassembly saw a wave		20	1
2020-07-29	20_0729_090333	1.8713	0.0096498	12.968	2.0411	0.28	-178.76	0.0347	Bead #1: Pre-loaded with 2 pN. 1 mM Mg2+, Observed dissassembly, detachment. Cut proximal to bead.		1	1	1
2020-07-29	20_0729_093140	3.8757	0.053299	48.819	9.7636	0.2	-179.9	0.0347	Bead #2: Pre-loaded with 4 pN. 6 mM Mg2+, Observed dissassembly, detachment. Cut proximal to bead.		6	0	1
2020-07-30	20_0730_035341	4.0516	0.017904	16.95	3.3496	0.33	-4.1878	0.0347	Bead #1: Pre-loaded with 4 pN. 1 mM Mg2+, Observed dissassembly, odd detachment. Cut proximal to bead.		1	1	1
2020-07-30	20_0730_040534	3.8548	0.01401	5.0303	2.9756	0	179.35	0.0347	Bead #5: Pre-loaded with 4 pN. 1 mM Mg2+, Observed dissassembly, odd detachment. Cut proximal to bead.		1	0	1
2020-07-30	20_0730_040838	3.8133	0.019136	21.136	3.0608	0.255	180	0.0347	Bead #6: Pre-loaded with 4 pN. 1 mM Mg2+, Observed dissassembly, odd detachment, long time from depoly to bead until detachment. Cut proximal to bead.		1	1	1
2020-07-30	20_0730_041137	3.8971	0.01499	4.0102	6.7575	0.2	-177.24	0.0347	Bead #7: Pre-loaded with 4 pN. 1 mM Mg2+, Observed dissassembly, odd detachment, long time from depoly to bead until detachment. Cut proximal to bead.		1	0	1
2020-07-30	20_0730_041654	3.8131	0.011358	2.7032	3.932	0.23	-177.49	0.0347	Bead #8: Pre-loaded with 4 pN. 1 mM Mg2+, Observed dissassembly, detachment. Cut proximal to bead. Laser likely on when bead detached		1	0	1
2020-07-30	20_0730_043110	3.8472	0.011293	4.6058	2.1732	0.48	178.61	0.0347	Bead #8: Pre-loaded with 4 pN. 1 mM Mg2+, Observed dissassembly, detachment. Cut proximal to bead.		1	0	1
2020-07-30	20_0730_043255	2.2196	0.010973	21.838	2.7584	0.23	0.71366	0.0347	Bead #9: Pre-loaded with 2 pN. 1 mM Mg2+, Observed dissassembly, detachment. Cut proximal to bead.		1	1	1
2020-07-30	20_0730_040126	NaN	NaN	NaN	NaN	NaN	NaN	0.0347	Bead #10: Pre-loaded with 2 pN. 1 mM Mg2+, Observed dissassembly, no detachment. Cut proximal to bead.		1	0	0
2020-07-30	20_0730_043754	NaN	NaN	NaN	NaN	NaN	NaN	0.0347	Bead #11: Pre-loaded with 2 pN. 1 mM Mg2+, Observed dissassembly, no detachment. Cut proximal to bead.		1	0	0
2020-07-30	20_0730_045052	3.8955	0.013107	17.03	2.8179	0.795	177.14	0.0347	Bead #12: Pre-loaded with 4 pN. 6 mM Mg2+, Observed dissassembly, no detachment. Cut proximal to bead.		6	1	1
2020-07-30	20_0730_045531	3.7386	0.013191	-0.069827	3.8027	0.08	178.8	0.0347	Bead #13: Pre-loaded with 4 pN. 6 mM Mg2+, Observed dissassembly, detachment. Cut proximal to bead. very short MT		6	0	1
2020-07-30	20_0730_050328	3.7369	0.012906	10.998	3.2214	0.18	173.81	0.0347	Bead #14: Pre-loaded with 4 pN. 6 mM Mg2+, Observed dissassembly, detachment. Cut proximal to bead. long detachment delay		6	1	1
2020-07-30	20_0730_050454	3.8422	0.013329	12.707	3.5873	0.3	179.12	0.0347	Bead #15: Pre-loaded with 4 pN. 6 mM Mg2+, Observed dissassembly, detachment. Cut proximal to bead.		6	1	1
2020-07-30	20_0730_050922	1.8638	0.020641	20.222	3.3994	1.3	-175.3	0.0347	Bead #16: Pre-loaded with 2 pN. 6 mM Mg2+, Observed dissassembly, detachment. Cut proximal to bead.		6	1	1
2020-07-30	20_0730_051115	1.8769	0.015349	29.623	3.6769	0.135	-176.74	0.0347	Bead #17: Pre-loaded with 2 pN. 6 mM Mg2+, Observed dissassembly, detachment. Cut proximal to bead.		6	1	1
2020-07-30	20_0730_051220	3.8546	0.014419	6.9954	2.7209	0.32	-179.94	0.0347	Bead #18: Pre-loaded with 2 pN. 6 mM Mg2+, Observed dissassembly, detachment. Cut proximal to bead. long delay to detachment		6	0	1
2020-07-30	20_0730_051653	3.8542	0.015659	6.3228	3.9886	0.1	177.64	0.0347	Bead #19: Pre-loaded with 2 pN. 6 mM Mg2+, Observed dissassembly, detachment. Cut proximal to bead.		6	0	1
2020-07-30	20_0730_052427	3.8346	0.012288	25.163	4.7325	0.24	179.89	0.0347	Bead #20: Pre-loaded with 4 pN. 6 mM Mg2+, Observed dissassembly, detachment. Cut proximal to bead.		6	1	1
2020-07-30	20_0730_052548	3.7596	0.027779	5.3912	4.2502	0.28	179.97	0.0347	Bead #21: Pre-loaded with 4 pN. 6 mM Mg2+, Observed dissassembly, detachment. Cut proximal to bead.		6	0	1
2020-07-30	20_0730_053808	3.902	0.012039	20.21	4.3011	0.085	-179.79	0.0347	Bead #22: Pre-loaded with 4 pN. 6 mM Mg2+, Observed dissassembly, detachment. Cut proximal to bead.		6	1	1
2020-07-30	20_0730_053929	3.8463	0.021261	16.764	4.1151	0.16	-177.75	0.0347	Bead #23: Pre-loaded with 4 pN. 6 mM Mg2+, Observed dissassembly, detachment. Cut proximal to bead.		6	1	1
2020-07-30	20_0730_054202	3.7628	0.014881	6.8478	2.7904	0.305	177.74	0.0347	Bead #24: Pre-loaded with 4 pN. 6 mM Mg2+, Observed dissassembly, detachment. Cut proximal to bead.		6	0	1
2020-07-30	20_0730_054619	NaN	NaN	NaN	NaN	NaN	NaN	0.0347	Bead #25: Pre-loaded with 4 pN. 6 mM Mg2+, Observed dissassembly, no detachment. Cut proximal to bead.		6	0	0
2020-07-30	20_0730_054742	3.8504	0.008916	4.9527	4.0752	0.52	-178.27	0.0347	Bead #26: Pre-loaded with 4 pN. 6 mM Mg2+, Observed dissassembly, no detachment. Cut proximal to bead.		6	0	1
2020-07-31	20_0731_112749	2.0703	0.015093	9.386	4.4349	0.12	1.7028	0.0347	Bead #1: Pre-loaded with 2 pN. 1 mM Mg2+, Observed dissassembly, detachment. Cut proximal to bead.		1	0	1
2020-07-31	20_0731_113102	3.8534	0.018177	17.532	3.6009	0.4	-178.94	0.0347	Bead #2: Pre-loaded with 4 pN. 1 mM Mg2+, Observed dissassembly, detachment. Cut proximal to bead.		1	0	1
2020-07-31	20_0731_113501	2.0783	0.014106	4.3687	2.2808	0.15	3.8396	0.0347	Bead #3: Pre-loaded with 2 pN. 1 mM Mg2+, Observed dissassembly, detachment. Cut proximal to bead.		1	0	1
2020-07-31	20_0731_113726	3.8534	0.01226	13.682	2.2611	0.165	179.89	0.0347	Bead #4: Pre-loaded with 4 pN. 1 mM Mg2+, Observed dissassembly, detachment. Cut proximal to bead.		1	1	1
2020-07-31	20_0731_114108	1.8426	0.020977	7.2047	4.0068	0.045	177.58	0.0347	Bead #5: Pre-loaded with 2 pN. 1 mM Mg2+, Observed dissassembly, detachment. Cut proximal to bead.		1	0	1
2020-07-31	20_0731_114320	3.8186	0.053857	2.6268	2.3084	0.1	178.15	0.0347	Bead #6: Pre-loaded with 4 pN. 6 mM Mg2+, Observed dissassembly, detachment. Cut proximal to bead.		6	0	1
2020-07-31	20_0731_114449	2.0492	0.023229	19.657	2.3562	0.135	-16.122	0.0347	Bead #7: Pre-loaded with 2 pN. 6 mM Mg2+, Observed dissassembly, detachment. Cut proximal to bead.		6	1	1
2020-07-31	20_0731_114652	3.8781	0.015198	4.5158	3.7024	0.055	179.4	0.0347	Bead #8: Pre-loaded with 4 pN. 6 mM Mg2+, Observed dissassembly, detachment. Cut proximal to bead.		6	0	1
2020-07-31	20_0731_114756	1.7647	0.027261	16.649	4.6611	0.205	-173.72	0.0347	Bead #9: Pre-loaded with 2 pN. 6 mM Mg2+, Observed dissassembly, detachment. Cut proximal to bead.		6	1	1
2020-07-31	20_0731_115249	1.929	0.033275	40.818	6.3941	0.14	-171.72	0.0347	Bead #10: Pre-loaded with 2 pN. 6 mM Mg2+, Observed dissassembly, detachment. Cut proximal to bead.		6	1	1
2020-07-31	20_0731_115747	1.92	0.015805	17.489	3.5533	0.08	176.81	0.0347	Bead #11: Pre-loaded with 2 pN. 6 mM Mg2+, Observed dissassembly, detachment. Cut proximal to bead.		6	1	1
2020-07-31	20_0731_120245	3.849	0.017049	10.871	2.7175	0.22	175.79	0.0347	Bead #12: Pre-loaded with 4 pN. 6 mM Mg2+, Observed dissassembly, detachment. Cut proximal to bead.		6	0	1
2020-07-31	20_0731_121428	4.1332	0.021379	7.7715	3.6709	0.24	3.8208	0.0347	Bead #13: Pre-loaded with 4 pN. 1 mM Mg2+, Observed dissassembly, detachment. Cut proximal to bead. delay between depoly and detachment		1	0	1
2020-07-31	20_0731_121917	1.8803	0.013773	35.178	3.1436	0.23	-179.64	0.0347	Bead #14: Pre-loaded with 2 pN. 1 mM Mg2+, Observed dissassembly, detachment. Cut proximal to bead.		1	1	1
2020-07-31	20_0731_122053	3.8107	0.018461	7.6345	7.5159	0.085	178.58	0.0347	Bead #15: Pre-loaded with 4 pN. 1 mM Mg2+, Observed dissassembly, detachment. Cut proximal to bead.		1	0	1
2020-07-31	20_0731_122237	3.8509	0.028913	13.109	6.4763	0.165	-179.52	0.0347	Bead #16: Pre-loaded with 4 pN. 1 mM Mg2+, Observed dissassembly, detachment. Cut proximal to bead.		1	0	1
2020-07-31	20_0731_122556	1.8229	0.024962	1.6235	3.6884	0.26	-176.93	0.0347	Bead #17: Pre-loaded with 2 pN. 1 mM Mg2+, Observed dissassembly, detachment. Cut proximal to bead.		1	0	1
2020-07-31	20_0731_122804	3.8471	0.02843	21.69	9.2912	0.285	-178.35	0.0347	Bead #18: Pre-loaded with 4 pN. 1 mM Mg2+, Observed dissassembly, detachment. Cut proximal to bead.		1	0	1
2020-07-31	20_0731_123049	3.8555	0.033109	5.1461	3.1148	0.06	-178.04	0.0347	Bead #20: Pre-loaded with 4 pN. 6 mM Mg2+, Observed dissassembly, detachment. Cut proximal to bead. laser maybe on during detachment		6	0	1
2020-07-31	20_0731_123534	4.0475	0.022936	9.7289	2.0657	0.545	3.5076	0.0347	Bead #21: Pre-loaded with 4 pN. 6 mM Mg2+, Observed dissassembly, detachment. Cut proximal to bead.		6	1	1
2020-07-31	20_0731_123958	3.9724	0.11895	19.331	2.769	0.08	4.1226	0.0347	Bead #22: Pre-loaded with 4 pN. 6 mM Mg2+, Observed dissassembly, detachment. Cut proximal to bead.		6	1	1
2020-07-31	20_0731_124152	1.8671	0.015473	7.7696	3.6437	0.3	-177.13	0.0347	Bead #23: Pre-loaded with 2 pN. 6 mM Mg2+, Observed dissassembly, detachment. Cut proximal to bead.		6	0	1
2020-07-31	20_0731_124316	3.7532	0.0103	5.5287	2.3508	0.315	-179.85	0.0347	Bead #24: Pre-loaded with 4 pN. 6 mM Mg2+, Observed dissassembly, detachment. Cut proximal to bead.		6	0	1
2020-07-31	20_0731_125414	1.8734	0.020377	23.733	4.4375	0.27	178.29	0.0347	Bead #25: Pre-loaded with 2 pN. 6 mM Mg2+, Observed dissassembly, detachment. Cut proximal to bead.		6	1	1
2020-08-03	20_0803_070350	5.5382	0.034994	10.376	3.0581	0.345	178.86	0.0683	Bead #1: Pre-loaded with 6 pN. 6 mM Mg2+, Observed dissassembly, detachment. Cut proximal to bead.		6	1	1
2020-08-03	20_0803_070839	5.7631	0.043009	1.7858	3.6744	0.2	179.78	0.0683	Bead #2: Pre-loaded with 6 pN. 6 mM Mg2+, Observed dissassembly, detachment. Cut proximal to bead.		6	0	1
2020-08-03	20_0803_070937	5.8064	0.02021	13.152	2.3608	0.15	176.09	0.0683	Bead #3: Pre-loaded with 6 pN. 6 mM Mg2+, Observed dissassembly, detachment. Cut proximal to bead.		6	1	1
2020-08-03	20_0803_071109	7.758	0.05332	15.628	8.4529	0.24	178.51	0.0683	Bead #4: Pre-loaded with 8 pN. 6 mM Mg2+, Observed dissassembly, detachment. Cut proximal to bead. piece of shit fell into trap		6	0	1
2020-08-03	20_0803_071321	7.9148	0.042842	10.367	4.2594	0.35	178.92	0.0683	Bead #5: Pre-loaded with 8 pN. 6 mM Mg2+, Observed dissassembly, detachment. Cut proximal to bead.		6	0	1
2020-08-03	20_0803_071653	5.8807	0.035676	17.649	5.2455	0.5	178.76	0.0683	Bead #6: Pre-loaded with 6 pN. 20 mM Mg2+, Observed dissassembly, detachment. Cut proximal to bead. possible MT bundle		20	0	1
2020-08-03	20_0803_071953	5.8451	0.13566	13.584	3.7714	0.12	177.54	0.0683	Bead #7: Pre-loaded with 6 pN. 20 mM Mg2+, Observed dissassembly, detachment. Cut proximal to bead. Laser possibly on when bead detached		20	1	1
2020-08-03	20_0803_072127	5.7427	0.036533	9.7313	4.3003	0.04	177.64	0.0683	Bead #8: Pre-loaded with 6 pN. 20 mM Mg2+, Observed dissassembly, detachment. Cut proximal to bead. Laser possibly on when bead detached		20	0	1
2020-08-03	20_0803_073120	5.668	0.016365	4.9892	2.7945	0.385	-179.84	0.0683	Bead #9: Pre-loaded with 6 pN. 20 mM Mg2+, Observed dissassembly, detachment. Cut proximal to bead.		20	0	1
2020-08-03	20_0803_073307	7.6635	0.018478	7.768	3.3508	0.22	-178.7	0.0683	Bead #10: Pre-loaded with 8 pN. 20 mM Mg2+, Observed dissassembly, detachment. Cut proximal to bead.		20	0	1
2020-08-03	20_0803_073646	7.6875	0.019301	13.639	3.0258	0.24	176.31	0.0683	Bead #11: Pre-loaded with 8 pN. 20 mM Mg2+, Observed dissassembly, detachment. Cut proximal to bead.		20	1	1
2020-08-03	20_0803_074105	5.7603	0.030761	12.784	4.536	0.215	174.58	0.0683	Bead #12: Pre-loaded with 6 pN. 20 mM Mg2+, Observed dissassembly, detachment. Cut proximal to bead.		20	0	1
2020-08-03	20_0803_074315	5.6182	0.052774	16.042	5.4279	0.415	174.64	0.0683	Bead #13: Pre-loaded with 6 pN. 20 mM Mg2+, Observed dissassembly, detachment. Cut proximal to bead.		20	0	1
2020-08-03	20_0803_074632	5.7009	0.045592	7.7193	7.5263	0.38	-176.19	0.0683	Bead #14: Pre-loaded with 6 pN. 20 mM Mg2+, Observed dissassembly, detachment. Cut proximal to bead.		20	0	1
2020-08-03	20_0803_075041	3.7979	0.037723	35.352	6.1313	0.84	-179.57	0.0683	Bead #15: Pre-loaded with 6 pN. 20 mM Mg2+, Observed dissassembly, detachment. Cut proximal to bead. possible bundle		20	1	1
2020-08-03	20_0803_075235	3.8718	0.028257	19.494	3.8262	0.32	179.22	0.0683	Bead #16: Pre-loaded with 4 pN. 20 mM Mg2+, Observed dissassembly, detachment. Cut proximal to bead.		20	1	1
2020-08-03	20_0803_075407	3.7136	0.022112	14.898	3.7306	0.54	179.13	0.0683	Bead #17: Pre-loaded with 4 pN. 20 mM Mg2+, Observed dissassembly, detachment. Cut proximal to bead.		20	1	1
2020-08-03	20_0803_075841	3.8713	0.050237	19.641	8.0047	0.38	177.13	0.0683	Bead #18: Pre-loaded with 4 pN. 20 mM Mg2+, Observed dissassembly, detachment. Cut proximal to bead.		20	0	1
2020-08-03	20_0803_080306	3.8003	0.053089	10.525	6.244	0.19	176.03	0.0683	Bead #19: Pre-loaded with 4 pN. 20 mM Mg2+, Observed dissassembly, detachment. Cut proximal to bead.		20	0	1
2020-08-03	20_0803_080406	3.7539	0.037078	6.09	6.8875	0.33	175.76	0.0683	Bead #20: Pre-loaded with 4 pN. 20 mM Mg2+, Observed dissassembly, detachment. Cut proximal to bead.		20	0	1
2020-08-03	20_0803_080651	5.8708	0.042752	3.4644	3.8197	0.64	-178.85	0.0683	Bead #22: Pre-loaded with 6 pN. 20 mM Mg2+, Observed dissassembly, detachment. Cut proximal to bead.		20	0	1
2020-08-03	20_0803_081058	5.7565	0.024716	12.333	3.3523	0.425	177.55	0.0683	Bead #23: Pre-loaded with 6 pN. 20 mM Mg2+, Observed dissassembly, detachment. Cut proximal to bead.		20	1	1
2020-08-03	20_0803_081213	5.7726	0.021038	10.201	2.4887	0.12	179.65	0.0683	Bead #24: Pre-loaded with 6 pN. 20 mM Mg2+, Observed dissassembly, detachment. Cut proximal to bead.		20	1	1
2020-08-03	20_0803_081653	5.8084	0.026996	16.911	4.2158	0.155	-179.39	0.0683	Bead #25: Pre-loaded with 6 pN. 20 mM Mg2+, Observed dissassembly, detachment. Cut proximal to bead.		20	1	1
2020-08-03	20_0803_081750	3.7775	0.025529	19.864	3.3249	0.17	178.74	0.0683	Bead #26: Pre-loaded with 4 pN. 20 mM Mg2+, Observed dissassembly, detachment. Cut proximal to bead.		20	1	1
2020-08-03	20_0803_083232	3.7939	0.04136	4.9584	7.7747	0.31	-178.42	0.0683	Bead #27: Pre-loaded with 4 pN. 20 mM Mg2+, Observed dissassembly, detachment. Cut proximal to bead.		20	0	1
2020-08-03	20_0803_083755	3.7658	0.021749	14.512	3.2533	0.165	175.41	0.0683	Bead #28: Pre-loaded with 4 pN. 20 mM Mg2+, Observed dissassembly, detachment. Cut proximal to bead.		20	1	0
2020-08-03	20_0803_083950	3.798	0.037192	23.167	4.1636	0.225	-177.31	0.0683	Bead #29: Pre-loaded with 4 pN. 20 mM Mg2+, Observed dissassembly, detachment. Cut proximal to bead. weird pre-load		20	1	1
2020-08-03	20_0803_084034	5.7987	0.033781	13.878	3.264	0.12	176.12	0.0683	Bead #30: Pre-loaded with 4 pN. 20 mM Mg2+, Observed dissassembly, detachment. Cut proximal to bead.		20	1	1
2020-08-03	20_0803_084917	5.6826	0.028757	11.758	2.7543	0.505	179.91	0.0683	Bead #31: Pre-loaded with 6 pN. 6 mM Mg2+, Observed dissassembly, detachment. Cut proximal to bead.		6	1	1
2020-08-04	20_0804_072253	5.5091	0.02893	4.7734	2.1081	0.16	177.72	0.0683	Bead #1: Pre-loaded with 6 pN. 1 mM Mg2+, Observed dissassembly, detachment. Cut proximal to bead.		6	0	1
2020-08-04	20_0804_072707	3.7737	0.036081	24.739	6.8816	1.175	177.32	0.0683	Bead #2: Pre-loaded with 4 pN. 1 mM Mg2+, Observed dissassembly, detachment. Cut proximal to bead.		1	0	1
2020-08-04	20_0804_072845	5.7373	0.029024	5.68	2.8729	0.25	179.58	0.0683	Bead #3: Pre-loaded with 6 pN. 1 mM Mg2+, Observed dissassembly, detachment. Cut proximal to bead.		1	0	1
2020-08-04	20_0804_072956	5.6992	0.034893	3.8126	4.3842	0.15	177.93	0.0683	Bead #4: Pre-loaded with 6 pN. 1 mM Mg2+, Observed dissassembly, detachment. Cut proximal to bead.		1	0	1
2020-08-04	20_0804_073347	3.7802	0.044327	11.782	3.4976	0.365	-178.55	0.0683	Bead #5: Pre-loaded with 4 pN. 1 mM Mg2+, Observed dissassembly, detachment. Cut proximal to bead.		1	0	1
2020-08-04	20_0804_073542	5.7668	0.040267	13.787	4.937	0.15	177	0.0683	Bead #6: Pre-loaded with 6 pN. 20 mM Mg2+, Observed dissassembly, detachment. Cut proximal to bead.		20	1	1
2020-08-04	20_0804_073842	3.678	0.028042	6.2868	4.0237	0.305	-178.83	0.0683	Bead #7: Pre-loaded with 4 pN. 20 mM Mg2+, Observed dissassembly, detachment. Cut proximal to bead.		20	0	1
2020-08-04	20_0804_074150	5.6927	0.043321	10.539	5.3331	0.4	-177.95	0.0683	Bead #8: Pre-loaded with 6 pN. 20 mM Mg2+, Observed dissassembly, detachment. Cut proximal to bead.		20	0	1
2020-08-04	20_0804_074809	7.807	0.016233	5.4118	3.4349	0.155	-176.95	0.0683	Bead #10: Pre-loaded with 8 pN. 20 mM Mg2+, Observed dissassembly, detachment. Cut proximal to bead.		20	0	1
2020-08-04	20_0804_075635	3.8459	0.055683	5.5665	5.4507	0.335	-179.63	0.0683	Bead #11: Pre-loaded with 4 pN. 20 mM Mg2+, Observed dissassembly, detachment. Cut proximal to bead.		20	0	1
2020-08-04	20_0804_075817	5.8989	0.027809	16.902	3.0266	0.16	178.83	0.0683	Bead #12: Pre-loaded with 6 pN. 20 mM Mg2+, Observed dissassembly, detachment. Cut proximal to bead.		20	1	1
2020-08-04	20_0804_080033	5.6901	0.057543	10.782	8.973	0.405	177.77	0.0683	Bead #13: Pre-loaded with 6 pN. 20 mM Mg2+, Observed dissassembly, detachment. Cut proximal to bead.		20	0	1
2020-08-04	20_0804_080404	5.9016	0.048233	11.15	4.7563	0.18	-176.34	0.0683	Bead #14: Pre-loaded with 6 pN. 1 mM Mg2+, Observed dissassembly, detachment. Cut proximal to bead.		1	0	1
2020-08-04	20_0804_081309	7.5716	0.024652	8.048	1.7533	0.525	176.06	0.0683	Bead #15: Pre-loaded with 8 pN. 1 mM Mg2+, Observed dissassembly, detachment. Cut proximal to bead.		1	1	1
2020-08-04	20_0804_081428	3.6536	0.035371	10.644	3.4639	0.12	179.13	0.0683	Bead #16: Pre-loaded with 4 pN. 1 mM Mg2+, Observed dissassembly, detachment. Cut proximal to bead.		1	0	1
2020-08-04	20_0804_081700	3.5121	0.042019	3.7749	7.1323	0.05	-179.32	0.0683	Bead #17: Pre-loaded with 4 pN. 1 mM Mg2+, Observed dissassembly, detachment. Cut proximal to bead.		1	0	1
2020-08-04	20_0804_082018	5.7607	0.034564	5.2326	3.193	0.525	177.59	0.0683	Bead #18: Pre-loaded with 6 pN. 1 mM Mg2+, Observed dissassembly, detachment. Cut proximal to bead.		1	0	1
2020-08-04	20_0804_082157	7.5853	0.035784	5.3219	3.7188	0.18	178.85	0.0683	Bead #19: Pre-loaded with 8 pN. 1 mM Mg2+, Observed dissassembly, detachment. Cut proximal to bead.		1	0	1
2020-08-04	20_0804_082418	3.8063	0.031943	13.493	3.9987	0.275	178.55	0.0683	Bead #20: Pre-loaded with 4 pN. 1 mM Mg2+, Observed dissassembly, detachment. Cut proximal to bead.		1	1	1
2020-08-04	20_0804_082523	7.8715	0.023032	7.0512	4.7515	0.18	177.67	0.0683	Bead #21: Pre-loaded with 8 pN. 20 mM Mg2+, Observed dissassembly, detachment. Cut proximal to bead.		20	0	1
2020-08-05	20_0805_051751	7.5966	0.032788	6.0187	3.1552	0.06	175.1	0.0683	Bead #1: Pre-loaded with 8 pN. 1 mM Mg2+, Observed dissassembly, detachment. Cut proximal to bead.		1	0	1
2020-08-05	20_0805_052152	5.6637	0.019801	6.4304	1.8303	0.545	175.4	0.0683	Bead #2: Pre-loaded with 6 pN. 1 mM Mg2+, Observed dissassembly, detachment. Cut proximal to bead.		1	0	1
2020-08-05	20_0805_052339	3.9584	0.017565	-1.777	2.7718	0	-177.01	0.0683	Bead #3: Pre-loaded with 4 pN. 1 mM Mg2+, Observed dissassembly, detachment. Cut proximal to bead. Laser on when bead detached		1	0	1
2020-08-05	20_0805_052707	6.1099	0.022982	8.7417	1.6572	0.16	-4.1201	0.0683	Bead #5: Pre-loaded with 6 pN. 1 mM Mg2+, Observed dissassembly, detachment. Cut proximal to bead.		1	0	1
2020-08-05	20_0805_052908	5.862	0.027628	5.8657	3.2732	0.28	-176.15	0.0683	Bead #6: Pre-loaded with 6 pN. 20 mM Mg2+, Observed dissassembly, detachment. Cut proximal to bead.		20	0	1
2020-08-05	20_0805_053457	5.7736	0.023172	18.552	2.9577	0.235	179.49	0.0683	Bead #7: Pre-loaded with 6 pN. 20 mM Mg2+, Observed dissassembly, detachment. Cut proximal to bead.		20	1	1
2020-08-05	20_0805_055256	7.6895	0.04688	6.3491	3.5241	0.395	-179.74	0.0683	Bead #8: Pre-loaded with 8 pN. 20 mM Mg2+, Observed dissassembly, detachment. Cut proximal to bead.		20	0	1
2020-08-05	20_0805_055451	5.7741	0.02408	7.7662	2.7262	0.26	179.39	0.0683	Bead #9: Pre-loaded with 6 pN. 20 mM Mg2+, Observed dissassembly, detachment. Cut proximal to bead.		20	0	1
2020-08-05	20_0805_060517	5.8344	0.050507	9.4095	2.7222	0.295	-178.66	0.0683	Bead #10: Pre-loaded with 6 pN. 20 mM Mg2+, Observed dissassembly, detachment. Cut proximal to bead.		20	1	1
2020-08-08	20_0808_083655	3.5839	0.066417	17.478	2.9648	0.22	-179.1	0.0683	Bead #1: Pre-loaded with 4 pN. 20 mM Mg2+, Observed dissassembly, detachment. Cut proximal to bead.		20	1	1
2020-08-08	20_0808_084738	3.5675	0.053446	8.6845	3.8022	0.245	-173.83	0.0683	Bead #2: Pre-loaded with 4 pN. 20 mM Mg2+, Observed dissassembly, detachment. Cut proximal to bead.		20	0	1
2020-08-08	20_0808_085258	5.3438	0.031586	10.898	3.1993	0.27	176.71	0.0683	Bead #3: Pre-loaded with 6 pN. 20 mM Mg2+, Observed dissassembly, detachment. Cut proximal to bead.		20	1	1
2020-08-08	20_0808_085619	3.6855	0.046216	13.016	5.6175	0.3	179.94	0.0683	Bead #4: Pre-loaded with 4 pN. 20 mM Mg2+, Observed dissassembly, detachment. Cut proximal to bead.		20	0	1
2020-08-08	20_0808_090027	5.7437	0.17485	13.694	2.652	0.08	179.88	0.0683	Bead #5: Pre-loaded with 6 pN. 20 mM Mg2+, Observed dissassembly, detachment. Cut proximal to bead.		20	1	1
2020-08-08	20_0808_091029	5.7111	0.19059	3.8234	5.2074	0.38	-177.42	0.0683	Bead #6: Pre-loaded with 6 pN. 6 mM Mg2+, Observed dissassembly, detachment. Cut proximal to bead.		6	0	1
2020-08-08	20_0808_092602	5.4999	0.032619	1.2406	3.6328	0.175	-179.32	0.0683	Bead #7: Pre-loaded with 6 pN. 6 mM Mg2+, Observed dissassembly, detachment. Cut proximal to bead.		6	0	1
2020-08-08	20_0808_092755	3.7919	0.016465	13.051	1.8045	0.25	-178.34	0.0683	Bead #8: Pre-loaded with 6 pN. 6 mM Mg2+, Observed dissassembly, detachment. Cut proximal to bead.		6	1	1
2020-08-08	20_0808_093043	3.6596	0.027734	12.084	2.9801	0.115	-175.82	0.0683	Bead #9: Pre-loaded with 4 pN. 6 mM Mg2+, Observed dissassembly, detachment. Cut proximal to bead.		6	1	1
2020-08-08	20_0808_093441	5.686	0.068364	11.564	4.0186	0.18	-176.68	0.0683	Bead #10: Pre-loaded with 6 pN. 6 mM Mg2+, Observed dissassembly, detachment. Cut proximal to bead.		6	0	1
2020-08-08	20_0808_093941	3.6792	0.062339	13.807	2.7797	0.14	-176.24	0.0683	Bead #11: Pre-loaded with 4 pN. 6 mM Mg2+, Observed dissassembly, detachment. Cut proximal to bead. Laser possible on during detachment		6	1	1
2020-08-08	20_0808_094043	3.833	0.061025	14.444	3.6788	0.185	-179.61	0.0683	Bead #12: Pre-loaded with 4 pN. 6 mM Mg2+, Observed dissassembly, detachment. Cut proximal to bead.		6	1	1
2020-08-08	20_0808_094410	5.7585	0.058843	3.7566	5.3993	0.07	-179.05	0.0683	Bead #13: Pre-loaded with 6 pN. 6 mM Mg2+, Observed dissassembly, detachment. Cut proximal to bead.		6	0	1
2020-08-08	20_0808_095432	5.8214	0.030646	13.909	1.9709	0.295	178.89	0.0683	Bead #14: Pre-loaded with 6 pN. 6 mM Mg2+, Observed dissassembly, detachment. Cut proximal to bead.		6	1	1
2020-08-08	20_0808_095704	5.781	0.074821	15.575	5.581	0.36	179.9	0.0683	Bead #15: Pre-loaded with 6 pN. 6 mM Mg2+, Observed dissassembly, detachment. Cut proximal to bead.		6	0	1
2020-08-08	20_0808_101318	5.6942	0.041613	6.4361	2.948	0.38	-178.25	0.0683	Bead #16: Pre-loaded with 6 pN. 6 mM Mg2+, Observed dissassembly, detachment. Cut proximal to bead.		6	0	1
2021-12-30	20_1230_073652	2.851	0.012788	11.754	2.0882	0.4	-174.26	0.0347	Bead #1: Pre-loaded with 3 pN. 1 mM Mg2+, Observed dissassembly, detachment.		1	1	1
2021-12-30	20_1230_075243	2.9022	0.015426	12.958	2.4786	0.155	179.01	0.0347	Bead #2: Pre-loaded with 3 pN. 1 mM Mg2+, Observed dissassembly, detachment.		1	1	1
2021-01-01	21_0101_064013	2.9055	0.012295	19.45	3.0541	0.845	-174.88	0.0347	Bead #1: Pre-loaded with 3 pN. 1 mM Mg2+, Observed dissassembly, detachment.		1	1	1
2021-01-01	21_0101_070620	2.8349	0.035116	11.003	5.9032	0.39	179.15	0.0347	Bead #2: Pre-loaded with 3 pN. 1 mM Mg2+, Observed dissassembly, detachment.		1	0	1
2021-01-01	21_0101_071200	2.8691	0.0075353	8.9677	2.1378	0.045	173.67	0.0347	Bead #3: Pre-loaded with 3 pN. 1 mM Mg2+, Observed dissassembly, detachment.		1	0	1
2021-01-01	21_0101_072454	2.9135	0.0098158	0.58073	2.015	0.14	179.48	0.0347	Bead #4: Pre-loaded with 3 pN. 1 mM Mg2+, Observed dissassembly, detachment.		1	0	1
2021-01-01	21_0101_073016	2.872	0.019001	15.441	2.9776	0.18	-179.33	0.0347	Bead #5: Pre-loaded with 3 pN. 1 mM Mg2+, Observed dissassembly, detachment.		1	1	1
2021-01-01	21_0101_073222	2.8359	0.012346	6.9591	1.7613	0.22	-178.74	0.0347	Bead #6: Pre-loaded with 3 pN. 1 mM Mg2+, Observed dissassembly, detachment.		1	1	1
2021-01-01	21_0101_073522	2.8953	0.014957	10.414	2.5796	0.21	-178.92	0.0347	Bead #7: Pre-loaded with 3 pN. 1 mM Mg2+, Observed dissassembly, detachment.		1	1	1
2021-01-01	21_0101_074548	2.9063	0.013405	11.05	4.0441	0.28	179.49	0.0347	Bead #8: Pre-loaded with 3 pN. 1 mM Mg2+, Observed dissassembly, detachment.		1	1	1
2021-01-01	21_0101_075345	3.8344	0.021132	12.173	5.2743	0.265	-175.72	0.0347	Bead #9: Pre-loaded with 4 pN. 1 mM Mg2+, Observed dissassembly, detachment.		1	0	1
2021-01-01	21_0101_080511	3.8541	0.020861	14.587	2.6303	0.19	-179.57	0.0347	Bead #10: Pre-loaded with 4 pN. 1 mM Mg2+, Observed dissassembly, detachment.		1	1	1
2021-01-01	21_0101_082533	3.8826	0.02509	23.547	7.5311	0.205	179.93	0.0347	Bead #11: Pre-loaded with 4 pN. 1 mM Mg2+, Observed dissassembly, detachment.		1	1	1
2021-01-04	21_0104_055153	2.7154	0.014096	3.1465	2.7984	0.44	-174.57	0.0347	Bead #1: Pre-loaded with 3 pN. 1 mM Mg2+, Observed dissassembly, detachment. Very short MT		1	0	1
2021-01-04	21_0104_055415	2.8753	0.020768	8.9669	4.7349	0.7	-174.47	0.0347	Bead #2: Pre-loaded with 3 pN. 1 mM Mg2+, Observed dissassembly, detachment.		1	0	1
2021-01-04	21_0104_060304	2.8803	0.014476	11.748	3.1262	0.38	-174.33	0.0347	Bead #3: Pre-loaded with 3 pN. 1 mM Mg2+, Observed dissassembly, detachment.	`	1	1	1
2021-01-04	21_0104_060501	2.8462	0.011785	6.2872	2.147	0.34	-177.85	0.0347	Bead #4: Pre-loaded with 3 pN. 1 mM Mg2+, Observed dissassembly, detachment.		1	0	1
2021-01-04	21_0104_063145	3.7891	0.015738	11.327	3.1103	0.185	178.36	0.0347	Bead #5: Pre-loaded with 4 pN. 1 mM Mg2+, Observed dissassembly, detachment.		1	0	1
2021-01-04	21_0104_063604	3.903	0.032822	14.976	4.1481	0.1	-178.09	0.0347	Bead #6: Pre-loaded with 4 pN. 1 mM Mg2+, Observed dissassembly, detachment.		1	1	1
2020-01-06	21_0106_054704	2.7452	0.0098563	13.091	2.8846	0.245	175.56	0.0347	Bead #2: Pre-loaded with 3 pN. 1 mM Mg2+, Observed dissassembly, detachment.		1	1	1
2020-01-06	21_0106_054842	2.8003	0.011242	17.453	2.3512	0.16	-178.44	0.0347	Bead #3: Pre-loaded with 3 pN. 1 mM Mg2+, Observed dissassembly, detachment.		1	1	1
2020-01-06	21_0106_055445	2.7436	0.01051	10.771	2.7554	0.235	-178.17	0.0347	Bead #4: Pre-loaded with 3 pN. 1 mM Mg2+, Observed dissassembly, detachment.		1	1	1
2020-01-06	21_0106_055745	3.7107	0.020753	4.5057	4.1261	0.325	-179.99	0.0347	Bead #5: Pre-loaded with 3 pN. 1 mM Mg2+, Observed dissassembly, detachment. Weird, short MT.		1	0	1
2020-01-06	21_0106_060143	3.7296	0.0086057	9.772	2.8165	0.18	-179.75	0.0347	Bead #6: Pre-loaded with 3 pN. 1 mM Mg2+, Observed dissassembly, detachment.		1	1	1
2020-01-06	21_0106_060400	3.9123	0.01119	10.306	2.527	0.39	-177.56	0.0347	Bead #7: Pre-loaded with 4 pN. 1 mM Mg2+, Observed dissassembly, detachment.		1	1	1
2020-01-06	21_0106_061051	2.9086	0.025617	15.91	2.9523	0.12	179.68	0.0347	Bead #8: Pre-loaded with 3 pN. 1 mM Mg2+, Observed dissassembly, detachment.		1	1	1
2020-01-06	21_0106_061234	3.1796	0.010409	12.115	1.6641	0.325	-3.0781	0.0347	Bead #9: Pre-loaded with 3 pN. 1 mM Mg2+, Observed dissassembly, detachment.		1	1	1
2020-01-06	21_0106_062251	2.7965	0.0094899	7.9167	2.7279	0.18	179.41	0.0347	Bead #10: Pre-loaded with 3 pN. 1 mM Mg2+, Observed dissassembly, detachment.		1	0	1
2020-01-06	21_0106_063450	3.8036	0.032166	19.289	2.6556	0.195	179.58	0.0347	Bead #12: Pre-loaded with 4 pN. 1 mM Mg2+, Observed dissassembly, detachment.		1	1	1
2021-01-07	21_0107_052423	2.834	0.011046	9.4075	2.2119	0.28	177.24	0.0347	Bead #1: Pre-loaded with 3 pN. 1 mM Mg2+, Observed dissassembly, detachment.		1	1	1
2021-01-07	21_0107_053446	2.7866	0.016199	17.946	3.2433	0.2	177.01	0.0347	Bead #2: Pre-loaded with 3 pN. 1 mM Mg2+, Observed dissassembly, detachment.		1	1	1
2021-01-07	21_0107_053655	2.8108	0.011467	9.8851	2.9513	0.205	179.14	0.0347	Bead #3: Pre-loaded with 3 pN. 1 mM Mg2+, Observed dissassembly, detachment.		1	1	1
2021-01-07	21_0107_053838	3.7878	0.013387	9.8944	1.9398	0.145	179.48	0.0347	Bead #4: Pre-loaded with 4 pN. 1 mM Mg2+, Observed dissassembly, detachment.		1	1	1
2021-01-07	21_0107_054054	3.6973	0.0099625	9.8592	2.547	0.095	179.73	0.0347	Bead #5: Pre-loaded with 4 pN. 1 mM Mg2+, Observed dissassembly, detachment.		1	1	1
2021-01-07	21_0107_054207	2.8043	0.023874	22.045	9.4549	0.155	-179.73	0.0347	Bead #6: Pre-loaded with 3 pN. 1 mM Mg2+, Observed dissassembly, detachment.		1	0	1
2021-01-07	21_0107_054540	2.7611	0.015363	12.855	2.5683	0.2	-177.14	0.0347	Bead #7: Pre-loaded with 3 pN. 1 mM Mg2+, Observed dissassembly, detachment.		1	1	1
2021-01-07	21_0107_054744	2.8617	0.042709	11.098	6.45	0.23	-178.44	0.0347	Bead #8: Pre-loaded with 3 pN. 1 mM Mg2+, Observed dissassembly, detachment. Long MT		1	0	1
2021-01-07	21_0107_055230	3.8163	0.028136	9.332	2.5639	0.14	-176.36	0.0347	Bead #9: Pre-loaded with 3 pN. 1 mM Mg2+, Observed dissassembly, detachment.		1	1	1
2021-01-07	21_0107_055350	2.7873	0.010148	2.8988	2.3757	0.26	-175.5	0.0347	Bead #10: Pre-loaded with 3 pN. 1 mM Mg2+, Observed dissassembly, detachment.		1	0	1
2021-01-07	21_0107_060501	2.6767	0.012778	11.948	2.4394	0.22	-178.3	0.0347	Bead #11: Pre-loaded with 3 pN. 1 mM Mg2+, Observed dissassembly, detachment.		1	1	1
2021-01-07	21_0107_061351	1.6128	0.033565	30.451	9.5995	0.4	-177.69	0.0347	Bead #12: Pre-loaded with 2 pN. 1 mM Mg2+, Observed dissassembly, detachment.		1	1	1
2021-01-07	21_0107_061728	1.7513	0.015237	10.701	2.8356	0.19	-176.01	0.0347	Bead #13: Pre-loaded with 2 pN. 1 mM Mg2+, Observed dissassembly, detachment.		1	1	1
2021-01-07	21_0107_062820	2.8539	0.013117	10.229	2.649	0.14	-177.77	0.0347	Bead #14: Pre-loaded with 3 pN. 1 mM Mg2+, Observed dissassembly, detachment.		1	1	1
2021-01-07	21_0107_062946	2.7879	0.0063873	16.201	2.4685	0.23	175.72	0.0347	Bead #15: Pre-loaded with 3 pN. 1 mM Mg2+, Observed dissassembly, detachment.		1	1	1
2021-01-07	21_0107_063217	2.8009	0.038801	19.253	10.232	0.14	-173.91	0.0347	Bead #16: Pre-loaded with 3 pN. 1 mM Mg2+, Observed dissassembly, detachment.		1	0	1
2021-01-07	21_0107_063818	2.7472	0.0088866	3.708	4.5405	0.385	-179.16	0.0347	Bead #17: Pre-loaded with 3 pN. 1 mM Mg2+, Observed dissassembly, detachment.		1	0	1
2021-01-07	21_0107_064300	2.8633	0.017456	13.266	2.5054	0.12	-177.66	0.0347	Bead #18: Pre-loaded with 3 pN. 1 mM Mg2+, Observed dissassembly, detachment.		1	1	1
2021-01-07	21_0107_064912	2.8091	0.011703	11.116	2.0262	0.11	-177.43	0.0347	Bead #20: Pre-loaded with 3 pN. 1 mM Mg2+, Observed dissassembly, detachment. spontaneous disassembly		1	1	1
2021-01-07	21_0107_065514	2.8922	0.024354	10.825	3.4497	0.2	-176.94	0.0347	Bead #21: Pre-loaded with 3 pN. 1 mM Mg2+, Observed dissassembly, detachment.		1	0	1
2021-01-07	21_0107_070007	2.8332	0.020298	19.084	4.0298	0.24	-177.37	0.0347	Bead #22: Pre-loaded with 3 pN. 1 mM Mg2+, Observed dissassembly, detachment.		1	1	1
2021-01-13	21_0113_064919	2.8687	0.015053	6.645	2.8904	0.33	-177.9	0.0347	Bead #1: Pre-loaded with 3 pN. 1 mM Mg2+, Observed dissassembly, detachment.		1	0	1
2021-01-13	21_0113_065358	2.8042	0.017707	11.469	3.2703	0.12	-179.77	0.0347	Bead #2: Pre-loaded with 3 pN. 1 mM Mg2+, Observed dissassembly, detachment.		1	1	1
2021-01-13	21_0113_065552	2.9862	0.012916	9.3703	1.8305	0.08	-176.56	0.0347	Bead #3: Pre-loaded with 3 pN. 1 mM Mg2+, Observed dissassembly, detachment.		1	1	1
2021-01-13	21_0113_065849	3.8437	0.011789	9.9388	3.2262	0.225	-177.31	0.0347	Bead #4: Pre-loaded with 4 pN. 1 mM Mg2+, Observed dissassembly, detachment.		1	1	1
2021-01-13	21_0113_070000	3.8913	0.028702	12.997	6.4307	0.04	179.56	0.0347	Bead #5: Pre-loaded with 4 pN. 1 mM Mg2+, Observed dissassembly, detachment.		1	0	1
2021-01-13	21_0113_070237	3.1235	0.030517	17.169	3.8612	0.18	0.04998	0.0347	Bead #6: Pre-loaded with 3 pN. 1 mM Mg2+, Observed dissassembly, detachment.		1	1	1
2021-01-13	21_0113_070515	4.1049	0.019451	8.7703	3.5655	0.08	-1.4934	0.0347	Bead #7: Pre-loaded with 4 pN. 1 mM Mg2+, Observed dissassembly, detachment.		1	0	1
2021-01-13	21_0113_070735	1.8009	0.02767	9.1261	3.7278	0.265	-175.78	0.0347	Bead #8: Pre-loaded with 2 pN. 1 mM Mg2+, Observed dissassembly, detachment.		1	0	1
2021-01-13	21_0113_070900	1.8397	0.01536	27.802	2.5359	0.125	178.84	0.0347	Bead #9: Pre-loaded with 2 pN. 12 mM Mg2+, Observed dissassembly, detachment.		12	1	1
2021-01-13	21_0113_071151	2.8455	0.016409	9.8618	4.5239	0.645	-179.56	0.0347	Bead #10: Pre-loaded with 3 pN. 12 mM Mg2+, Observed dissassembly, detachment.		12	0	12
2021-01-13	21_0113_072247	2.7937	0.017559	6.1482	4.5143	0.715	-178.94	0.0347	Bead #11: Pre-loaded with 3 pN. 1 mM Mg2+, Observed dissassembly, detachment.		1	0	1
2021-01-13	21_0113_072607	3.7155	0.01482	10.04	2.6201	0.08	179.38	0.0347	Bead #12: Pre-loaded with 4 pN. 1 mM Mg2+, Observed dissassembly, detachment.		1	1	1
2021-01-13	21_0113_072755	1.8255	0.01643	16.432	3.5667	0.265	179.73	0.0347	Bead #13: Pre-loaded with 2 pN. 1 mM Mg2+, Observed dissassembly, detachment.		1	0	1
2021-01-13	21_0113_072855	3.1574	0.014516	3.5629	3.4459	0.66	2.6193	0.0347	Bead #14: Pre-loaded with 3 pN. 1 mM Mg2+, Observed dissassembly, detachment.		1	0	1
2021-01-13	21_0113_073908	3.7981	0.019182	16.036	4.4058	0.175	-179.72	0.0347	Bead #16: Pre-loaded with 4 pN. 1 mM Mg2+, Observed dissassembly, detachment.		1	1	1
2021-01-13	21_0113_074039	2.9194	0.011972	9.5588	2.1213	0.245	178.83	0.0347	Bead #17: Pre-loaded with 3 pN. 1 mM Mg2+, Observed dissassembly, detachment.		1	1	1
2021-01-13	21_0113_074358	2.7485	0.01793	10.37	3.9775	0.205	179.01	0.0347	Bead #18: Pre-loaded with 3 pN. 1 mM Mg2+, Observed dissassembly, detachment.		1	0	1
2021-01-13	21_0113_074734	3.8274	0.01959	16.26	4.8601	0.34	-179.24	0.0347	Bead #19: Pre-loaded with 4 pN. 1 mM Mg2+, Observed dissassembly, detachment. Long MT		1	1	1
2021-01-13	21_0113_074922	3.8685	0.023362	-0.21488	3.1732	0.285	176.02	0.0347	Bead #20: Pre-loaded with 4 pN. 1 mM Mg2+, Observed dissassembly, detachment. Long MT		1	0	1
2021-01-13	21_0113_075531	2.8974	0.037234	20.301	9.4694	0.14	177.66	0.0347	Bead #21: Pre-loaded with 3 pN. 1 mM Mg2+, Observed dissassembly, detachment.		1	0	1
2021-01-13	21_0113_080045	3.909	0.013261	5.5338	3.7685	0.14	179.72	0.0347	Bead #22: Pre-loaded with 4 pN. 1 mM Mg2+, Observed dissassembly, detachment.		1	0	1
2021-01-13	21_0113_080642	2.8194	0.015841	9.9834	4.939	0.38	176.33	0.0347	Bead #24: Pre-loaded with 3 pN. 1 mM Mg2+, Observed dissassembly, detachment.		1	0	1
2021-01-13	21_0113_080925	3.8147	0.012488	5.6654	2.9595	0.515	179.43	0.0347	Bead #25: Pre-loaded with 4 pN. 1 mM Mg2+, Observed dissassembly, detachment.		1	0	1
2021-01-13	21_0113_081112	2.8357	0.03736	20.84	12.832	0.52	178.84	0.0347	Bead #26: Pre-loaded with 3 pN. 1 mM Mg2+, Observed dissassembly, detachment.		1	0	1
2021-01-13	21_0113_081533	2.7884	0.035978	11.955	8.97	0.39	-177	0.0347	Bead #28: Pre-loaded with 3 pN. 1 mM Mg2+, Observed dissassembly, detachment.		1	0	1
2021-01-13	21_0113_081630	2.8149	0.017227	6.3637	2.5925	0.13	-177.82	0.0347	Bead #29: Pre-loaded with 3 pN. 1 mM Mg2+, Observed dissassembly, detachment.		1	0	1
2021-01-13	21_0113_081928	2.9087	0.014513	3.826	3.1498	0.4	179.99	0.0347	Bead #30: Pre-loaded with 3 pN. 1 mM Mg2+, Observed dissassembly, detachment.		1	0	1
2021-01-13	21_0113_082037	3.7599	0.011467	5.1244	3.5939	0.245	-178.2	0.0347	Bead #31: Pre-loaded with 4 pN. 1 mM Mg2+, Observed dissassembly, detachment.		1	0	1
2021-01-13	21_0113_082321	3.7433	0.023524	6.966	2.9089	0.265	-174.19	0.0347	Bead #32: Pre-loaded with 4 pN. 1 mM Mg2+, Observed dissassembly, detachment.		1	0	1
2021-01-13	21_0113_082735	3.129	0.025233	22.297	1.9828	0.145	1.5849	0.0347	Bead #33: Pre-loaded with 3 pN. 1 mM Mg2+, Observed dissassembly, detachment.		1	1	1
2021-01-13	21_0113_083016	2.8257	0.025497	5.8691	8.25	0.275	-179.64	0.0347	Bead #34: Pre-loaded with 3 pN. 1 mM Mg2+, Observed dissassembly, detachment.		1	0	1
2021-01-13	21_0113_083243	2.9001	0.017978	7.9606	3.7259	0.16	177.68	0.0347	Bead #35: Pre-loaded with 3 pN. 1 mM Mg2+, Observed dissassembly, detachment.		1	0	1
2021-01-13	21_0113_083352	2.859	0.022848	11.411	4.4311	0.305	177.87	0.0347	Bead #36: Pre-loaded with 3 pN. 1 mM Mg2+, Observed dissassembly, detachment.		1	0	1
2021-01-13	21_0113_083603	3.9051	0.012716	14.84	5.3096	0.31	178.53	0.0347	Bead #37: Pre-loaded with 4 pN. 1 mM Mg2+, Observed dissassembly, detachment.		1	0	1
2021-01-13	21_0113_084102	3.7315	0.017556	4.7529	4.9209	0.065	178.49	0.0347	Bead #38: Pre-loaded with 4 pN. 1 mM Mg2+, Observed dissassembly, detachment.		1	0	1
2021-01-13	21_0113_084527	3.7755	0.039783	26.725	10.402	0.235	179.61	0.0347	Bead #40: Pre-loaded with 4 pN. 1 mM Mg2+, Observed dissassembly, detachment.		1	0	1
2021-01-27	21_0127_035238	3.7438	0.018761	9.3818	3.3981	0.2	-176.04	0.0347	Bead #1: Pre-loaded with 4 pN. 12 mM Mg2+, Observed dissassembly, detachment.		12	1	1
2021-01-27	21_0127_041135	3.9809	0.024552	18.58	5.209	0.215	-179.75	0.0347	Bead #2: Pre-loaded with 4 pN. 12 mM Mg2+, Observed dissassembly, detachment.		12	1	1
2021-01-27	21_0127_041934	3.8457	0.04936	26.413	8.0198	0.25	-178.48	0.0347	Bead #3: Pre-loaded with 4 pN. 12 mM Mg2+, Observed dissassembly, detachment.		12	1	1
2021-01-27	21_0127_042623	3.8064	0.022955	22.246	7.3258	0.51	-179.15	0.0347	Bead #4: Pre-loaded with 4 pN. 12 mM Mg2+, Observed dissassembly, detachment.		12	1	1
2021-03-11	21_0311_045752	3.7389	0.11626	23.754	2.4455	0.08	-167.99	0.0347	Bead #1: Pre-loaded with 4 pN. 12 mM Mg2+, Observed dissassembly, detachment.		12	1	1
2021-03-11	21_0311_053034	3.7965	0.01998	7.3763	6.2038	0.3	-179.91	0.0347	Bead #2: Pre-loaded with 4 pN. 12 mM Mg2+, Observed dissassembly, detachment.		12	0	1
2021-03-11	21_0311_055014	3.877	0.020399	25.469	4.3833	0.32	179.86	0.0347	Bead #3: Pre-loaded with 4 pN. 12 mM Mg2+, Observed dissassembly, detachment.		12	1	1
2021-03-15	21_0315_030701	3.7581	0.0093658	16.483	4.1821	0.265	179.05	0.0347	Bead #1: Pre-loaded with 4 pN. 12 mM Mg2+, Observed dissassembly, detachment.		12	1	1
2021-03-16	21_0316_013053	3.8954	0.01597	11.262	4.0701	0.255	178.67	0.0347	Bead #1: Pre-loaded with 4 pN. 12 mM Mg2+, Observed dissassembly, detachment.		12	1	1
2021-03-16	21_0316_014353	3.8737	0.016698	4.6526	4.9957	0.185	178.86	0.0347	Bead #2: Pre-loaded with 4 pN. 12 mM Mg2+, Observed dissassembly, detachment. Weird detachment.		12	0	1
2021-03-16	21_0316_015952	3.8625	0.024747	9.3306	3.7649	0.325	177.95	0.0347	Bead #3: Pre-loaded with 4 pN. 12 mM Mg2+, Observed dissassembly, detachment. Ideal		12	0	1
2021-03-16	21_0316_020053	3.8488	0.015303	8.2556	3.54	0.43	-177.18	0.0347	Bead #4: Pre-loaded with 4 pN. 12 mM Mg2+, Observed dissassembly, detachment. (beads 1,2,3,4 all in 3 µL yTub channel)		12	0	1
2021-03-16	21_0316_020440	3.7635	0.0076441	2.2287	2.5488	0.1	173.6	0.0347	Bead #6: Pre-loaded with 4 pN. 12 mM Mg2+, Observed dissassembly, detachment. very short MT. 3 µL yTub channel		12	0	1
2021-03-16	21_0316_020716	3.9448	0.033704	11.296	3.3173	0.15	175.5	0.0347	Bead #7: Pre-loaded with 4 pN. 12 mM Mg2+, Observed dissassembly, detachment. 3 µL yTub channel		12	1	1
2021-03-16	21_0316_054631	3.951	0.011633	16.246	2.7603	0.36	-178.75	0.0347	Bead #1: Pre-loaded with 4 pN. 12 mM Mg2+, Observed dissassembly, detachment. 0.2 µL yTub in beads		12	1	1
2021-03-16	21_0316_055346	4.3956	0.021162	26.477	3.1453	0.15	-179.97	0.0347	Bead #2: Pre-loaded with 4 pN. 12 mM Mg2+, Observed dissassembly, detachment. 0.2 µL yTub in beads		12	1	1
2021-03-16	21_0316_060146	3.9059	0.0075614	21.197	3.1578	0.265	-175.89	0.0347	Bead #3: Pre-loaded with 4 pN. 12 mM Mg2+, Observed dissassembly, detachment. 0.2 µL yTub in beads		12	1	1
2021-03-16	21_0316_060632	3.8519	0.023457	15.338	4.8761	0.145	-175.14	0.0347	Bead #4: Pre-loaded with 4 pN. 12 mM Mg2+, Observed dissassembly, detachment. 0.2 µL yTub in beads		12	0	1
2021-03-16	21_0316_061118	3.828	0.050763	16.181	3.5293	0.08	179.82	0.0347	Bead #5: Pre-loaded with 4 pN. 12 mM Mg2+, Observed dissassembly, detachment. 0.2 µL yTub in beads		12	1	1
2021-03-16	21_0316_061551	3.8573	0.010557	15.983	3.2065	0.4	-179.92	0.0347	Bead #6: Pre-loaded with 4 pN. 12 mM Mg2+, Observed dissassembly, detachment. 0.04 µL yTub in beads		12	1	1
2021-03-16	21_0316_061823	3.8475	0.02986	12.944	7.8168	0.31	-179.5	0.0347	Bead #7: Pre-loaded with 4 pN. 12 mM Mg2+, Observed dissassembly, detachment. 0.04 µL yTub in beads		12	0	1
2021-03-16	21_0316_062500	3.964	0.015206	20.773	5.669	0.16	-177.09	0.0347	Bead #8: Pre-loaded with 4 pN. 12 mM Mg2+, Observed dissassembly, detachment. 0.2 µL yTub in beads		12	1	1
2021-03-16	21_0316_063934	3.9468	0.02206	32.058	2.6119	0.17	179.04	0.0347	Bead #9: Pre-loaded with 4 pN. 12 mM Mg2+, Observed dissassembly, detachment. 0.2 µL yTub in beads		12	1	1
2021-03-16	21_0316_065000	3.7424	0.017738	21.657	4.1594	0.21	-176.73	0.0347	Bead #10: Pre-loaded with 4 pN. 12 mM Mg2+, Observed dissassembly, detachment. 0.2 µL yTub in beads		12	1	1
2021-03-16	21_0316_065509	3.8063	0.046702	24.414	8.5568	0.26	-178.4	0.0347	Bead #11: Pre-loaded with 4 pN. 12 mM Mg2+, Observed dissassembly, detachment. 0.2 µL yTub in beads		12	0	1
2021-03-16	21_0316_070439	3.8841	0.031	16.672	4.9433	0.11	177.9	0.0347	Bead #12: Pre-loaded with 4 pN. 12 mM Mg2+, Observed dissassembly, detachment. 0.2 µL yTub in beads		12	1	1
2021-03-16	21_0316_071131	3.7589	0.033727	30.332	4.0806	0.1	-175.79	0.0347	Bead #13: Pre-loaded with 4 pN. 12 mM Mg2+, Observed dissassembly, detachment. 0.2 µL yTub in beads		12	1	1
2021-03-16	21_0316_071403	2.9456	0.020141	23.321	3.5357	0.23	-178.1	0.0347	Bead #14: Pre-loaded with 4 pN. 12 mM Mg2+, Observed dissassembly, detachment. 0.2 µL yTub in beads		12	1	1
2021-03-16	21_0316_071621	2.9298	0.017924	14.113	2.1353	0.26	-178.65	0.0347	Bead #15: Pre-loaded with 3 pN. 12 mM Mg2+, Observed dissassembly, detachment. 0.2 µL yTub in beads		12	1	1
2021-03-16	21_0316_071755	2.9457	0.027628	11.838	3.1105	0.14	-178.04	0.0347	Bead #16: Pre-loaded with 3 pN. 12 mM Mg2+, Observed dissassembly, detachment. 0.2 µL yTub in beads		12	1	1
2021-03-16	21_0316_072234	2.8307	0.016349	9.724	4.2081	0.12	-177.43	0.0347	Bead #17: Pre-loaded with 3 pN. 12 mM Mg2+, Observed dissassembly, detachment. 0.2 µL yTub in beads		12	0	1
2021-03-16	21_0316_072338	2.852	0.03476	26.471	4.6165	0.29	-178.4	0.0347	Bead #18: Pre-loaded with 3 pN. 12 mM Mg2+, Observed dissassembly, detachment. 0.2 µL yTub in beads		12	1	1
2021-03-16	21_0316_073622	2.9348	0.013708	19.385	3.295	0.52	-176.8	0.0347	Bead #19: Pre-loaded with 3 pN. 12 mM Mg2+, Observed dissassembly, detachment. 0.2 µL yTub in beads		12	1	1
2021-03-16	21_0316_073815	3.8857	0.016343	26.954	4.8513	0.21	179.84	0.0347	Bead #20: Pre-loaded with 4 pN. 12 mM Mg2+, Observed dissassembly, detachment. 0.2 µL yTub in beads		12	1	1
2021-03-17	21_0317_023334	3.7634	0.017608	11.911	6.4461	0.14	-179.05	0.0347	Bead #1: Pre-loaded with 4 pN. 1 mM Mg2+, Observed dissassembly, detachment. 0.4 µL yTub in beads		1	0	1
2021-03-17	21_0317_023726	3.8398	0.011571	8.2928	3.4171	0.305	179.1	0.0347	Bead #2: Pre-loaded with 4 pN. 1 mM Mg2+, Observed dissassembly, detachment. 0.4 µL yTub in beads		1	0	1
2021-03-17	21_0317_023839	2.8208	0.013743	14.944	5.3594	0.17	-172.11	0.0347	Bead #3: Pre-loaded with 3 pN. 1 mM Mg2+, Observed dissassembly, detachment. 0.4 µL yTub in beads		1	0	1
2021-03-17	21_0317_024117	2.804	0.017974	12.306	2.0476	0.2	-178.44	0.0347	Bead #4: Pre-loaded with 3 pN. 1 mM Mg2+, Observed dissassembly, detachment. 0.4 µL yTub in beads		1	1	1
2021-03-17	21_0317_024414	1.9417	0.016689	12.282	2.8545	0.22	178.87	0.0347	Bead #5: Pre-loaded with 2 pN. 1 mM Mg2+, Observed dissassembly, detachment. 0.4 µL yTub in beads		1	1	1
2021-03-17	21_0317_024540	1.8379	0.021717	3.0285	4.7153	0.255	179.2	0.0347	Bead #6: Pre-loaded with 2 pN. 1 mM Mg2+, Observed dissassembly, detachment. 0.4 µL yTub in beads		1	0	1
2021-03-17	21_0317_024848	1.8276	0.0088984	9.3925	3.0364	0.275	-174.48	0.0347	Bead #7: Pre-loaded with 2 pN. 1 mM Mg2+, Observed dissassembly, detachment. 0.4 µL yTub in beads		1	0	1
2021-03-17	21_0317_025027	2.0072	0.011235	6.8765	2.1361	0.21	-9.2204	0.0347	Bead #8: Pre-loaded with 2 pN. 1 mM Mg2+, Observed dissassembly, detachment. 0.4 µL yTub in beads		1	0	1
2021-03-17	21_0317_025137	1.8446	0.014955	11.135	2.6098	0.19	-176.84	0.0347	Bead #9: Pre-loaded with 2 pN. 1 mM Mg2+, Observed dissassembly, detachment. 0.4 µL yTub in beads		1	1	1
2021-03-17	21_0317_025312	1.8407	0.018707	12.413	2.4723	0.28	177.41	0.0347	Bead #10: Pre-loaded with 2 pN. 1 mM Mg2+, Observed dissassembly, detachment. 0.4 µL yTub in beads		1	1	1
2021-03-17	21_0317_025429	1.958	0.025972	12.799	2.4282	0.195	-179.23	0.0347	Bead #11: Pre-loaded with 2 pN. 1 mM Mg2+, Observed dissassembly, detachment. 0.4 µL yTub in beads		1	1	1
2021-03-17	21_0317_025605	1.853	0.019386	7.5253	2.3399	0.34	-179.08	0.0347	Bead #12: Pre-loaded with 2 pN. 1 mM Mg2+, Observed dissassembly, detachment. 0.4 µL yTub in beads		1	0	1
2021-03-17	21_0317_025904	1.9694	0.012294	5.048	6.3518	0.085	-175.72	0.0347	Bead #13: Pre-loaded with 2 pN. 1 mM Mg2+, Observed dissassembly, detachment. 0.4 µL yTub in beads		1	0	1
2021-03-17	21_0317_030042	2.8612	0.018943	24.913	5.9789	0.17	-175.44	0.0347	Bead #14: Pre-loaded with 3 pN. 12 mM Mg2+, Observed dissassembly, detachment. 0.4 µL yTub in beads		12	1	1
2021-03-17	21_0317_030805	2.8625	0.022907	17.379	3.2468	0.185	-178.97	0.0347	Bead #15: Pre-loaded with 3 pN. 12 mM Mg2+, Observed dissassembly, detachment. 0.4 µL yTub in beads		12	1	1
2021-03-17	21_0317_031019	2.8774	0.0065002	20.668	2.7312	0.305	-179.65	0.0347	Bead #16: Pre-loaded with 3 pN. 12 mM Mg2+, Observed dissassembly, detachment. 0.4 µL yTub in beads		12	1	1
2021-03-17	21_0317_032017	2.7934	0.034248	6.5886	8.4523	0.56	179.42	0.0347	Bead #17: Pre-loaded with 3 pN. 12 mM Mg2+, Observed dissassembly, detachment. 0.4 µL yTub in beads		12	0	1
2021-03-17	21_0317_032112	3.9474	0.017615	4.6332	3.2445	0.34	178.39	0.0347	Bead #18: Pre-loaded with 4 pN. 1 mM Mg2+, Observed dissassembly, detachment. 0.4 µL yTub in beads		1	0	1
2021-03-17	21_0317_033033	3.8913	0.019003	19.55	5.1684	0.34	179.17	0.0347	Bead #19: Pre-loaded with 4 pN. 1 mM Mg2+, Observed dissassembly, detachment. 0.4 µL yTub in beads		1	1	1
2021-03-17	21_0317_033402	3.871	0.0096833	15.213	2.6895	0.315	-179.2	0.0347	Bead #20: Pre-loaded with 4 pN. 1 mM Mg2+, Observed dissassembly, detachment. 0.4 µL yTub in beads		1	1	1
2021-03-17	21_0317_033528	3.9443	0.017842	4.707	2.8641	0.125	-179.6	0.0347	Bead #21: Pre-loaded with 4 pN. 1 mM Mg2+, Observed dissassembly, detachment. 0.4 µL yTub in beads		1	0	1
2021-03-17	21_0317_033900	3.8724	0.020228	13.868	5.2956	0.47	179.56	0.0347	Bead #22: Pre-loaded with 4 pN. 1 mM Mg2+, Observed dissassembly, detachment. 0.4 µL yTub in beads		1	0	1
2021-03-17	21_0317_034113	3.7093	0.0091231	6.3434	2.3978	0.24	179.72	0.0347	Bead #23: Pre-loaded with 4 pN. 1 mM Mg2+, Observed dissassembly, detachment. 0.4 µL yTub in beads		1	0	1
2021-03-17	21_0317_035001	4.1177	0.014393	11.212	3.4535	0.32	-2.1023	0.0347	Bead #24: Pre-loaded with 4 pN. 1 mM Mg2+, Observed dissassembly, detachment. 0.4 µL yTub in beads		1	1	1
2021-03-17	21_0317_035239	3.0225	0.013463	15.698	2.6916	0.09	-179.12	0.0347	Bead #25: Pre-loaded with 4 pN. 1 mM Mg2+, Observed dissassembly, detachment. 0.4 µL yTub in beads		1	1	1
2021-03-17	21_0317_035516	2.814	0.017823	12.886	4.9578	0.21	178.35	0.0347	Bead #26: Pre-loaded with 4 pN. 1 mM Mg2+, Observed dissassembly, detachment. 0.4 µL yTub in beads		1	0	1
2021-03-17	21_0317_040049	2.9523	0.018873	11.7	2.6802	0.35	177.92	0.0347	Bead #27: Pre-loaded with 4 pN. 1 mM Mg2+, Observed dissassembly, detachment. 0.4 µL yTub in beads		1	0	1
2021-03-17	21_0317_040228	2.9825	0.018733	11.254	2.208	0.125	0.13242	0.0347	Bead #28: Pre-loaded with 4 pN. 1 mM Mg2+, Observed dissassembly, detachment. 0.4 µL yTub in beads		1	1	1
2021-03-17	21_0317_040348	2.7975	0.026392	23.159	3.5216	0.16	179.02	0.0347	Bead #29: Pre-loaded with 3 pN. 1 mM Mg2+, Observed dissassembly, detachment. 0.4 µL yTub in beads		1	1	1
2021-03-17	21_0317_040623	2.8764	0.018998	15.845	4.1838	0.77	-175.21	0.0347	Bead #30: Pre-loaded with 3 pN. 1 mM Mg2+, Observed dissassembly, detachment. 0.4 µL yTub in beads		1	1	1
2021-03-17	21_0317_040721	1.8325	0.017702	5.0202	3.1908	0.32	-177.26	0.0347	Bead #31: Pre-loaded with 2 pN. 1 mM Mg2+, Observed dissassembly, detachment. 0.4 µL yTub in beads		1	0	1
2021-03-17	21_0317_040834	1.8886	0.014917	11.707	2.009	0.095	179.62	0.0347	Bead #32: Pre-loaded with 2 pN. 1 mM Mg2+, Observed dissassembly, detachment. 0.4 µL yTub in beads		1	1	1
2021-03-17	21_0317_041047	1.9112	0.027704	16.382	4.1515	0.35	177.49	0.0347	Bead #33: Pre-loaded with 2 pN. 1 mM Mg2+, Observed dissassembly, detachment. 0.4 µL yTub in beads		1	1	1
2021-03-18	21_0318_125055	3.8339	0.018517	12.993	4.8602	0.085	-176.85	0.0347	Bead #1: Pre-loaded with 4 pN. 12 mM Mg2+, Observed dissassembly, detachment. 0.3 µL yTub in beads		12	1	1
2021-03-18	21_0318_125440	3.7791	0.04875	13.849	4.7997	0.16	179.74	0.0347	Bead #2: Pre-loaded with 4 pN. 12 mM Mg2+, Observed dissassembly, detachment. 0.3 µL yTub in beads		12	1	1
2021-03-18	21_0318_125536	3.8726	0.027806	27.599	7.4715	0.295	179.62	0.0347	Bead #3: Pre-loaded with 4 pN. 12 mM Mg2+, Observed dissassembly, detachment. 0.3 µL yTub in beads		12	1	1
2021-03-18	21_0318_125946	3.9029	0.016488	16.447	4.9754	0.245	179.6	0.0347	Bead #4: Pre-loaded with 4 pN. 12 mM Mg2+, Observed dissassembly, detachment. 0.3 µL yTub in beads		12	1	1
2021-03-18	21_0318_010355	3.9058	0.014289	23.798	3.2215	0.13	-178.46	0.0347	Bead #5: Pre-loaded with 4 pN. 12 mM Mg2+, Observed dissassembly, detachment. 0.3 µL yTub in beads		12	1	1
2021-03-18	21_0318_010615	2.8637	0.025267	15.395	7.4239	0.22	-178.49	0.0347	Bead #6: Pre-loaded with 4 pN. 12 mM Mg2+, Observed dissassembly, detachment. 0.3 µL yTub in beads		12	0	1
2021-03-18	21_0318_010657	2.8782	0.026133	28.967	4.1989	0.385	179.33	0.0347	Bead #7: Pre-loaded with 4 pN. 12 mM Mg2+, Observed dissassembly, detachment. 0.3 µL yTub in beads		12	1	1
2021-03-18	21_0318_010830	2.961	0.024431	8.9013	4.175	0.42	-176.68	0.0347	Bead #8: Pre-loaded with 4 pN. 12 mM Mg2+, Observed dissassembly, detachment. 0.3 µL yTub in beads		12	0	1
2021-03-18	21_0318_010942	2.9226	0.025745	16.814	4.832	0.175	-178.95	0.0347	Bead #9: Pre-loaded with 4 pN. 12 mM Mg2+, Observed dissassembly, detachment. 0.3 µL yTub in beads		12	1	1
2021-03-18	21_0318_011542	2.9157	0.045509	19.464	5.9574	0.16	179.52	0.0347	Bead #10: Pre-loaded with 4 pN. 12 mM Mg2+, Observed dissassembly, detachment. 0.3 µL yTub in beads (refrozen yTub post-spin)		12	1	1
2021-03-18	21_0318_011723	2.8712	0.024527	14.559	9.9934	0.105	-175.89	0.0347	Bead #11: Pre-loaded with 4 pN. 12 mM Mg2+, Observed dissassembly, detachment. 0.3 µL yTub in beads (refrozen yTub post-spin)		12	0	1
2021-03-18	21_0318_011836	2.8924	0.031262	4.1474	11.483	0.32	178.88	0.0347	Bead #12: Pre-loaded with 4 pN. 12 mM Mg2+, Observed dissassembly, detachment. 0.3 µL yTub in beads (refrozen yTub post-spin)		12	0	1
2021-03-18	21_0318_012003	2.847	0.090064	24.193	3.0096	0.105	-176.86	0.0347	Bead #13: Pre-loaded with 4 pN. 12 mM Mg2+, Observed dissassembly, detachment. 0.3 µL yTub in beads (refrozen yTub post-spin)		12	1	1
2021-03-18	21_0318_012235	2.8241	0.014177	18.512	3.8004	0.3	176.49	0.0347	Bead #14: Pre-loaded with 4 pN. 12 mM Mg2+, Observed dissassembly, detachment. 0.3 µL yTub in beads (refrozen yTub post-spin)		12	1	1
2021-03-18	21_0318_012603	2.8562	0.022302	13.95	7.9929	0.2	178.65	0.0347	Bead #15: Pre-loaded with 4 pN. 12 mM Mg2+, Observed dissassembly, detachment. 0.3 µL yTub in beads (refrozen yTub post-spin)		12	0	1
2021-03-18	21_0318_012935	2.8897	0.014225	12.679	3.8241	0.26	170.77	0.0347	Bead #16: Pre-loaded with 3 pN. 12 mM Mg2+, Observed dissassembly, detachment. 0.3 µL yTub in beads		12	0	1
2021-03-18	21_0318_013416	2.8436	0.027455	27.637	11.463	0.3	-177.36	0.0347	Bead #17: Pre-loaded with 3 pN. 12 mM Mg2+, Observed dissassembly, detachment. 0.3 µL yTub in beads		12	0	1
2021-03-18	21_0318_013703	2.8858	0.012401	19.373	2.8863	0.535	177.75	0.0347	Bead #18: Pre-loaded with 3 pN. 12 mM Mg2+, Observed dissassembly, detachment. 0.3 µL yTub in beads		12	1	1
2021-03-18	21_0318_013837	3.0705	0.049034	24.882	2.4056	0.135	-1.4898	0.0347	Bead #19: Pre-loaded with 3 pN. 12 mM Mg2+, Observed dissassembly, detachment. 0.3 µL yTub in beads		12	1	1
2021-03-18	21_0318_014049	1.8442	0.020875	32.051	5.4137	0.31	-177.49	0.0347	Bead #20: Pre-loaded with 3 pN. 12 mM Mg2+, Observed dissassembly, detachment. 0.3 µL yTub in beads		12	1	1
2021-03-18	21_0318_015204	1.9075	0.012836	23.702	3.6768	0.38	178.4	0.0347	Bead #21: Pre-loaded with 2 pN. 12 mM Mg2+, Observed dissassembly, detachment. 0.3 µL yTub in beads		12	1	1
2021-03-18	21_0318_015358	1.8239	0.019315	25.778	5.6071	0.18	-175.76	0.0347	Bead #22: Pre-loaded with 2 pN. 12 mM Mg2+, Observed dissassembly, detachment. 0.3 µL yTub in beads		12	1	1
2021-03-18	21_0318_015722	2.906	0.044073	20.487	10.011	0.39	175.28	0.0347	Bead #23: Pre-loaded with 2 pN. 12 mM Mg2+, Observed dissassembly, detachment. 0.3 µL yTub in beads		12	0	1
2021-03-18	21_0318_015818	2.8706	0.01676	9.4711	2.9717	0.165	-179.4	0.0347	Bead #24: Pre-loaded with 2 pN. 12 mM Mg2+, Observed dissassembly, detachment. 0.3 µL yTub in beads		12	0	1
2021-03-18	21_0318_015934	2.8912	0.026729	12.619	4.0306	0.165	-173.76	0.0347	Bead #25: Pre-loaded with 3 pN. 12 mM Mg2+, Observed dissassembly, detachment. 0.3 µL yTub in beads		12	0	1
2021-03-18	21_0318_020259	3.874	0.016904	18.337	4.7419	0.36	-179.65	0.0347	Bead #26: Pre-loaded with 3 pN. 12 mM Mg2+, Observed dissassembly, detachment. 0.3 µL yTub in beads		12	1	1
2021-03-18	21_0318_020505	3.8429	0.017431	23.842	4.8805	0.225	179.67	0.0347	Bead #27: Pre-loaded with 3 pN. 12 mM Mg2+, Observed dissassembly, detachment. 0.3 µL yTub in beads		12	1	1
2021-03-18	21_0318_020755	3.9787	0.022647	11.696	4.1926	0.2	-178.27	0.0347	Bead #28: Pre-loaded with 3 pN. 12 mM Mg2+, Observed dissassembly, detachment. 0.3 µL yTub in beads		12	0	1
2021-03-18	21_0318_021212	3.8291	0.030331	31.855	10.865	0.135	-179.74	0.0347	Bead #29: Pre-loaded with 3 pN. 12 mM Mg2+, Observed dissassembly, detachment. 0.3 µL yTub in beads. (refrozen yTub post-spin)		12	0	1
2021-03-18	21_0318_022425	3.8747	0.020907	15.564	5.4782	0.25	179.94	0.0347	Bead #30: Pre-loaded with 4 pN. 12 mM Mg2+, Observed dissassembly, detachment. 0.3 µL yTub in beads. (refrozen yTub post-spin)		12	0	1
2021-03-18	21_0318_023336	4.0369	0.021845	17.69	4.2304	0.145	-178.23	0.0347	Bead #31: Pre-loaded with 4 pN. 12 mM Mg2+, Observed dissassembly, detachment. 0.3 µL yTub in beads.		12	1	1
2021-03-18	21_0318_023535	3.8304	0.026335	25.134	3.2261	0.22	179.34	0.0347	Bead #32: Pre-loaded with 4 pN. 12 mM Mg2+, Observed dissassembly, detachment. 0.3 µL yTub in beads.		12	1	1
2021-03-18	21_0318_023732	3.9268	0.027327	4.2249	6.6453	0.08	-176.61	0.0347	Bead #33: Pre-loaded with 4 pN. 12 mM Mg2+, Observed dissassembly, detachment. 0.3 µL yTub in beads.		12	0	1
2021-03-18	21_0318_023906	3.914	0.027339	6.0533	5.3833	0.02	179.1	0.0347	Bead #34: Pre-loaded with 4 pN. 12 mM Mg2+, Observed dissassembly, detachment. 0.3 µL yTub in beads.		12	0	1
2021-03-18	21_0318_024042	3.986	0.01724	12.876	3.151	0.16	178.12	0.0347	Bead #35: Pre-loaded with 4 pN. 12 mM Mg2+, Observed dissassembly, detachment. 0.3 µL yTub in beads.		12	1	1
2021-03-18	21_0318_024143	4.0475	0.022137	25.661	5.0982	0.225	-12.269	0.0347	Bead #36: Pre-loaded with 4 pN. 12 mM Mg2+, Observed dissassembly, detachment. 0.3 µL yTub in beads.		12	1	1
2021-03-18	21_0318_024349	3.9356	0.035491	14.087	5.7128	0.09	179.84	0.0347	Bead #38: Pre-loaded with 4 pN. 12 mM Mg2+, Observed dissassembly, detachment. 0.3 µL yTub in beads.		12	0	1
2021-03-18	21_0318_025315	3.917	0.023612	17.009	5.1028	0.14	-178.09	0.0347	Bead #39: Pre-loaded with 4 pN. 12 mM Mg2+, Observed dissassembly, detachment. 0.3 µL yTub in beads.		12	1	1
2021-03-18	21_0318_025542	3.8494	0.036919	17.35	4.9875	0.05	177.12	0.0347	Bead #40: Pre-loaded with 4 pN. 12 mM Mg2+, Observed dissassembly, detachment. 0.3 µL yTub in beads.		12	1	1
2021-03-18	21_0318_025716	3.9112	0.018461	10.457	5.2043	0.14	-176.32	0.0347	Bead #41: Pre-loaded with 4 pN. 12 mM Mg2+, Observed dissassembly, detachment. 0.3 µL yTub in beads.		12	0	1
2021-03-19	21_0319_010511	3.9047	0.043687	8.2953	6.014	0.42	-178	0.0683	Bead #1: Pre-loaded with 4 pN. 12 mM Mg2+, Observed dissassembly, detachment. 0.4 µL yTub in beads (refrozen yTub post-spin)		12	0	1
2021-03-19	21_0319_011430	3.8216	0.023047	19.658	4.5046	0.18	179.34	0.0347	Bead #2: Pre-loaded with 4 pN. 12 mM Mg2+, Observed dissassembly, detachment. 0.4 µL yTub in beads (refrozen yTub post-spin)		12	1	1
2021-03-19	21_0319_013741	3.8117	0.022296	20.549	6.3677	0.54	179.81	0.0347	Bead #3: Pre-loaded with 4 pN. 12 mM Mg2+, Observed dissassembly, detachment. 0.4 µL yTub in beads (refrozen yTub post-spin)		12	0	1
2021-03-19	21_0319_014133	3.8599	0.027632	27.153	7.6587	0.165	-178.6	0.0347	Bead #4: Pre-loaded with 4 pN. 12 mM Mg2+, Observed dissassembly, detachment. 0.4 µL yTub in beads (refrozen yTub post-spin)		12	1	1
2021-03-19	21_0319_014721	3.9149	0.023225	34.955	5.4119	0.16	178.43	0.0347	Bead #5: Pre-loaded with 4 pN. 12 mM Mg2+, Observed dissassembly, detachment. 0.4 µL yTub in beads (refrozen yTub post-spin)		12	1	1
2021-03-19	21_0319_015800	3.8871	0.034297	20.587	6.5419	0.125	-179.47	0.0347	Bead #6: Pre-loaded with 4 pN. 20 mM Mg2+, Observed dissassembly, detachment. 0.4 µL yTub in beads (refrozen yTub post-spin)		12	1	1
2021-03-19	21_0319_022444	3.8701	0.054834	15.894	6.3551	0.06	-177.88	0.0347	Bead #7: Pre-loaded with 4 pN. 12 mM Mg2+, Observed dissassembly, detachment. 0.4 µL yTub in beads (refrozen yTub` post-spin)		12	1	1
2021-03-19	21_0319_022658	3.9193	0.01765	20.456	3.8924	0.24	179.39	0.0347	Bead #8: Pre-loaded with 4 pN. 12 mM Mg2+, Observed dissassembly, detachment. 0.4 µL yTub in beads (refrozen yTub post-spin)		12	1	1
2021-03-19	21_0319_023007	3.9208	0.016752	10.946	4.3598	0.185	-178.94	0.0347	Bead #9: Pre-loaded with 4 pN. 12 mM Mg2+, Observed dissassembly, detachment. 0.4 µL yTub in beads (refrozen yTub post-spin)		12	0	1
2021-03-19	21_0319_024040	3.8164	0.01866	31.224	5.8388	0.265	-179.51	0.0347	Bead #10: Pre-loaded with 4 pN. 12 mM Mg2+, Observed dissassembly, detachment. 0.4 µL yTub in beads (refrozen yTub post-spin)		12	1	1
2021-03-19	21_0319_024623	3.8922	0.023245	16.18	4.005	0.12	-176.96	0.0347	Bead #11: Pre-loaded with 4 pN. 12 mM Mg2+, Observed dissassembly, detachment. 0.4 µL yTub in beads (refrozen yTub post-spin)		12	1	1
2021-03-19	21_0319_025536	2.869	0.014251	5.7742	5.7303	0.33	179.47	0.0347	Bead #12: Pre-loaded with 4 pN. 12 mM Mg2+, Observed dissassembly, detachment. 0.4 µL yTub in beads (refrozen yTub post-spin)		12	0	1
2021-03-20	21_0320_020947	3.8908	0.036589	17.831	6.7663	0.145	-177.01	0.0347	Bead #1: Pre-loaded with 4 pN. 20 mM Mg2+, Observed dissassembly, detachment. 0.3 µL yTub in beads		20	1	1
2021-03-20	21_0320_021318	3.8645	0.030851	15.869	5.387	0.14	-178.36	0.0347	Bead #2: Pre-loaded with 4 pN. 20 mM Mg2+, Observed dissassembly, detachment. 0.3 µL yTub in beads		20	0	1
2021-03-20	21_0320_021700	3.7962	0.20423	12.192	4.6982	0.055	179.59	0.0347	Bead #3: Pre-loaded with 4 pN. 20 mM Mg2+, Observed dissassembly, detachment. 0.3 µL yTub in beads		20	0	1
2021-03-20	21_0320_022228	3.8214	0.020547	21.968	4.7321	0.16	179.3	0.0347	Bead #4: Pre-loaded with 4 pN. 20 mM Mg2+, Observed dissassembly, detachment. 0.3 µL yTub in beads		20	1	1
2021-03-20	21_0320_022400	3.8926	0.020192	7.6734	4.8305	0.205	-174.7	0.0347	Bead #5: Pre-loaded with 4 pN. 20 mM Mg2+, Observed dissassembly, detachment. 0.3 µL yTub in beads		20	0	1
2021-03-20	21_0320_023829	3.8568	0.042664	15.753	9.1681	0.1	-178.04	0.0347	Bead #6: Pre-loaded with 4 pN. 20 mM Mg2+, Observed dissassembly, detachment. 0.3 µL yTub in beads		20	0	1
2021-03-20	21_0320_024041	3.8912	0.016816	32.844	5.3871	0.405	-179.21	0.0347	Bead #7: Pre-loaded with 4 pN. 20 mM Mg2+, Observed dissassembly, detachment. 0.3 µL yTub in beads		20	1	1
2021-03-20	21_0320_024334	3.8874	0.095694	17.606	5.0352	0.12	-179.87	0.0347	Bead #8: Pre-loaded with 4 pN. 20 mM Mg2+, Observed dissassembly, detachment. 0.3 µL yTub in beads		20	1	1
2021-03-20	21_0320_024421	3.8358	0.035255	15.862	8.9774	0.18	178.67	0.0347	Bead #9: Pre-loaded with 4 pN. 20 mM Mg2+, Observed dissassembly, detachment. 0.3 µL yTub in beads		20	0	1
2021-03-20	21_0320_025111	3.8557	0.099688	18.339	5.0527	0.065	-179.77	0.0347	Bead #10: Pre-loaded with 4 pN. 20 mM Mg2+, Observed dissassembly, detachment. 0.3 µL yTub in beads		20	1	1
2021-03-20	21_0320_025320	5.768	0.043397	10.495	4.4184	0.3	-179.39	0.0683	Bead #11: Pre-loaded with 6 pN. 12 mM Mg2+, Observed dissassembly, detachment. 0.3 µL yTub in beads		12	0	1
2021-03-20	21_0320_025908	5.7505	0.031712	5.9553	4.0752	0.19	-178.53	0.0683	Bead #12: Pre-loaded with 6 pN. 12 mM Mg2+, Observed dissassembly, detachment. 0.3 µL yTub in beads		12	0	1
2021-03-20	21_0320_030211	5.9291	0.020711	4.6121	3.2714	0.19	179.68	0.0683	Bead #13: Pre-loaded with 6 pN. 12 mM Mg2+, Observed dissassembly, detachment. 0.3 µL yTub in beads		12	0	1
2021-03-20	21_0320_031851	5.9149	0.02896	4.5885	2.9831	0.24	179.32	0.0683	Bead #14: Pre-loaded with 6 pN. 12 mM Mg2+, Observed dissassembly, detachment. 0.3 µL yTub in beads		12	0	1
2021-03-20	21_0320_034328	5.7099	0.049496	8.6872	5.9478	0.31	-178.99	0.0683	Bead #15: Pre-loaded with 6 pN. 12 mM Mg2+, Observed dissassembly, detachment. 0.3 µL yTub in beads		12	0	1
2021-03-20	21_0320_034451	5.6854	0.042634	12.306	4.0305	0.32	-178.83	0.0683	Bead #17: Pre-loaded with 6 pN. 12 mM Mg2+, Observed dissassembly, detachment. 0.3 µL yTub in beads		12	1	1
2021-03-20	21_0320_035102	6.0123	0.047034	11.473	4.8728	0.165	179.22	0.0683	Bead #18: Pre-loaded with 6 pN. 12 mM Mg2+, Observed dissassembly, detachment. 0.3 µL yTub in beads		12	0	1
2021-03-20	21_0320_040221	3.7055	0.30469	11.625	6.2828	0.005	179.82	0.0683	Bead #19: Pre-loaded with 4 pN. 20 mM Mg2+, Observed dissassembly, detachment. 0.3 µL yTub in beads		20	0	1
2021-04-14	21_0414_105647	2.902	0.02251	15.694	4.7081	0.04	-177.17	0.0347	Bead #1: Pre-loaded with 3 pN. 6 mM Mg2+, Observed dissassembly, detachment. 0.3 µL yTub in beads (refrozen yTub post-spin).		6	1	1
2021-04-14	21_0414_105944	2.9474	0.027124	14.849	6.1418	0.21	-177.76	0.0347	Bead #2: Pre-loaded with 3 pN. 6 mM Mg2+, Observed dissassembly, detachment. 0.3 µL yTub in beads (refrozen yTub post-spin).		6	0	1
2021-04-14	21_0414_110555	2.9604	0.029367	16.97	4.7518	0.145	-5.6349	0.0347	Bead #3: Pre-loaded with 3 pN. 6 mM Mg2+, Observed dissassembly, detachment. 0.3 µL yTub in beads (refrozen yTub post-spin).		6	1	1
2021-04-14	21_0414_110719	2.8033	0.042356	4.7882	11.627	0.1	-179.56	0.0347	Bead #4: Pre-loaded with 3 pN. 6 mM Mg2+, Observed dissassembly, detachment. 0.3 µL yTub in beads (refrozen yTub post-spin).		6	1	1
2021-04-14	21_0414_110931	3.0559	0.012453	19.071	5.5588	0.14	178.55	0.0347	Bead #5: Pre-loaded with 3 pN. 6 mM Mg2+, Observed dissassembly, detachment. 0.3 µL yTub in beads (refrozen yTub post-spin).		6	0	1
2021-04-14	21_0414_111816	3.6896	0.03591	18.986	5.2356	0.145	-176.29	0.0347	Bead #6: Pre-loaded with 4 pN. 20 mM Mg2+, Observed dissassembly, detachment. 0.3 µL yTub in beads (refrozen yTub post-spin).		20	1	1
2021-04-14	21_0414_112038	3.0214	0.020769	13.519	4.5234	0.09	-178.29	0.0347	Bead #7: Pre-loaded with 3 pN. 6 mM Mg2+, Observed dissassembly, detachment. 0.3 µL yTub in beads (refrozen yTub post-spin).		6	1	1
2021-04-14	21_0414_112436	2.8279	0.011184	7.0165	2.583	0.22	-176.49	0.0347	Bead #8: Pre-loaded with 3 pN. 6 mM Mg2+, Observed dissassembly, detachment. 0.3 µL yTub in beads (refrozen yTub post-spin).		6	0	1
2021-04-14	21_0414_112559	2.9246	0.018765	8.7522	3.1567	0.1	-179.3	0.0347	Bead #9: Pre-loaded with 3 pN. 6 mM Mg2+, Observed dissassembly, detachment. 0.3 µL yTub in beads (refrozen yTub post-spin).		6	0	1
2021-04-14	21_0414_112742	2.9549	0.14921	36.057	3.6696	0.08	-179.04	0.0347	Bead #10: Pre-loaded with 3 pN. 6 mM Mg2+, Observed dissassembly, detachment. 0.3 µL yTub in beads (refrozen yTub post-spin).		6	1	1
2021-04-14	21_0414_113657	2.8756	0.016348	14.924	4.163	0.14	175.9	0.0347	Bead #11: Pre-loaded with 3 pN. 6 mM Mg2+, Observed dissassembly, detachment. 0.3 µL yTub in beads (refrozen yTub post-spin).		6	1	1
2021-04-14	21_0414_113851	2.9552	0.032662	15.195	8.1882	0.245	-179.89	0.0347	Bead #12: Pre-loaded with 3 pN. 6 mM Mg2+, Observed dissassembly, detachment. 0.3 µL yTub in beads (refrozen yTub post-spin).		6	0	1
2021-04-14	21_0414_114935	3.0236	0.016161	18.666	2.8587	0.1	-179.07	0.0347	Bead #13: Pre-loaded with 3 pN. 6 mM Mg2+, Observed dissassembly, detachment. 0.3 µL yTub in beads (refrozen yTub post-spin).		6	1	1
2021-04-14	21_0414_115628	2.9077	0.041878	6.3173	4.3355	0.09	179.38	0.0347	Bead #14: Pre-loaded with 3 pN. 6 mM Mg2+, Observed dissassembly, detachment. 0.3 µL yTub in beads (refrozen yTub post-spin).		6	0	1
2021-04-14	21_0414_115958	2.9994	0.025028	6.0798	6.1375	0.315	-175.07	0.0347	Bead #15: Pre-loaded with 3 pN. 6 mM Mg2+, Observed dissassembly, detachment. 0.3 µL yTub in beads (refrozen yTub post-spin).		6	0	1
2021-04-14	21_0414_120137	2.8827	0.023986	17.439	5.4023	0.13	-178.66	0.0347	Bead #16: Pre-loaded with 3 pN. 6 mM Mg2+, Observed dissassembly, detachment. 0.3 µL yTub in beads (refrozen yTub post-spin).		6	1	1
2021-04-14	21_0414_120238	2.9933	0.012093	21.542	5.1729	0.435	177.79	0.0347	Bead #17: Pre-loaded with 3 pN. 6 mM Mg2+, Observed dissassembly, detachment. 0.3 µL yTub in beads (refrozen yTub post-spin).		6	1	1
2021-04-14	21_0414_120717	2.9032	0.021798	32.618	4.3233	0.16	-179.68	0.0347	Bead #18: Pre-loaded with 3 pN. 6 mM Mg2+, Observed dissassembly, detachment. 0.3 µL yTub in beads (refrozen yTub post-spin).		6	1	1
2021-04-14	21_0414_120905	2.9828	0.061644	17.407	7.0474	0.06	179.66	0.0347	Bead #19: Pre-loaded with 3 pN. 6 mM Mg2+, Observed dissassembly, detachment. 0.3 µL yTub in beads (refrozen yTub post-spin).		6	0	1
2021-04-14	21_0414_121359	3.8226	0.016247	8.6698	2.8956	0.08	178.4	0.0347	Bead #20: Pre-loaded with 4 pN. 6 mM Mg2+, Observed dissassembly, detachment. 0.3 µL yTub in beads (refrozen yTub post-spin).		6	0	1
2021-04-14	21_0414_121543	3.9831	0.017068	12.023	4.9778	0.275	-179.83	0.0347	Bead #21: Pre-loaded with 4 pN. 6 mM Mg2+, Observed dissassembly, detachment. 0.3 µL yTub in beads (refrozen yTub post-spin).		6	0	1
2021-04-14	21_0414_121807	3.8555	0.014876	16.039	5.3426	0.165	-177.73	0.0347	Bead #22: Pre-loaded with 4 pN. 6 mM Mg2+, Observed dissassembly, detachment. 0.3 µL yTub in beads (refrozen yTub post-spin).		6	1	1
2021-04-14	21_0414_121950	3.9181	0.043851	24.789	3.3429	0.11	-179.67	0.0347	Bead #23: Pre-loaded with 4 pN. 6 mM Mg2+, Observed dissassembly, detachment. 0.3 µL yTub in beads (refrozen yTub post-spin).		6	1	1
2021-04-14	21_0414_122113	2.7926	0.016051	1.8509	3.8987	0.215	179.15	0.0347	Bead #24: Pre-loaded with 3 pN. 6 mM Mg2+, Observed dissassembly, detachment. 0.3 µL yTub in beads (refrozen yTub post-spin).		6	0	1
2021-04-14	21_0414_122854	3.0693	0.0058797	22	2.2405	0.195	-178.98	0.0347	Bead #25: Pre-loaded with 3 pN. 6 mM Mg2+, Observed dissassembly, detachment. 0.3 µL yTub in beads (refrozen yTub post-spin).		6	1	1
2021-04-14	21_0414_123701	2.9991	0.019448	17.735	2.6689	0.16	179.92	0.0347	Bead #26: Pre-loaded with 3 pN. 6 mM Mg2+, Observed dissassembly, detachment. 0.3 µL yTub in beads (refrozen yTub post-spin).		6	1	1
2021-04-14	21_0414_123858	2.9884	0.010577	13.874	3.5406	0.18	-178.68	0.0347	Bead #27: Pre-loaded with 3 pN. 6 mM Mg2+, Observed dissassembly, detachment. 0.3 µL yTub in beads (refrozen yTub post-spin).		6	1	1
2021-04-14	21_0414_124002	2.8024	0.034345	14.408	12.973	0.14	-178.17	0.0347	Bead #28: Pre-loaded with 3 pN. 6 mM Mg2+, Observed dissassembly, detachment. 0.3 µL yTub in beads (refrozen yTub post-spin).		6	0	1
2021-04-14	21_0414_124407	2.8397	0.030673	-3.1735	13.333	0.085	-177.35	0.0347	Bead #29: Pre-loaded with 3 pN. 6 mM Mg2+, Observed dissassembly, detachment. 0.3 µL yTub in beads (refrozen yTub post-spin).		6	0	1
2021-04-14	21_0414_124641	2.8603	0.026737	11.07	5.6848	0.22	-174.07	0.0347	Bead #30: Pre-loaded with 3 pN. 6 mM Mg2+, Observed dissassembly, detachment. 0.3 µL yTub in beads (refrozen yTub post-spin).		6	0	1
2021-04-14	21_0414_124744	2.9965	0.019211	10.87	5.0792	0.135	-176.61	0.0347	Bead #31: Pre-loaded with 3 pN. 6 mM Mg2+, Observed dissassembly, detachment. 0.3 µL yTub in beads (refrozen yTub post-spin).		6	0	1
2021-04-14	21_0414_125403	2.8186	0.027217	13.158	6.8215	0.115	-179.05	0.0347	Bead #32: Pre-loaded with 3 pN. 6 mM Mg2+, Observed dissassembly, detachment. 0.3 µL yTub in beads (refrozen yTub post-spin).		6	0	1
2021-04-20	21_0420_014312	3.8342	0.026189	24.344	5.5725	0.2	178.12	0.0347	Bead #1: Pre-loaded with 4 pN. 20 mM Mg2+, Observed dissassembly, detachment. 0.3 µL yTub in beads (refrozen yTub post-spin).		20	1	1
2021-04-20	21_0420_015716	3.752	0.014715	21.817	4.0994	0.16	-178.25	0.0347	Bead #2: Pre-loaded with 4 pN. 20 mM Mg2+, Observed dissassembly, detachment. 0.3 µL yTub in beads (refrozen yTub post-spin).		20	1	1
2021-04-20	21_0420_020516	3.8623	0.093839	23.428	5.4601	0.1	179.48	0.0347	Bead #3: Pre-loaded with 4 pN. 20 mM Mg2+, Observed dissassembly, detachment. 0.3 µL yTub in beads (refrozen yTub post-spin).		20	1	1
2021-04-20	21_0420_021709	3.8766	0.02321	14.817	4.4023	0.16	178.9	0.0347	Bead #4: Pre-loaded with 4 pN. 6 mM Mg2+, Observed dissassembly, detachment. 0.3 µL yTub in beads (refrozen yTub post-spin).		6	1	1
2021-04-20	21_0420_021824	3.9148	0.011468	2.9674	2.8977	0.18	-179.65	0.0347	Bead #5: Pre-loaded with 4 pN. 6 mM Mg2+, Observed dissassembly, detachment. 0.3 µL yTub in beads (refrozen yTub post-spin).		6	0	1
2021-04-20	21_0420_022210	3.8682	0.016349	19.156	4.6997	0.205	177.7	0.0347	Bead #6: Pre-loaded with 4 pN. 6 mM Mg2+, Observed dissassembly, detachment. 0.3 µL yTub in beads (refrozen yTub post-spin).		6	1	1
2021-04-20	21_0420_022338	3.8855	0.027938	4.1413	5.7707	0.14	-178.29	0.0347	Bead #7: Pre-loaded with 4 pN. 6 mM Mg2+, Observed dissassembly, detachment. 0.3 µL yTub in beads (refrozen yTub post-spin).		6	0	1
2021-04-20	21_0420_022508	3.857	0.01595	11.229	3.0044	0.14	-179.31	0.0347	Bead #8: Pre-loaded with 4 pN. 6 mM Mg2+, Observed dissassembly, detachment. 0.3 µL yTub in beads (refrozen yTub post-spin).		6	1	1
2021-04-20	21_0420_023121	3.8487	0.014303	20.325	4.2758	0.185	179.36	0.0347	Bead #89: Pre-loaded with 4 pN. 6 mM Mg2+, Observed dissassembly, detachment. 0.3 µL yTub in beads (refrozen yTub post-spin).		6	1	1
2021-04-20	21_0420_023339	3.8924	0.025597	13.595	2.8258	0.25	-177.76	0.0347	Bead #10: Pre-loaded with 4 pN. 6 mM Mg2+, Observed dissassembly, detachment. 0.3 µL yTub in beads (refrozen yTub post-spin).		6	1	1
2021-04-20	21_0420_023545	3.8401	0.023437	19.708	4.5641	0.34	-179.94	0.0347	Bead #11: Pre-loaded with 4 pN. 6 mM Mg2+, Observed dissassembly, detachment. 0.3 µL yTub in beads (refrozen yTub post-spin).		6	1	1
2021-04-20	21_0420_025649	3.8345	0.021985	26.203	4.1524	0.2	176.35	0.0347	Bead #12: Pre-loaded with 4 pN. 6 mM Mg2+, Observed dissassembly, detachment. 0.3 µL yTub in beads (refrozen yTub post-spin).		6	1	1
2021-04-20	21_0420_030102	3.9138	0.037329	25.456	4.9748	0.165	-179.39	0.0347	Bead #13: Pre-loaded with 4 pN. 20 mM Mg2+, Observed dissassembly, detachment. 0.3 µL yTub in beads (refrozen yTub post-spin).		20	1	1
2021-04-20	21_0420_030440	3.8666	0.020896	21.741	3.4969	0.185	-178.98	0.0347	Bead #14: Pre-loaded with 4 pN. 20 mM Mg2+, Observed dissassembly, detachment. 0.3 µL yTub in beads (refrozen yTub post-spin).		20	1	1
2021-04-20	21_0420_030846	3.9327	0.017603	19.914	3.459	0.32	-179.37	0.0347	Bead #15: Pre-loaded with 4 pN. 20 mM Mg2+, Observed dissassembly, detachment. 0.3 µL yTub in beads (refrozen yTub post-spin).		20	1	1
2021-04-20	21_0420_032109	3.8589	0.046439	20.355	9.0608	0.06	179.25	0.0347	Bead #16: Pre-loaded with 4 pN. 20 mM Mg2+, Observed dissassembly, detachment. 0.3 µL yTub in beads (refrozen yTub post-spin).		20	0	1
2021-04-20	21_0420_032824	3.9222	0.017017	8.9543	2.8212	0.175	-179.66	0.0347	Bead #17: Pre-loaded with 4 pN. 6 mM Mg2+, Observed dissassembly, detachment. 0.3 µL yTub in beads (refrozen yTub post-spin).		6	1	1
2021-04-20	21_0420_033150	3.8115	0.021937	15.176	4.1824	0.18	-179.48	0.0347	Bead #18: Pre-loaded with 4 pN. 6 mM Mg2+, Observed dissassembly, detachment. 0.3 µL yTub in beads (refrozen yTub post-spin).		6	1	1
2021-04-21	21_0421_022640	2.9528	0.040034	12.534	6.0776	0.125	-174.93	0.0347	Bead #1: Pre-loaded with 3 pN. 6 mM Mg2+, Observed dissassembly, detachment. 0.3 µL yTub in beads (refrozen yTub post-spin).		6	1	1
2021-04-21	21_0421_022907	3.0439	0.074447	12.464	4.8326	0.105	0.2731	0.0347	Bead #2: Pre-loaded with 3 pN. 6 mM Mg2+, Observed dissassembly, detachment. 0.3 µL yTub in beads (refrozen yTub post-spin).		6	1	1
2021-04-21	21_0421_023046	2.9149	0.041551	21.426	5.4725	0.11	-179.26	0.0347	Bead #3: Pre-loaded with 3 pN. 6 mM Mg2+, Observed dissassembly, detachment. 0.3 µL yTub in beads (refrozen yTub post-spin).		6	1	1
2021-04-21	21_0421_023153	2.9834	0.028168	14.662	7.9558	0.16	178.43	0.0347	Bead #4: Pre-loaded with 3 pN. 6 mM Mg2+, Observed dissassembly, detachment. 0.3 µL yTub in beads (refrozen yTub post-spin).		6	0	1
2021-04-21	21_0421_023254	2.8655	0.014886	15.224	2.8622	0.22	-178.39	0.0347	Bead #5: Pre-loaded with 3 pN. 6 mM Mg2+, Observed dissassembly, detachment. 0.3 µL yTub in beads (refrozen yTub post-spin).		6	1	1
2021-04-21	21_0421_023420	2.8987	0.029578	9.8622	7.7091	0.145	-176.9	0.0347	Bead #6: Pre-loaded with 3 pN. 6 mM Mg2+, Observed dissassembly, detachment. 0.3 µL yTub in beads (refrozen yTub post-spin).		6	0	1
2021-04-21	21_0421_023527	2.9421	0.018005	26.97	4.6527	0.28	-178.68	0.0347	Bead #7: Pre-loaded with 3 pN. 6 mM Mg2+, Observed dissassembly, detachment. 0.3 µL yTub in beads (refrozen yTub post-spin).		6	1	1
2021-04-21	21_0421_023651	2.8284	0.035009	18.125	4.7769	0.165	-170.26	0.0347	Bead #8: Pre-loaded with 3 pN. 6 mM Mg2+, Observed dissassembly, detachment. 0.3 µL yTub in beads (refrozen yTub post-spin).		6	1	1
2021-04-21	21_0421_024049	2.8026	0.039455	17.921	4.1333	0.07	179.69	0.0347	Bead #9: Pre-loaded with 3 pN. 6 mM Mg2+, Observed dissassembly, detachment. 0.3 µL yTub in beads (refrozen yTub post-spin).		6	1	1
2021-04-21	21_0421_024133	2.8276	0.067748	11.749	10.765	0.02	-179.48	0.0347	Bead #10: Pre-loaded with 3 pN. 6 mM Mg2+, Observed dissassembly, detachment. 0.3 µL yTub in beads (refrozen yTub post-spin).		6	0	1
2021-04-21	21_0421_024459	3.0381	0.019273	12.912	2.0217	0.12	-4.6799	0.0347	Bead #11: Pre-loaded with 3 pN. 6 mM Mg2+, Observed dissassembly, detachment. 0.3 µL yTub in beads (refrozen yTub post-spin).		6	1	1
2021-04-21	21_0421_024706	2.9747	0.015271	24.847	2.0145	0.16	179.25	0.0347	Bead #12: Pre-loaded with 3 pN. 6 mM Mg2+, Observed dissassembly, detachment. 0.3 µL yTub in beads (refrozen yTub post-spin).		6	0	1
2021-04-21	21_0421_024828	2.9306	0.030316	14.155	6.565	0.185	-177.77	0.0347	Bead #13: Pre-loaded with 3 pN. 6 mM Mg2+, Observed dissassembly, detachment. 0.3 µL yTub in beads (refrozen yTub post-spin).		6	0	1
2021-04-21	21_0421_024919	2.9639	0.02107	14.851	3.5163	0.18	-179.27	0.0347	Bead #14: Pre-loaded with 3 pN. 6 mM Mg2+, Observed dissassembly, detachment. 0.3 µL yTub in beads (refrozen yTub post-spin).		6	1	1
2021-04-21	21_0421_025151	2.9022	0.02997	4.1786	6.3748	0.105	-176.64	0.0347	Bead #15: Pre-loaded with 3 pN. 6 mM Mg2+, Observed dissassembly, detachment. 0.3 µL yTub in beads (refrozen yTub post-spin).		6	0	1
2021-04-21	21_0421_025307	2.957	0.012601	6.3407	2.6053	0.14	175.39	0.0347	Bead #15: Pre-loaded with 3 pN. 6 mM Mg2+, Observed dissassembly, detachment. 0.3 µL yTub in beads (refrozen yTub post-spin).		6	0	1
2021-04-21	21_0421_025345	2.9509	0.022566	17.948	3.9854	0.1	179.07	0.0347	Bead #16: Pre-loaded with 3 pN. 6 mM Mg2+, Observed dissassembly, detachment. 0.3 µL yTub in beads (refrozen yTub post-spin).		6	1	1
2021-04-21	21_0421_032040	5.7414	0.032334	3.8259	4.2808	0.265	-178.8	0.0683	Bead #17: Pre-loaded with 6 pN. 12 mM Mg2+, Observed dissassembly, detachment. 0.3 µL yTub in beads (refrozen yTub post-spin).		12	0	1
2021-04-21	21_0421_032405	5.6213	0.048254	17.023	7.1698	0.16	-177.73	0.0683	Bead #18: Pre-loaded with 6 pN. 12 mM Mg2+, Observed dissassembly, detachment. 0.3 µL yTub in beads (refrozen yTub post-spin).		12	0	1
2021-04-21	21_0421_032522	5.9304	0.046377	10.277	8.0614	0.18	-178.88	0.0683	Bead #19: Pre-loaded with 6 pN. 12 mM Mg2+, Observed dissassembly, detachment. 0.3 µL yTub in beads (refrozen yTub post-spin).		12	0	1
2021-04-21	21_0421_032745	5.734	0.012677	9.1118	2.8998	0.3	-179.38	0.0683	Bead #20: Pre-loaded with 6 pN. 12 mM Mg2+, Observed dissassembly, detachment. 0.3 µL yTub in beads (refrozen yTub post-spin).		12	1	1
2021-04-21	21_0421_032857	5.8709	0.016664	7.2717	2.9583	0.14	-177.62	0.0683	Bead #21: Pre-loaded with 6 pN. 12 mM Mg2+, Observed dissassembly, detachment. 0.3 µL yTub in beads (refrozen yTub post-spin).		12	0	1
2021-04-21	21_0421_033015	5.8427	0.032476	14.878	5.4535	0.15	-177.88	0.0683	Bead #22: Pre-loaded with 6 pN. 12 mM Mg2+, Observed dissassembly, detachment. 0.3 µL yTub in beads (refrozen yTub post-spin).		12	0	1
2021-04-21	21_0421_033123	3.8234	0.02006	9.9093	3.4099	0.38	-176.12	0.0683	Bead #23: Pre-loaded with 4 pN. 12 mM Mg2+, Observed dissassembly, detachment. 0.3 µL yTub in beads (refrozen yTub post-spin).		12	1	1
2021-04-21	21_0421_033228	3.8443	0.13019	22.739	3.9333	0.06	-178.58	0.0683	Bead #24: Pre-loaded with 4 pN. 12 mM Mg2+, Observed dissassembly, detachment. 0.3 µL yTub in beads (refrozen yTub post-spin).		12	1	1
2021-04-21	21_0421_033450	5.7226	0.041424	17.159	3.6634	0.385	177.74	0.0683	Bead #25: Pre-loaded with 4 pN. 12 mM Mg2+, Observed dissassembly, detachment. 0.3 µL yTub in beads (refrozen yTub post-spin).		12	1	1
2021-04-21	21_0421_033751	5.7864	0.041265	10.734	3.6441	0.245	-178.98	0.0683	Bead #25: Pre-loaded with 6 pN. 12 mM Mg2+, Observed dissassembly, detachment. 0.3 µL yTub in beads (refrozen yTub post-spin).		12	0	1
2021-04-21	21_0421_033933	5.7593	0.018927	12.437	3.76	0.29	-178.99	0.0683	Bead #26: Pre-loaded with 6 pN. 12 mM Mg2+, Observed dissassembly, detachment. 0.3 µL yTub in beads (refrozen yTub post-spin).		12	1	1
2021-04-21	21_0421_034024	5.7971	0.023951	7.4621	3.6102	0.29	178.8	0.0683	Bead #27: Pre-loaded with 6 pN. 12 mM Mg2+, Observed dissassembly, detachment. 0.3 µL yTub in beads (refrozen yTub post-spin).		12	0	1
2021-04-21	21_0421_034306	5.7879	0.038032	12.247	2.848	0.165	-179.54	0.0683	Bead #28: Pre-loaded with 6 pN. 12 mM Mg2+, Observed dissassembly, detachment. 0.3 µL yTub in beads (refrozen yTub post-spin).		12	1	1
2021-04-21	21_0421_034420	5.6692	0.024378	16.035	2.5337	0.125	-178.17	0.0683	Bead #29: Pre-loaded with 6 pN. 12 mM Mg2+, Observed dissassembly, detachment. 0.3 µL yTub in beads (refrozen yTub post-spin).		12	1	1
2021-04-21	21_0421_040107	2.9968	0.017411	16.06	3.3681	0.12	-179.8	0.0347	Bead #30: Pre-loaded with 3 pN. 6 mM Mg2+, Observed dissassembly, detachment. 0.3 µL yTub in beads (refrozen yTub post-spin).		6	1	1
2021-04-21	21_0421_040344	2.9285	0.018562	4.7328	3.2835	0.08	-179.4	0.0347	Bead #31: Pre-loaded with 3 pN. 6 mM Mg2+, Observed dissassembly, detachment. 0.3 µL yTub in beads (refrozen yTub post-spin).		6	0	1
2021-04-21	21_0421_040517	2.9369	0.015673	15.176	3.1164	0.225	178.72	0.0347	Bead #32: Pre-loaded with 3 pN. 6 mM Mg2+, Observed dissassembly, detachment. 0.3 µL yTub in beads (refrozen yTub post-spin).		6	1	1
2021-04-21	21_0421_040822	2.9834	0.014386	20.868	2.1121	0.16	-179.95	0.0347	Bead #33: Pre-loaded with 3 pN. 6 mM Mg2+, Observed dissassembly, detachment. 0.3 µL yTub in beads (refrozen yTub post-spin).		6	1	1
2021-04-21	21_0421_040853	2.8779	0.11506	8.3037	3.3592	0.04	-178.64	0.0347	Bead #34: Pre-loaded with 3 pN. 6 mM Mg2+, Observed dissassembly, detachment. 0.3 µL yTub in beads (refrozen yTub post-spin).		6	0	1
2021-04-21	21_0421_041007	2.92	0.012176	12.033	3.3537	0.245	-177.97	0.0347	Bead #35: Pre-loaded with 3 pN. 6 mM Mg2+, Observed dissassembly, detachment. 0.3 µL yTub in beads (refrozen yTub post-spin).		6	1	1
2021-04-21	21_0421_041135	2.788	0.014595	6.5735	3.9432	0.125	179.28	0.0347	Bead #36: Pre-loaded with 3 pN. 6 mM Mg2+, Observed dissassembly, detachment. 0.3 µL yTub in beads (refrozen yTub post-spin).		6	0	1
2021-04-21	21_0421_041414	2.8388	0.01124	16.765	2.6885	0.42	-179.33	0.0347	Bead #37: Pre-loaded with 3 pN. 6 mM Mg2+, Observed dissassembly, detachment. 0.3 µL yTub in beads (refrozen yTub post-spin).		6	1	1
2021-04-21	21_0421_041716	2.9025	0.041158	12.628	3.5985	0.08	179.92	0.0347	Bead #38: Pre-loaded with 3 pN. 6 mM Mg2+, Observed dissassembly, detachment. 0.3 µL yTub in beads (refrozen yTub post-spin).		6	1	1
2021-04-21	21_0421_042413	2.9556	0.01354	16.303	4.4119	0.14	-178.65	0.0347	Bead #39: Pre-loaded with 3 pN. 6 mM Mg2+, Observed dissassembly, detachment. 0.3 µL yTub in beads (refrozen yTub post-spin).		6	1	1
2021-04-21	21_0421_042603	2.9446	0.022429	13.541	7.3861	0.16	-177.81	0.0347	Bead #40: Pre-loaded with 3 pN. 6 mM Mg2+, Observed dissassembly, detachment. 0.3 µL yTub in beads (refrozen yTub post-spin).		6	0	1
2021-04-21	21_0421_042813	5.7749	0.017247	5.5148	2.4891	0.145	-176.85	0.0683	Bead #41: Pre-loaded with 6 pN. 12 mM Mg2+, Observed dissassembly, detachment. 0.3 µL yTub in beads (refrozen yTub post-spin).		12	0	1
2021-04-21	21_0421_043304	5.6977	0.025495	15.002	3.0644	0.32	-178.56	0.0683	Bead #42: Pre-loaded with 6 pN. 12 mM Mg2+, Observed dissassembly, detachment. 0.3 µL yTub in beads (refrozen yTub post-spin).		12	1	1
2021-04-21	21_0421_043652	5.7751	0.019064	9.9659	2.0564	0.265	-178.32	0.0683	Bead #43: Pre-loaded with 6 pN. 12 mM Mg2+, Observed dissassembly, detachment. 0.3 µL yTub in beads (refrozen yTub post-spin).		12	1	1
2021-04-21	21_0421_043828	5.605	0.044004	9.633	2.9547	0.18	-176.13	0.0683	Bead #44: Pre-loaded with 6 pN. 12 mM Mg2+, Observed dissassembly, detachment. 0.3 µL yTub in beads (refrozen yTub post-spin).		12	1	1
2021-04-21	21_0421_044146	3.8819	0.069741	18.321	2.7858	0.095	-178.49	0.0683	Bead #45: Pre-loaded with 6 pN. 12 mM Mg2+, Observed dissassembly, detachment. 0.3 µL yTub in beads (refrozen yTub post-spin).		12	0	1
2021-04-21	21_0421_044549	3.7005	0.027519	-2.8748	11.784	0.15	-177.98	0.0683	Bead #46: Pre-loaded with 6 pN. 12 mM Mg2+, Observed dissassembly, detachment. 0.3 µL yTub in beads (refrozen yTub post-spin).		12	0	1
2022-06-30	22_0630_034215	4.847	0.066848	6.1978	5.7724	0.3	178.94	0.0683	Bead #1: Pre-loaded with 5 pN. 1 mM Mg2+, Observed dissassembly, detachment. 0.3 µL yTub in beads (refrozen yTub post-spin).		1	0	1
2022-06-30	22_0630_034651	4.7746	0.04842	7.318	2.8602	0.055	175.94	0.0683	Bead #2: Pre-loaded with 5 pN. 1 mM Mg2+, Observed dissassembly, detachment. 0.3 µL yTub in beads (refrozen yTub post-spin).		1	0	1
2022-06-30	22_0630_035344	4.7313	0.026543	8.2247	3.0272	0.04	177.17	0.0683	Bead #3: Pre-loaded with 5 pN. 1 mM Mg2+, Observed dissassembly, detachment. 0.3 µL yTub in beads (refrozen yTub post-spin). 22 µM bTub		1	0	1
2022-06-30	22_0630_035552	4.7863	0.0512	6.4868	1.7531	0.345	178.49	0.0683	Bead #4: Pre-loaded with 5 pN. 1 mM Mg2+, Observed dissassembly, detachment. 0.3 µL yTub in beads (refrozen yTub post-spin). 22 µM bTub		1	1	1
2022-06-30	22_0630_035958	4.7064	0.04303	9.0852	3.2866	0.125	179.18	0.0683	Bead #5: Pre-loaded with 5 pN. 1 mM Mg2+, Observed dissassembly, detachment. 0.3 µL yTub in beads (refrozen yTub post-spin). 22 µM bTub		1	1	1
2022-06-30	22_0630_040101	4.6999	0.034651	6.6977	3.3138	0.065	179.94	0.0683	Bead #6: Pre-loaded with 5 pN. 1 mM Mg2+, Observed dissassembly, detachment. 0.3 µL yTub in beads (refrozen yTub post-spin). 22 µM bTub		1	0	1
2022-06-30	22_0630_040405	4.5842	0.052805	30.165	9.7687	1.225	177.37	0.0683	Bead #7: Pre-loaded with 5 pN. 1 mM Mg2+, Observed dissassembly, detachment. 0.3 µL yTub in beads (refrozen yTub post-spin). 22 µM bTub		1	0	1
2022-06-30	22_0630_040701	4.7523	0.053144	14.139	9.2989	0.36	169.98	0.0683	Bead #8: Pre-loaded with 5 pN. 1 mM Mg2+, Observed dissassembly, detachment. 0.3 µL yTub in beads (refrozen yTub post-spin). 22 µM bTub		1	0	1
2022-06-30	22_0630_040922	4.621	0.035851	19.402	4.9907	0.275	176.96	0.0683	Bead #9: Pre-loaded with 5 pN. 1 mM Mg2+, Observed dissassembly, detachment. 0.3 µL yTub in beads (refrozen yTubpost-spin). 22 µM bTub		1	1	1
2022-06-30	22_0630_041213	5.397	0.026943	3.3757	1.2457	0.08	0.053671	0.0683	Bead #10: Pre-loaded with 5 pN. 1 mM Mg2+, Observed dissassembly, detachment. 0.3 µL yTub in beads (refrozen yTub post-spin). 22 µM bTub		1	1	1
2022-06-30	22_0630_041654	4.6849	0.023368	6.4873	1.4548	0.045	177.67	0.0683	Bead #11: Pre-loaded with 5 pN. 1 mM Mg2+, Observed dissassembly, detachment. 0.3 µL yTub in beads (refrozen yTub post-spin). 22 µM bTub		1	1	1
2022-06-30	22_0630_043711	4.6864	0.022683	3.0612	2.5771	0.2	-178.51	0.0683	Bead #14: Pre-loaded with 5 pN. 1 mM Mg2+, Observed dissassembly, detachment. 0.3 µL yTub in beads (refrozen yTub post-spin). 22 µM bTub.		1	0	1
2022-06-30	22_0630_044039	5.2725	0.08482	7.9704	2.9415	0.095	4.3542	0.0683	Bead #15: Pre-loaded with 5 pN. 1 mM Mg2+, Observed dissassembly, detachment. 0.3 µL yTub in beads (refrozen yTub post-spin). 22 µM bTub.		1	1	1
2022-01-05	22_0705_074454	4.7607	0.033927	5.6158	7.2671	0.185	175.29	0.0683	Bead #3: Pre-loaded with 5 pN. 1 mM Mg2+, Observed dissassembly, detachment. 0.3 µL yTub in beads (refrozen yTub post-spin). 20µM bTub, 1/50 seeds		1	0	1
2022-01-05	22_0705_074628	4.4956	0.02302	3.4629	1.5802	0.085	174.53	0.0683	Bead #4: Pre-loaded with 5 pN. 1 mM Mg2+, Observed dissassembly, detachment. 0.3 µL yTub in beads (refrozen yTub post-spin). 20µM bTub, 1/50 seeds		1	0	1
2022-01-05	22_0705_074742	4.7284	0.046284	16.002	5.5168	0.655	177.77	0.0683	Bead #5: Pre-loaded with 5 pN. 1 mM Mg2+, Observed dissassembly, detachment. 0.3 µL yTub in beads (refrozen yTub post-spin). 20µM bTub, 1/50 seeds		1	0	1
2022-01-05	22_0705_074847	4.6401	0.032975	7.3543	3.673	0.125	-179.51	0.0683	Bead #6: Pre-loaded with 5 pN. 1 mM Mg2+, Observed dissassembly, detachment. 0.3 µL yTub in beads (refrozen yTub post-spin). 20µM bTub, 1/50 seeds		1	0	1
2022-01-05	22_0705_075042	4.7071	0.03249	9.8085	2.9343	0.34	175.25	0.0683	Bead #7: Pre-loaded with 5 pN. 1 mM Mg2+, Observed dissassembly, detachment. 0.3 µL yTub in beads (refrozen yTub post-spin). 20µM bTub, 1/50 seeds		1	0	1
2022-01-05	22_0705_075119	4.9107	0.043571	9.1181	6.1469	0.3	178.72	0.0683	Bead #8: Pre-loaded with 5 pN. 1 mM Mg2+, Observed dissassembly, detachment. 0.3 µL yTub in beads (refrozen yTub post-spin). 20µM bTub, 1/50 seeds		1	0	1
2022-01-05	22_0705_075237	5.327	0.044904	9.5996	2.2617	0.045	-0.10227	0.0683	Bead #9: Pre-loaded with 5 pN. 1 mM Mg2+, Observed dissassembly, detachment. 0.3 µL yTub in beads (refrozen yTub post-spin). 20µM bTub, 1/50 seeds		1	1	1
2022-01-05	22_0705_075530	5.076	0.018474	6.3116	1.7898	0.045	-2.0989	0.0683	Bead #10: Pre-loaded with 5 pN. 1 mM Mg2+, Observed dissassembly, detachment. 0.3 µL yTub in beads (refrozen yTub post-spin). 20µM bTub, 1/50 seeds		1	1	1
2022-01-05	22_0705_075821	4.6323	0.036932	11.55	5.7073	0.09	174.07	0.0683	Bead #11: Pre-loaded with 5 pN. 1 mM Mg2+, Observed dissassembly, detachment. 0.3 µL yTub in beads (refrozen yTub post-spin). 20µM bTub, 1/50 seeds		1	0	1
2022-01-05	22_0705_075913	4.7785	0.032374	2.6747	2.0392	0.02	173.26	0.0683	Bead #12: Pre-loaded with 5 pN. 1 mM Mg2+, Observed dissassembly, detachment. 0.3 µL yTub in beads (refrozen yTub post-spin). 20µM bTub, 1/50 seeds		1	0	1
2022-01-05	22_0705_080040	4.6431	0.024027	12.159	3.0719	0.095	-179.75	0.0683	Bead #13: Pre-loaded with 5 pN. 1 mM Mg2+, Observed dissassembly, detachment. 0.3 µL yTub in beads (refrozen yTub post-spin). 20µM bTub, 1/50 seeds		1	1	1
2022-01-05	22_0705_080202	4.5874	0.03074	8.2283	3.3515	0.1	177.05	0.0683	Bead #14: Pre-loaded with 5 pN. 1 mM Mg2+, Observed dissassembly, detachment. 0.3 µL yTub in beads (refrozen yTub post-spin). 20µM bTub, 1/50 seeds		1	0	1
2022-01-05	22_0705_080323	5.3529	0.021057	7.3947	1.7807	0.145	-0.61221	0.0683	Bead #15: Pre-loaded with 5 pN. 1 mM Mg2+, Observed dissassembly, detachment. 0.3 µL yTub in beads (refrozen yTub post-spin). 20µM bTub, 1/50 seeds		1	1	1
2022-01-05	22_0705_080644	4.6772	0.026651	5.5333	1.5618	0.14	178.95	0.0683	Bead #17: Pre-loaded with 5 pN. 1 mM Mg2+, Observed dissassembly, detachment. 0.3 µL yTub in beads (refrozen yTub post-spin). 20µM bTub, 1/50 seeds		1	1	1
2022-01-05	22_0705_080833	4.7581	0.012183	5.5368	1.4424	0.22	178.66	0.0683	Bead #18: Pre-loaded with 5 pN. 1 mM Mg2+, Observed dissassembly, detachment. 0.3 µL yTub in beads (refrozen yTub post-spin). 20µM bTub, 1/50 seeds		1	1	1
2022-01-05	22_0705_080913	5.1438	0.01686	10.6	2.7673	0.085	-1.9453	0.0683	Bead #19: Pre-loaded with 5 pN. 1 mM Mg2+, Observed dissassembly, detachment. 0.3 µL yTub in beads (refrozen yTub post-spin). 20µM bTub, 1/50 seeds		1	1	1
2022-01-05	22_0705_080952	5.1923	0.15537	8.7019	1.5638	0.04	-11.497	0.0683	Bead #20: Pre-loaded with 5 pN. 1 mM Mg2+, Observed dissassembly, detachment. 0.3 µL yTub in beads (refrozen yTub post-spin). 20µM bTub, 1/50 seeds		1	1	1
2022-01-05	22_0705_081312	1.1228	0.036058	12.881	4.5281	0.065	5.0452	0.0347	Bead #21: Pre-loaded with 1 pN. 1 mM Mg2+, Observed dissassembly, detachment. 0.3 µL yTub in beads (refrozen yTub post-spin). 20µM bTub, 1/50 seeds		1	1	1
2022-01-05	22_0705_081534	0.7775	0.038688	28.832	21.58	0.345	-168.7	0.0347	Bead #22: Pre-loaded with 1 pN. 1 mM Mg2+, Observed dissassembly, detachment. 0.3 µL yTub in beads (refrozen yTub post-spin). 20µM bTub, 1/50 seeds		1	0	1
2022-01-05	22_0705_081750	0.80741	0.015975	18.336	3.3891	0.32	173.12	0.0347	Bead #23: Pre-loaded with 1 pN. 1 mM Mg2+, Observed dissassembly, detachment. 0.3 µL yTub in beads (refrozen yTub post-spin). 20µM bTub, 1/50 seeds		1	1	1
2022-01-05	22_0705_081914	0.73593	0.024466	21.272	3.528	0.12	-165.05	0.0347	Bead #24: Pre-loaded with 1 pN. 1 mM Mg2+, Observed dissassembly, detachment. 0.3 µL yTub in beads (refrozen yTub post-spin). 20µM bTub, 1/50 seeds		1	1	1
2022-01-05	22_0705_082036	0.64142	0.020987	28.433	3.7563	0.095	178.11	0.0347	Bead #25: Pre-loaded with 1 pN. 1 mM Mg2+, Observed dissassembly, detachment. 0.3 µL yTub in beads (refrozen yTub post-spin). 20µM bTub, 1/50 seeds		1	0	1
2022-01-05	22_0705_082421	1.2346	0.033672	12.678	3.6563	0.055	-12.578	0.0347	Bead #26: Pre-loaded with 1 pN. 1 mM Mg2+, Observed dissassembly, detachment. 0.3 µL yTub in beads (refrozen yTub post-spin). 20µM bTub, 1/50 seeds		1	1	1
2022-01-05	22_0705_082459	1.1167	0.056684	20.221	2.2982	0.04	-1.2799	0.0347	Bead #27: Pre-loaded with 1 pN. 1 mM Mg2+, Observed dissassembly, detachment. 0.3 µL yTub in beads (refrozen yTub post-spin). 20µM bTub, 1/50 seeds		1	1	1
2022-01-05	22_0705_082834	0.69947	0.04509	15.888	6.2283	0.025	174.71	0.0347	Bead #28: Pre-loaded with 1 pN. 1 mM Mg2+, Observed dissassembly, detachment. 0.3 µL yTub in beads (refrozen yTub post-spin). 20µM bTub, 1/50 seeds		1	0	1
2022-01-05	22_0705_083141	0.7912	0.01507	20.56	3.8004	0.27	-175.48	0.0347	Bead #29: Pre-loaded with 1 pN. 1 mM Mg2+, Observed dissassembly, detachment. 0.3 µL yTub in beads (refrozen yTub post-spin). 20µM bTub, 1/50 seeds		1	1	1
2022-01-05	22_0705_083856	1.1363	0.023467	31.138	7.0353	0.22	-10.933	0.0347	Bead #31: Pre-loaded with 1 pN. 1 mM Mg2+, Observed dissassembly, detachment. 0.3 µL yTub in beads (refrozen yTub post-spin). 20µM bTub, 1/50 seeds		1	1	1
2022-01-11	22_0711_065906	0.80657	0.023047	6.373	7.4599	0.56	-177.1	0.0347	Bead #1: Pre-loaded with 1 pN. 1 mM Mg2+, Observed dissassembly, detachment. 0.3 µL yTub in beads (refrozen yTub post-spin). 20µM bTub, 1/50 seeds		1	0	1
2022-01-11	22_0711_070156	0.87334	0.024959	19.884	4.5828	0.085	-172.9	0.0347	Bead #2: Pre-loaded with 1 pN. 1 mM Mg2+, Observed dissassembly, detachment. 0.3 µL yTub in beads (refrozen yTub post-spin). 20µM bTub, 1/50 seeds		1	1	1
2022-01-11	22_0711_070321	0.8221	0.018527	12.135	5.8287	1.345	-177.76	0.0347	Bead #3: Pre-loaded with 1 pN. 1 mM Mg2+, Observed dissassembly, detachment. 0.3 µL yTub in beads (refrozen yTub post-spin). 20µM bTub, 1/50 seeds		1	0	1
2022-01-11	22_0711_070534	0.93006	0.01393	19.545	3.453	0.285	-177.55	0.0347	Bead #4: Pre-loaded with 1 pN. 1 mM Mg2+, Observed dissassembly, detachment. 0.3 µL yTub in beads (refrozen yTub post-spin). 20µM bTub, 1/50 seeds		1	1	1
2022-01-11	22_0711_070616	0.77529	0.018739	36.964	3.6602	0.32	179.59	0.0347	Bead #5: Pre-loaded with 1 pN. 1 mM Mg2+, Observed dissassembly, detachment. 0.3 µL yTub in beads (refrozen yTub post-spin). 20µM bTub, 1/50 seeds		1	1	1
2022-01-11	22_0711_070715	0.85131	0.020482	11.889	3.2394	0.08	178.53	0.0347	Bead #6: Pre-loaded with 1 pN. 1 mM Mg2+, Observed dissassembly, detachment. 0.3 µL yTub in beads (refrozen yTub post-spin). 20µM bTub, 1/50 seeds		1	0	1
2022-01-11	22_0711_070758	0.88249	0.018792	25.644	3.2574	0.125	178.23	0.0347	Bead #7: Pre-loaded with 1 pN. 1 mM Mg2+, Observed dissassembly, detachment. 0.3 µL yTub in beads (refrozen yTub post-spin). 20µM bTub, 1/50 seeds		1	1	1
2022-01-11	22_0711_070923	0.90524	0.010924	15.824	3.4036	0.245	-175.23	0.0347	Bead #8: Pre-loaded with 1 pN. 1 mM Mg2+, Observed dissassembly, detachment. 0.3 µL yTub in beads (refrozen yTub post-spin). 20µM bTub, 1/50 seeds		1	1	1
2022-01-11	22_0711_071359	0.83785	0.024309	11.808	3.5276	0.145	-180	0.0347	Bead #9: Pre-loaded with 1 pN. 1 mM Mg2+, Observed dissassembly, detachment. 0.3 µL yTub in beads (refrozen yTub post-spin). 20µM bTub, 1/50 seeds		1	1	1
2022-01-11	22_0711_071619	0.99633	0.042546	42.605	6.4609	0.165	-178.08	0.0347	Bead #10: Pre-loaded with 1 pN. 1 mM Mg2+, Observed dissassembly, detachment. 0.3 µL yTub in beads (refrozen yTub post-spin). 20µM bTub, 1/50 seeds		1	1	1
2022-01-11	22_0711_071714	0.90656	0.021342	18.128	7.8518	0.355	-167.69	0.0347	Bead #11: Pre-loaded with 1 pN. 1 mM Mg2+, Observed dissassembly, detachment. 0.3 µL yTub in beads (refrozen yTub post-spin). 20µM bTub, 1/50 seeds		1	0	1
2022-01-11	22_0711_071952	1.0315	0.014308	33.953	2.9693	0.2	-1.0513	0.0347	Bead #12: Pre-loaded with 1 pN. 1 mM Mg2+, Observed dissassembly, detachment. 0.3 µL yTub in beads (refrozen yTub post-spin). 20µM bTub, 1/50 seeds		1	1	1
2022-01-11	22_0711_072205	0.67516	0.0158	13.587	4.8459	0.265	177.9	0.0347	Bead #13: Pre-loaded with 1 pN. 1 mM Mg2+, Observed dissassembly, detachment. 0.3 µL yTub in beads (refrozen yTub post-spin). 20µM bTub, 1/50 seeds		1	0	1
2022-01-11	22_0711_072330	0.9189	0.021833	17.58	7.8207	0.35	179.72	0.0347	Bead #15: Pre-loaded with 1 pN. 1 mM Mg2+, Observed dissassembly, detachment. 0.3 µL yTub in beads (refrozen yTub post-spin). 20µM bTub, 1/50 seeds		1	0	1
2022-01-11	22_0711_072551	0.93069	0.026199	37.121	3.5145	0.115	177.88	0.0347	Bead #16: Pre-loaded with 1 pN. 1 mM Mg2+, Observed dissassembly, detachment. 0.3 µL yTub in beads (refrozen yTub post-spin). 17µM bTub, 1/50 seeds		1	1	1
2022-01-11	22_0711_073235	0.90266	0.02668	15.308	11.412	0.3	-170.72	0.0347	Bead #17: Pre-loaded with 1 pN. 1 mM Mg2+, Observed dissassembly, detachment. 0.3 µL yTub in beads (refrozen yTub post-spin). 17µM bTub, 1/50 seeds		1	0	1
2022-01-11	22_0711_073447	0.87866	0.016583	30.478	4.5426	0.52	-175.9	0.0347	Bead #18: Pre-loaded with 1 pN. 1 mM Mg2+, Observed dissassembly, detachment. 0.3 µL yTub in beads (refrozen yTub post-spin). 17µM bTub, 1/50 seeds		1	1	1
2022-01-11	22_0711_073611	0.78975	0.018022	25.902	3.9104	0.215	-176.68	0.0347	Bead #19: Pre-loaded with 1 pN. 1 mM Mg2+, Observed dissassembly, detachment. 0.3 µL yTub in beads (refrozen yTub post-spin). 17µM bTub, 1/50 seeds		1	1	1
2022-01-11	22_0711_073645	0.80288	0.023232	14.699	8.8497	0.165	-170.49	0.0347	Bead #20: Pre-loaded with 1 pN. 1 mM Mg2+, Observed dissassembly, detachment. 0.3 µL yTub in beads (refrozen yTub post-spin). 17µM bTub, 1/50 seeds		1	0	1
2022-01-11	22_0711_073951	0.87454	0.015637	16.31	3.4278	0.35	178.2	0.0347	Bead #21: Pre-loaded with 1 pN. 1 mM Mg2+, Observed dissassembly, detachment. 0.3 µL yTub in beads (refrozen yTub post-spin). 17µM bTub, 1/50 seeds		1	1	1
2022-01-11	22_0711_074036	0.72986	0.037403	25.24	4.9575	0.135	-175.12	0.0347	Bead #22: Pre-loaded with 1 pN. 1 mM Mg2+, Observed dissassembly, detachment. 0.3 µL yTub in beads (refrozen yTub post-spin). 17µM bTub, 1/50 seeds		1	1	1
2022-01-11	22_0711_074121	0.88322	0.022441	11.475	3.5619	0.16	179.74	0.0347	Bead #23: Pre-loaded with 1 pN. 1 mM Mg2+, Observed dissassembly, detachment. 0.3 µL yTub in beads (refrozen yTub post-spin). 17µM bTub, 1/50 seeds		1	0	1
2022-01-11	22_0711_074217	0.86253	0.021142	60.683	4.4753	0.125	-164.83	0.0347	Bead #24: Pre-loaded with 1 pN. 1 mM Mg2+, Observed dissassembly, detachment. 0.3 µL yTub in beads (refrozen yTub post-spin). 17µM bTub, 1/50 seeds		1	1	1
2022-01-11	22_0711_074827	0.91472	0.0081921	16.451	2.919	0.185	179.53	0.0347	Bead #25: Pre-loaded with 1 pN. 1 mM Mg2+, Observed dissassembly, detachment. 0.3 µL yTub in beads (refrozen yTub post-spin). 17µM bTub, 1/50 seeds		1	1	1
2022-01-11	22_0711_074914	0.86884	0.014096	8.5054	7.5103	0.29	175.78	0.0347	Bead #26: Pre-loaded with 1 pN. 1 mM Mg2+, Observed dissassembly, detachment. 0.3 µL yTub in beads (refrozen yTub post-spin). 17µM bTub, 1/50 seeds		1	0	1
2022-01-11	22_0711_075023	0.89624	0.014671	6.3528	2.668	0.64	-178.23	0.0347	Bead #27: Pre-loaded with 1 pN. 1 mM Mg2+, Observed dissassembly, detachment. 0.3 µL yTub in beads (refrozen yTub post-spin). 17µM bTub, 1/50 seeds		1	0	1
2022-01-11	22_0711_075101	0.80123	0.010188	10.248	3.1374	0.12	166.02	0.0347	Bead #28: Pre-loaded with 1 pN. 1 mM Mg2+, Observed dissassembly, detachment. 0.3 µL yTub in beads (refrozen yTub post-spin). 17µM bTub, 1/50 seeds		1	1	1
2022-01-11	22_0711_075210	0.74603	0.013572	30.612	3.5214	0.27	-169.14	0.0347	Bead #29: Pre-loaded with 1 pN. 1 mM Mg2+, Observed dissassembly, detachment. 0.3 µL yTub in beads (refrozen yTub post-spin). 17µM bTub, 1/50 seeds		1	1	1
2022-01-11	22_0711_075250	0.87224	0.025034	33.246	9.068	0.175	-177.94	0.0347	Bead #30: Pre-loaded with 1 pN. 1 mM Mg2+, Observed dissassembly, detachment. 0.3 µL yTub in beads (refrozen yTub post-spin). 17µM bTub, 1/50 seeds		1	1	1
2022-01-11	22_0711_075505	0.77321	0.019575	37.403	5.923	0.17	-176.26	0.0347	Bead #31: Pre-loaded with 1 pN. 1 mM Mg2+, Observed dissassembly, detachment. 0.3 µL yTub in beads (refrozen yTub post-spin). 17µM bTub, 1/50 seeds		1	1	1
2022-01-11	22_0711_075532	0.82271	0.029119	14.942	2.831	0.29	-177.1	0.0347	Bead #32: Pre-loaded with 1 pN. 1 mM Mg2+, Observed dissassembly, detachment. 0.3 µL yTub in beads (refrozen yTub post-spin). 17µM bTub, 1/50 seeds		1	1	1
2022-01-11	22_0711_075735	0.93504	0.023183	16.83	3.0575	0.12	-175.62	0.0347	Bead #33: Pre-loaded with 1 pN. 1 mM Mg2+, Observed dissassembly, detachment. 0.3 µL yTub in beads (refrozen yTub post-spin). 17µM bTub, 1/50 seeds		1	1	1
2022-01-11	22_0711_080050	0.88603	0.013123	15.815	2.4136	0.18	-171.38	0.0347	Bead #35: Pre-loaded with 1 pN. 1 mM Mg2+, Observed dissassembly, detachment. 0.3 µL yTub in beads (refrozen yTub post-spin). 17µM bTub, 1/50 seeds		1	1	1
2022-01-11	22_0711_080211	0.89326	0.022962	12.138	4.7368	0.49	171.71	0.0347	Bead #36: Pre-loaded with 1 pN. 1 mM Mg2+, Observed dissassembly, detachment. 0.3 µL yTub in beads (refrozen yTub post-spin). 17µM bTub, 1/50 seeds		1	0	1
2022-01-11	22_0711_080439	0.86513	0.026308	23.76	2.96	0.185	177.04	0.0347	Bead #37: Pre-loaded with 1 pN. 1 mM Mg2+, Observed dissassembly, detachment. 0.3 µL yTub in beads (refrozen yTub post-spin). 17µM bTub, 1/50 seeds		1	1	1
2022-01-11	22_0711_080602	0.88707	0.019059	12.13	2.7925	0.22	-176.93	0.0347	Bead #38: Pre-loaded with 1 pN. 1 mM Mg2+, Observed dissassembly, detachment. 0.3 µL yTub in beads (refrozen yTub post-spin). 17µM bTub, 1/50 seeds		1	1	1
2022-01-11	22_0711_080952	0.87144	0.027872	32.042	3.3533	0.19	-172.64	0.0347	Bead #39: Pre-loaded with 1 pN. 1 mM Mg2+, Observed dissassembly, detachment. 0.3 µL yTub in beads (refrozen yTub post-spin). 17µM bTub, 1/50 seeds		1	1	1
2022-01-11	22_0711_081051	0.95512	0.015763	15.394	3.8152	0.145	-175.57	0.0347	Bead #40: Pre-loaded with 1 pN. 1 mM Mg2+, Observed dissassembly, detachment. 0.3 µL yTub in beads (refrozen yTub post-spin). 17µM bTub, 1/50 seeds		1	1	1
2022-01-11	22_0711_081139	0.91415	0.016457	19.905	2.1694	0.465	174.8	0.0347	Bead #41: Pre-loaded with 1 pN. 1 mM Mg2+, Observed dissassembly, detachment. 0.3 µL yTub in beads (refrozen yTub post-spin). 17µM bTub, 1/50 seeds		1	1	1
2022-01-11	22_0711_081245	0.86106	0.019122	9.8679	3.3996	0.395	-172.87	0.0347	Bead #42: Pre-loaded with 1 pN. 1 mM Mg2+, Observed dissassembly, detachment. 0.3 µL yTub in beads (refrozen yTub post-spin). 17µM bTub, 1/50 seeds		1	0	1
2022-01-11	22_0711_081337	0.79275	0.024989	24.078	4.0986	0.06	-171.61	0.0347	Bead #43: Pre-loaded with 1 pN. 1 mM Mg2+, Observed dissassembly, detachment. 0.3 µL yTub in beads (refrozen yTub post-spin). 17µM bTub, 1/50 seeds		1	1	1
2022-01-11	22_0711_081431	0.86476	0.025993	9.9819	2.9493	0.265	-177.07	0.0347	Bead #44: Pre-loaded with 1 pN. 1 mM Mg2+, Observed dissassembly, detachment. 0.3 µL yTub in beads (refrozen yTub post-spin). 17µM bTub, 1/50 seeds		1	1	1
2022-01-11	22_0711_081552	0.90089	0.031336	13.134	5.2004	0.17	-175.77	0.0347	Bead #45: Pre-loaded with 1 pN. 1 mM Mg2+, Observed dissassembly, detachment. 0.3 µL yTub in beads (refrozen yTub post-spin). 17µM bTub, 1/50 seeds		1	0	1
2022-01-11	22_0711_081746	0.89922	0.024446	21.974	13.979	0.3	167.25	0.0347	Bead #46: Pre-loaded with 1 pN. 1 mM Mg2+, Observed dissassembly, detachment. 0.3 µL yTub in beads (refrozen yTub post-spin). 17µM bTub, 1/50 seeds		1	0	1
2022-01-11	22_0711_081839	1.1208	0.018999	18.191	4.0382	0.065	-10.142	0.0347	Bead #47: Pre-loaded with 1 pN. 1 mM Mg2+, Observed dissassembly, detachment. 0.3 µL yTub in beads (refrozen yTub post-spin). 17µM bTub, 1/50 seeds		1	1	1
2022-01-11	22_0711_082039	1.1261	0.021199	15.63	3.7917	0.07	2.8512	0.0347	Bead #48: Pre-loaded with 1 pN. 1 mM Mg2+, Observed dissassembly, detachment. 0.3 µL yTub in beads (refrozen yTub post-spin). 17µM bTub, 1/50 seeds		1	1	1
2022-01-11	22_0711_082200	0.81945	0.019011	16.58	3.1061	0.48	-177.29	0.0347	Bead #49: Pre-loaded with 1 pN. 1 mM Mg2+, Observed dissassembly, detachment. 0.3 µL yTub in beads (refrozen yTub post-spin). 17µM bTub, 1/50 seeds		1	1	1
2022-01-11	22_0711_082437	1.0611	0.011921	8.6718	3.8973	0.215	-5.6496	0.0347	Bead #50: Pre-loaded with 1 pN. 1 mM Mg2+, Observed dissassembly, detachment. 0.3 µL yTub in beads (refrozen yTub post-spin). 17µM bTub, 1/50 seeds		1	0	1
2022-01-11	22_0711_082612	0.90169	0.031055	10.428	2.8245	0.16	-178.05	0.0347	Bead #51: Pre-loaded with 1 pN. 1 mM Mg2+, Observed dissassembly, detachment. 0.3 µL yTub in beads (refrozen yTub post-spin). 17µM bTub, 1/50 seeds		1	1	1
2022-01-11	22_0711_082655	0.92693	0.021361	10.443	3.4464	0.065	-173.11	0.0347	Bead #52: Pre-loaded with 1 pN. 1 mM Mg2+, Observed dissassembly, detachment. 0.3 µL yTub in beads (refrozen yTub post-spin). 17µM bTub, 1/50 seeds		1	0	1
2022-01-11	22_0711_082744	0.86657	0.015437	14.292	4.2338	0.17	-173.38	0.0347	Bead #53: Pre-loaded with 1 pN. 1 mM Mg2+, Observed dissassembly, detachment. 0.3 µL yTub in beads (refrozen yTub post-spin). 17µM bTub, 1/50 seeds		1	0	1
2022-01-11	22_0711_083350	0.93521	0.011963	32.573	2.7374	0.19	-178.78	0.0347	Bead #54: Pre-loaded with 1 pN. 1 mM Mg2+, Observed dissassembly, detachment. 0.3 µL yTub in beads (refrozen yTub post-spin). 17µM bTub, 1/50 seeds		1	1	1
2022-01-11	22_0711_083711	0.90693	0.015663	13.426	2.4987	0.21	175.87	0.0347	Bead #55: Pre-loaded with 1 pN. 1 mM Mg2+, Observed dissassembly, detachment. 0.3 µL yTub in beads (refrozen yTub post-spin). 17µM bTub, 1/50 seeds		1	1	1
2022-01-11	22_0711_083742	0.9457	0.036997	18.317	20.242	0	-172.01	0.0347	Bead #56: Pre-loaded with 1 pN. 1 mM Mg2+, Observed dissassembly, detachment. 0.3 µL yTub in beads (refrozen yTub post-spin). 17µM bTub, 1/50 seeds		1	0	1
2022-01-11	22_0711_084035	0.87084	0.018848	9.7272	2.7809	0.14	170.57	0.0347	Bead #57: Pre-loaded with 1 pN. 1 mM Mg2+, Observed dissassembly, detachment. 0.3 µL yTub in beads (refrozen yTub post-spin). 17µM bTub, 1/50 seeds		1	1	1
2022-01-11	22_0711_084156	0.92341	0.012705	17.478	2.401	0.22	176.09	0.0347	Bead #58: Pre-loaded with 1 pN. 1 mM Mg2+, Observed dissassembly, detachment. 0.3 µL yTub in beads (refrozen yTub post-spin). 17µM bTub, 1/50 seeds		1	1	1
2022-01-11	22_0711_084246	0.87213	0.025567	18.396	2.959	0.075	-178.96	0.0347	Bead #59: Pre-loaded with 1 pN. 1 mM Mg2+, Observed dissassembly, detachment. 0.3 µL yTub in beads (refrozen yTub post-spin). 17µM bTub, 1/50 seeds		1	1	1
2022-01-11	22_0711_084329	0.95311	0.02406	23.222	6.8855	0.22	-177.77	0.0347	Bead #60: Pre-loaded with 1 pN. 1 mM Mg2+, Observed dissassembly, detachment. 0.3 µL yTub in beads (refrozen yTub post-spin). 17µM bTub, 1/50 seeds		1	1	1

## Sheet: Pulse amplitudes (yeast)
Date	Filename	Mean Force (pN)	Error Mean Force (pN)	Amplitude (nm)	Risetime (s)	Pulling Angle (deg.)	Spring Constant (pN/nm)	Sample Note	Evaluation Comment
2019-08-20	19_0820_034028	1.8861	0.047512	38.613	0.3	-177.1	0.0347	Bead #1: 2pN Preload. Observed disassembly and detachment of bead.
2019-08-20	19_0820_035708	3.6436	0.037407	72.317	0.16	178.67	0.0347	Bead #2: 4pN Preload. Observed disassembly and detachment of bead.
2019-08-20	19_0820_040640	1.5626	0.016191	42.839	0.145	-176.57	0.0347	Bead #3: 2pN Preload. Observed disassembly and detachment of bead.
2019-08-20	19_0820_040913	3.5782	0.028588	61.846	0.21	-173.54	0.0347	Bead #4: 4pN Preload. Observed disassembly and detachment of bead.
2019-08-20	19_0820_041133	1.4406	0.026401	40.38	0.43	-175.21	0.0347	Bead #5: 2pN Preload. Observed disassembly and detachment of bead.
2019-08-20	19_0820_041259	1.5544	0.041453	46.815	0.105	-178.54	0.0347	Bead #6: 2pN Preload. Observed disassembly and detachment of bead.
2019-08-20	19_0820_041959	3.4467	0.020005	25.009	0.34	-174.46	0.0347	Bead #6: 4pN Preload. Observed disassembly and detachment of bead.
2019-08-20	19_0820_042410	1.4584	0.028677	86.653	0.185	-173.98	0.0347	Bead #8: 2pN Preload. Observed disassembly and detachment of bead.
2019-08-20	19_0820_042609	3.8176	0.049061	54.83	0.105	-178.62	0.0347	Bead #9: 2pN Preload. Observed disassembly and detachment of bead.
2019-08-20	19_0820_043030	1.4422	0.03087	58.622	0.18	-168.89	0.0347	Bead #10: 2pN Preload. Observed disassembly and detachment of bead.
2019-08-20	19_0820_044221	3.8533	0.039628	71.558	0.19	-168.9	0.0347	Bead #11: 4pN Preload. Observed disassembly and detachment of bead.
2019-08-20	19_0820_044442	1.5121	0.064557	22.507	0.025	178.26	0.0347	Bead #12: 2pN Preload. Observed disassembly and detachment of bead.
2019-08-20	19_0820_045414	3.6103	0.031492	28.272	0.165	178.14	0.0347	Bead #13: 4pN Preload. Observed disassembly and detachment of bead.
2019-08-20	19_0820_045938	1.639	0.014381	81.26	0.53	172.4	0.0347	Bead #14: 2pN Preload. Observed disassembly and detachment of bead.
2019-08-20	19_0820_050516	3.6252	0.019151	40.654	0.12	-171.91	0.0347	Bead #15: 4pN Preload. Observed disassembly and detachment of bead.
2019-08-20	19_0820_051248	1.6476	0.025928	63.35	1.06	-165.03	0.0347	Bead #16: 2pN Preload. Observed disassembly and detachment of bead.
2019-08-20	19_0820_051640	3.6303	0.065269	26.871	0.045	-167.05	0.0347	Bead #17: 4pN Preload. Observed disassembly and detachment of bead.
2019-08-20	19_0820_052235	1.676	0.031262	74.787	0.1	-177.92	0.0347	Bead #18: 2pN Preload. Observed disassembly and detachment of bead.
2019-08-20	19_0820_052419	3.6173	0.038731	67.451	0.21	179.32	0.0347	Bead #19: 4pN Preload. Observed disassembly and detachment of bead.
2019-08-20	19_0820_052708	1.7085	0.012838	50.124	0.25	-158.15	0.0347	Bead #20: 2pN Preload. Observed disassembly and detachment of bead. Cutting laser on when bead detached
2019-08-20	19_0820_053022	3.6478	0.029881	40.212	0.165	-170.98	0.0347	Bead #21: 4pN Preload. Observed disassembly and detachment of bead.
2019-08-20	19_0820_054152	1.6526	0.025026	36.979	0.075	177.42	0.0347	Bead #22: 2pN Preload. Observed disassembly and detachment of bead.
2019-08-20	19_0820_054239	3.4746	0.2082	-32.936	0	-172.77	0.0347	Bead #23: 4pN Preload. Observed disassembly and detachment of bead.
2019-08-20	19_0820_055111	1.6548	0.024688	34.353	0.175	-171.68	0.0347	Bead #24: 2pN Preload. Observed disassembly and detachment of bead.
2019-08-20	19_0820_060122	3.5245	0.026717	29.053	0.16	179.96	0.0347	Bead #25: 4pN Preload. Observed disassembly and detachment of bead.
2019-08-20	19_0820_060216	1.6206	0.030406	58.679	0.13	-174.03	0.0347	Bead #26: 2pN Preload. Observed disassembly and detachment of bead.
2019-08-20	19_0820_060623	3.184	0.062394	77.441	0.1	-165.69	0.0347	Bead #27: 4pN Preload. Observed disassembly and detachment of bead.
2019-08-20	19_0820_061219	1.1765	0.02031	51.514	0.34	178.8	0.0347	Bead #28: 4pN Preload. Observed disassembly and detachment of bead.
2019-08-21	19_0821_033843	6.9047	0.045062	44.818	0.16	-176.71	0.0683	Bead #9: 8pN Preload. Observed disassembly and detachment of bead.
2019-08-21	19_0821_034435	4.6437	0.014668	3.6396	0.1	179.91	0.0683	Bead #10: 6pN Preload. Observed disassembly and detachment of bead. Cutting laser on during detachment
2019-08-21	19_0821_041059	7.6491	0.04204	6.0339	0	172.54	0.0683	Bead #11: 8pN Preload. Observed disassembly and detachment of bead.
2019-08-21	19_0821_041223	3.6845	0.088828	26.196	0.075	-177.63	0.0683	Bead #12: 4pN Preload. Observed disassembly and detachment of bead.
2019-08-21	19_0821_041707	5.7406	0.046921	25.836	0.075	177.58	0.0683	Bead #13: 6pN Preload. Observed disassembly and detachment of bead.
2019-08-21	19_0821_042028	7.8065	0.063434	19.656	0.36	-174.33	0.0683	Bead #14: 8pN Preload. Observed disassembly and detachment of bead.
2019-08-21	19_0821_042559	3.6011	0.39814	0.02125	0.045	179.62	0.0683	Bead #15: 4pN Preload. Observed disassembly and detachment of bead.
2019-08-21	19_0821_042714	5.6998	0.032864	34.724	0.72	-173.8	0.0683	Bead #16: 6pN Preload. Observed disassembly and detachment of bead.
2019-08-21	19_0821_043300	5.6349	0.026738	25.021	0.095	179.06	0.0683	Bead #17: 6pN Preload. Observed disassembly and detachment of bead.
2019-08-21	19_0821_044757	3.5947	0.03855	49.813	0.13	-177.97	0.0683	Bead #18: 4pN Preload. Observed disassembly and detachment of bead.
2019-08-21	19_0821_045158	5.5572	0.097669	28.323	0.07	178.9	0.0683	Bead #19: 6pN Preload. Observed disassembly and detachment of bead.
2019-08-21	19_0821_050940	7.5596	0.055602	26.102	0.105	-177.6	0.0683	Bead #20: 8pN Preload. Observed disassembly and detachment of bead.
2019-08-21	19_0821_051349	3.5214	0.037438	33.778	0.14	179.92	0.0683	Bead #21: 4pN Preload. Observed disassembly and detachment of bead.
2019-08-21	19_0821_052028	5.4851	0.027203	3.4062	0.04	-178.49	0.0683	Bead #22: 6pN Preload. Observed disassembly and detachment of bead.
2019-08-21	19_0821_052453	7.4456	0.074909	27.022	0.13	-177.31	0.0683	Bead #23: 8pN Preload. Observed disassembly and detachment of bead.
2019-08-21	19_0821_052916	3.436	0.012661	14.063	0.26	-172.95	0.0683	Bead #24: 4pN Preload. Observed disassembly and detachment of bead.
2019-08-21	19_0821_053140	5.4266	0.10257	30.168	0.255	175.4	0.0683	Bead #25: 6pN Preload. Observed disassembly and detachment of bead.
2019-08-21	19_0821_053315	7.2996	0.031131	22.982	0.195	174.65	0.0683	Bead #26: 8pN Preload. Observed disassembly and detachment of bead.
2019-08-21	19_0821_055052	3.4555	0.062016	24.089	0.065	-175.79	0.0683	Bead #27: 4pN Preload. Observed disassembly and detachment of bead.
2019-08-21	19_0821_055346	5.4001	0.019728	14.815	0.105	-179.94	0.0683	Bead #28: 6pN Preload. Observed disassembly and detachment of bead.
	15_1008_013143 poster child pulse 1.7 pN	1.71402	0.0693812	67.2832	0.125	6.7291	0.1053	Driver 2017 Dataset: Chip
	15_1008_014336 clear pulse double pump 1.6 pN	1.57206	0.0665732	88.9582	0.145	6.53603	0.1053	Driver 2017 Dataset: Chip
	15_1008_015023 clear pulse 1.9 pN	1.94771	0.0862462	55.7271	0.245	7.33726	0.1053	Driver 2017 Dataset: Chip
	15_0930_055236 clear pulse but true force unknown	1.20382	0.0102866	19.5429	0.045	-1.11998	0.0174	Driver 2017 Dataset: Chip
	15_0930_055540 huge poster child pulse 1.3 pN	1.27713	0.0810842	95.7914	0.165	28.0137	0.1053	Driver 2017 Dataset: Chip
	15_0930_060113 huge poster child pulse 2.5 pN	2.52493	0.0508675	35.7179	0.245	-11.8838	0.1053	Driver 2017 Dataset: Chip
	15_0930_060639 decent pulse 4.5 pN	4.52494	0.0420844	25.4462	0.305	1.30062	0.1053	Driver 2017 Dataset: Chip
	15_0930_060827 beautiful poster child pulse with second pump 4 pN	4.04815	0.0513208	64.8755	0.145	6.71649	0.1053	Driver 2017 Dataset: Chip
	15_0930_061029 poster child pulse 2 pN	2.10335	0.0759461	37.303	0.145	-17.0529	0.1053	Driver 2017 Dataset: Chip
	15_0930_061210 good pulse 2 pN	2.15481	0.0677258	38.8064	0.225	-2.32955	0.1053	Driver 2017 Dataset: Chip
	15_0930_061514 clear nice pulse 6 pN	6.17628	0.0497295	34.099	0.245	1.70443	0.1053	Driver 2017 Dataset: Chip
	15_0930_061703 clear small pulse 6 pN low noise	6.15342	0.0435678	21.824	0.125	2.81569	0.1053	Driver 2017 Dataset: Chip
	15_0930_061911 no clear pulse at 10 pN	7.19429	1.20813	2.92171	0.005	-11.3042	0.1053	Driver 2017 Dataset: Chip
	15_0930_062134 maybe a micro pulse 8.3 pN	8.30581	0.121821	8.74921	0.065	-0.303941	0.1053	Driver 2017 Dataset: Chip
	15_0930_062823 no clear pulse whatsoever 8.4 pN	8.43817	0.0817272	0.515619	0.005	4.31115	0.1053	Driver 2017 Dataset: Chip
	15_0930_063141 decent pulse 4.3 pN	4.31729	0.0566656	28.7773	0.285	-1.36026	0.1053	Driver 2017 Dataset: Chip	Classic Wave, low bsn
	15_0930_063337 clear pulse 2.3 pN	2.28172	0.0442739	45.4196	0.105	4.76369	0.1053	Driver 2017 Dataset: Chip
	15_0721_024653 weird event with apparent DDM afterward 2.6 pN	2.64438	0.0716267	39.2911	0.085	7.6282	0.1053	Driver 2017 Dataset: Chip
	15_0721_025511 decent pulse at 2.8 pN	2.81327	0.0569995	27.6006	0.145	-23.0953	0.1053	Driver 2017 Dataset: Chip
	15_0721_025927 tiney pulse at 10 pN	10.243	0.0995454	13.3742	0.065	0.652943	0.1053	Driver 2017 Dataset: Chip
	15_0721_030344 tiny pulse at 8 pN	7.96206	0.0598518	16.4945	0.165	-2.93894	0.1053	Driver 2017 Dataset: Chip
	15_0721_030756 good pulse at 6 pN	5.88189	0.0440545	23.6382	0.265	-3.02227	0.1053	Driver 2017 Dataset: Chip
	15_0721_032059 nice pulse at 4 pN	4.30982	0.0477988	25.1414	0.145	-6.22478	0.1053	Driver 2017 Dataset: Chip	Classic Wave, low bsn
	15_0721_033052 poster child pulse at 2.8 pN	2.7685	0.0712367	74.7927	0.165	-0.622355	0.1053	Driver 2017 Dataset: Chip
	15_0720_030225 decent pulse at 4 pN	4.10417	0.0710166	28.0325	0.145	13.5348	0.1053	Driver 2017 Dataset: Chip
	15_0720_030625 clear pulse at 4 pN	3.93649	0.0515182	17.9667	0.225	4.96386	0.1053	Driver 2017 Dataset: Chip
	15_0720_031152 clear pulse at 6 pN	6.13216	0.0406076	23.0827	0.185	1.2282	0.1053	Driver 2017 Dataset: Chip
	15_0720_031637 posterchild big pulse at 2.1 pN	2.16529	0.0728271	52.6849	0.125	-0.152551	0.1053	Driver 2017 Dataset: Chip
	15_0720_031851 posterchild nice big pulse 2 pN	1.99929	0.0625879	48.73	0.125	-2.15398	0.1053	Driver 2017 Dataset: Chip
	15_0720_032134 nice clean posterchild pulse 3 pN	2.93254	0.0724445	53.1801	0.125	-3.98225	0.1053	Driver 2017 Dataset: Chip
	15_0720_032717 small clear pulse at 6 pN	5.92542	0.0994987	11.9691	0.045	0.969565	0.1053	Driver 2017 Dataset: Chip
	15_0720_033442 ugly small double pump pulse but ok 4.5 pN	5.36783	0.0495374	13.5067	0.145	0.399249	0.1053	Driver 2017 Dataset: Chip
	15_0720_034042 clear small pulse 5.8 pN	5.76943	0.0560037	26.3158	0.145	-0.137502	0.1053	Driver 2017 Dataset: Chip
	15_0720_034345 tiny pulse 7.7 pN	7.71136	0.17518	6.87548	0.025	4.63233	0.1053	Driver 2017 Dataset: Chip
	15_0421_013645 nice pulse 1 pN	0.952098	0.0256034	49.8884	0.185	1.98902	0.0174	Driver 2017 Dataset: Jonathan
	15_0421_013902 nice pulse 1.1 pN	1.05101	0.0194711	68.8129	0.185	-19.3689	0.0174	Driver 2017 Dataset: Jonathan
	15_0421_014030 sharp pulse low stiffness 0.7 pN	0.665206	0.0235124	78.3875	0.045	-0.387085	0.0174	Driver 2017 Dataset: Jonathan
	15_0421_014207 nice pulse 1 pN	1.0176	0.0238592	80.6762	0.125	12.2723	0.0174	Driver 2017 Dataset: Jonathan
	15_0421_014401 huge double pulse 1 pN	1.02738	0.0175734	101.56	0.145	-5.82785	0.0174	Driver 2017 Dataset: Jonathan
	15_0421_015108 really nice clean pulse 0.9 pN	0.913693	0.0210594	76.1603	0.125	-29.9867	0.0174	Driver 2017 Dataset: Jonathan
	15_0421_015537 okay pulse 1 pN	0.981707	0.0187252	29.7369	0.185	9.96619	0.0174	Driver 2017 Dataset: Jonathan
	15_0421_020325 great pulse posterchild 1 pN	1.02658	0.0170226	64.6704	0.125	-6.80173	0.0174	Driver 2017 Dataset: Jonathan
	15_0421_020712 great pulse 0.9 pN	0.938369	0.0196333	67.5777	0.085	11.8467	0.0174	Driver 2017 Dataset: Jonathan
	15_0421_021211 tiny pulse 0.6 pN	0.644355	0.0237095	30.219	0.045	9.99635	0.0174	Driver 2017 Dataset: Jonathan
	15_0421_021420 good small pulse 1 pN	0.95661	0.0200312	60.7692	0.105	5.90977	0.0174	Driver 2017 Dataset: Jonathan
	15_0421_021756 huge pulse 0.9 pN	0.867043	0.0220544	124.403	0.185	-9.11521	0.0174	Driver 2017 Dataset: Jonathan
	15_0421_022154 huge posterchild pulse 1.1 pN	1.06999	0.0196728	73.1903	0.145	1.13773	0.0174	Driver 2017 Dataset: Jonathan
	15_0421_022333 modest double pulse 0.9 pN	0.944433	0.0236382	49.5076	0.265	-8.59517	0.0174	Driver 2017 Dataset: Jonathan
	15_0421_022659 sharp large pulse 1.1 pN	1.08253	0.0188859	101.088	0.085	7.42326	0.0174	Driver 2017 Dataset: Jonathan
	15_0421_022827 super nice pulse with doublet 1 pN	0.995294	0.0197025	91.0494	0.065	-6.23521	0.0174	Driver 2017 Dataset: Jonathan
	15_0421_022906 another nice posterchild 1 pN	1.04311	0.0170395	78.564	0.125	3.44081	0.0174	Driver 2017 Dataset: Jonathan
	15_0421_023018 baseline sucks 1 pN	0.957055	0.0213137	52.622	0.145	8.10405	0.0174	Driver 2017 Dataset: Jonathan
	15_0421_023518 decent pulse 1.1 pN	1.13968	0.0245274	67.7091	0.045	12.1749	0.0174	Driver 2017 Dataset: Jonathan
	15_0421_023847 huge great posterchild pulse 1 pN	1.03606	0.0187787	106.489	0.125	-5.39002	0.0174	Driver 2017 Dataset: Jonathan
	15_0421_024101 big double pulse 1 pN	0.968196	0.0126109	41.0533	0.205	11.5896	0.0174	Driver 2017 Dataset: Jonathan
	15_0421_024309 huge pulse with two large features 1 pN	0.99619	0.0186833	273.038	0.825	3.82717	0.0174	Driver 2017 Dataset: Jonathan
	15_0421_024433 another huge pulse two large features 1.1 pN	1.0776	0.0269634	336.147	0.545	3.52844	0.0174	Driver 2017 Dataset: Jonathan
	15_0421_024531 decent pulse noisy baseline 1 pN	1.01933	0.0303335	84.4229	0.185	12.4725	0.0174	Driver 2017 Dataset: Jonathan
	15_0421_025309 nice pulse 1 pN	0.992868	0.0198648	68.9197	0.085	1.7564	0.0174	Driver 2017 Dataset: Jonathan
	15_0421_025445 huge clear pulse with doublet 1 pN	1.03586	0.0177128	75.556	0.145	-1.81298	0.0174	Driver 2017 Dataset: Jonathan
	15_0421_025627 nice pulse with doublet 1 pN	0.955441	0.0200261	41.9699	0.065	5.64213	0.0174	Driver 2017 Dataset: Jonathan
	15_0421_025922 very nice big pulse 1 pN	0.970127	0.0236288	71.0051	0.065	-5.85008	0.0174	Driver 2017 Dataset: Jonathan
	15_0421_030034 odd looking pulse but okay 1 pN	0.992452	0.0226556	155.952	0.205	-5.57333	0.0174	Driver 2017 Dataset: Jonathan
	15_0421_030241 decent pulse 1 pN	1.01641	0.0241711	47.0476	0.085	-9.28136	0.0174	Driver 2017 Dataset: Jonathan
	15_0420_064627 good wave 1.3 pN	1.30297	0.0645657	40.7966	0.085	-6.8705	0.1053	Driver 2017 Dataset: Jonathan
	15_0420_070952 good wave 1.4 pN	1.42236	0.0568503	61.0832	0.165	22.2708	0.1053	Driver 2017 Dataset: Jonathan
	15_0420_071228 great wave 1.5 pN	1.48272	0.0696905	109.068	0.145	-0.98113	0.1053	Driver 2017 Dataset: Jonathan
	15_0420_071533 nice wave 0.8 pN	0.838657	0.0416448	50.0309	0.325	-25.4322	0.1053	Driver 2017 Dataset: Jonathan
	15_0420_071829 totally huge complex pulse 0.6 pN	0.645159	0.074372	86.6509	0.565	-20.6352	0.1053	Driver 2017 Dataset: Jonathan
	15_0420_072027 very nice posterchild pulse 1.2 pN	1.19338	0.0612567	79.2866	0.125	11.2827	0.1053	Driver 2017 Dataset: Jonathan
	15_0420_072310 no real pulse here 1.5 pN	1.47306	0.0977887	15.7153	0.045	1.77238	0.1053	Driver 2017 Dataset: Jonathan
	15_0420_072827 nice pulse 0.8 pN	0.825169	0.0711351	42.2605	0.045	12.7383	0.1053	Driver 2017 Dataset: Jonathan
	15_0420_073230 funny flattop pulse but clear 0.9 pN	0.888316	0.0659889	54.2484	0.525	-9.00078	0.1053	Driver 2017 Dataset: Jonathan
	15_0420_074949 posterchild 1.1 pN	1.09018	0.0711564	88.3141	0.285	-9.96466	0.1053	Driver 2017 Dataset: Jonathan
	15_0420_075241 humongous pulse 1.2 pN	1.16519	0.099502	98.7154	0.225	-2.04311	0.1053	Driver 2017 Dataset: Jonathan
	15_0420_080016 humongous pulse 1 pN	0.984757	0.0771202	74.3512	0.185	12.2452	0.1053	Driver 2017 Dataset: Jonathan
	15_0420_080301 decent pulse noisy baseline 1 pN	1.00022	0.0499903	32.0666	0.185	25.8769	0.1053	Driver 2017 Dataset: Jonathan
	15_0420_081357 big double pump pulse 0.9 pN	0.939967	0.0654538	89.2849	0.545	-9.49323	0.1053	Driver 2017 Dataset: Jonathan
	15_0420_081745 nice pulse 1.2 pN	1.16296	0.0701024	39.217	0.085	1.33653	0.1053	Driver 2017 Dataset: Jonathan
	15_0420_015321 nice pulse 1 pN	1.00802	0.0196282	77.0441	0.325	14.8122	0.0174	Driver 2017 Dataset: Jonathan
	15_0420_020424 sharp clean pulse 1.2 pN	1.1875	0.0195778	91.2078	0.085	36.5841	0.0174	Driver 2017 Dataset: Jonathan
	15_0420_020952 good pulse 1 pN	1.02746	0.020169	85.4866	0.125	26.8366	0.0174	Driver 2017 Dataset: Jonathan
	15_0420_022906 nice pulse 0.9 pN	0.949722	0.021483	98.4293	0.125	-21.364	0.0174	Driver 2017 Dataset: Jonathan
	15_0420_023410 excellent pulse 1.1 pN	1.08454	0.0154531	82.459	0.125	5.40288	0.0174	Driver 2017 Dataset: Jonathan
	15_0420_023836 fine pulse 0.9 pN	0.949911	0.0175704	88.4444	0.125	1.43415	0.0174	Driver 2017 Dataset: Jonathan
	15_0420_025354 okay pulse 1.1 pN	1.0634	0.0257319	61.0775	0.145	17.1307	0.0174	Driver 2017 Dataset: Jonathan
	15_0417_010116 tiny pulse 9.5 pN	9.51347	0.104484	14.277	0.125	-1.82064	0.23	Driver 2017 Dataset: Jonathan
	15_0417_010346 very clear pulse amazing hi force 11 pN	11.2804	0.082649	18.2519	0.125	14.373	0.23	Driver 2017 Dataset: Jonathan
	15_0417_010919 posterchild pulse 2.9 pN	2.88643	0.0882124	44.3057	0.165	-6.51011	0.23	Driver 2017 Dataset: Jonathan
	15_0417_012000 weird slow pulse 2.4 pN	2.35476	0.124992	51.0585	1.365	-1.27564	0.23	Driver 2017 Dataset: Jonathan
	15_0417_012207 tiny wave barely above noise 4.3 pN	4.30459	0.0926059	17.3621	0.285	18.6668	0.23	Driver 2017 Dataset: Jonathan
	15_0417_012435 huge pulse 4 pN	4.01299	0.0929577	45.358	0.065	1.98866	0.23	Driver 2017 Dataset: Jonathan
	15_0417_012729 clear poster pulse 6.1 pN	6.13892	0.11909	40.7418	0.105	5.70598	0.23	Driver 2017 Dataset: Jonathan
	15_0417_012924 no pulse over noise 5.9 pN	5.92906	0.0951721	5.47153	0.445	0.211267	0.23	Driver 2017 Dataset: Jonathan
	15_0417_013046 clear pulse 7.6 pN	7.61861	0.0810179	21.2191	0.225	0.175557	0.23	Driver 2017 Dataset: Jonathan
	15_0417_013448 poster pulse 7.2 pN	7.17964	0.215739	21.183	0.045	0.00251065	0.23	Driver 2017 Dataset: Jonathan
	15_0417_013740 tiny pulse with pre doublet 8.9 pN	8.94725	0.183611	15.3125	0.065	10.3301	0.23	Driver 2017 Dataset: Jonathan
	15_0417_015158 huge poster pulse 1.7 pN	1.73011	0.0907173	50.1402	0.205	16.8855	0.23	Driver 2017 Dataset: Jonathan
	15_0417_042116 nice clear pulse 2.3 pN	2.32396	0.0781314	34.5859	0.165	24.7929	0.23	Driver 2017 Dataset: Jonathan
	15_0417_042553 nice pulse slow baseline drift 3.3 pN	3.28939	0.0655846	23.6145	0.125	-0.000195049	0.23	Driver 2017 Dataset: Jonathan
	15_0417_044015 tiny pulse lotsa noise 2.1 pN	2.13165	0.128793	21.7587	0.125	-27.4442	0.23	Driver 2017 Dataset: Jonathan
	15_0417_044213 clear pulse 2.1 pN	2.08511	0.119154	50.7782	0.065	16.3961	0.23	Driver 2017 Dataset: Jonathan
	15_0417_044402 good pulse 5.4 pN	5.35915	0.111899	14.839	0.065	14.1885	0.23	Driver 2017 Dataset: Jonathan
	15_0417_045013 clear pulse 6.5 pN	6.53886	0.110652	23.4139	0.105	14.4188	0.23	Driver 2017 Dataset: Jonathan
	15_0417_045320 no pulse 7.9 pN	7.85797	0.0887051	3.84221	0.005	8.18203	0.23	Driver 2017 Dataset: Jonathan
	15_0417_045629 clear pulse 8.1 pN	8.10135	0.103906	23.8808	0.105	-7.36469	0.23	Driver 2017 Dataset: Jonathan
	15_0417_050357 tiny pulse 8.8 pN	8.79251	0.173774	17.8293	0.125	0.149414	0.23	Driver 2017 Dataset: Jonathan
	15_0417_050527 small pulse 10 pN	10.183	0.111392	6.85285	0.065	1.78978	0.23	Driver 2017 Dataset: Jonathan
	15_0417_050713 big pulse clear 9.9 pN	9.92879	0.0610928	27.3478	0.265	2.20416	0.23	Driver 2017 Dataset: Jonathan
	15_0417_050908 big ugly pulse 2.2 pN	2.22915	0.07694	49.2165	0.525	3.62677	0.23	Driver 2017 Dataset: Jonathan
	15_0417_051406 clear pulse 2.8 pN	2.84934	0.098364	27.6449	0.305	-4.92818	0.23	Driver 2017 Dataset: Jonathan
	15_0417_051845 big clear pulse 4.3 pN	4.33648	0.111149	42.9056	0.185	3.24482	0.23	Driver 2017 Dataset: Jonathan
	15_0417_052322 poster pulse 4.4 pN	4.40986	0.111875	29.4213	0.105	-2.94446	0.23	Driver 2017 Dataset: Jonathan
	15_0417_052529 tiny sharp pulse 6.2 pN	6.23814	0.182233	18.672	0.065	9.22354	0.23	Driver 2017 Dataset: Jonathan
	15_0417_052907 clear pulse 5 pN	5.02652	0.152828	17.074	0.045	1.09472	0.23	Driver 2017 Dataset: Jonathan
	15_0417_053515 clear sharp poster pulse 8.1 pN	8.101	0.153058	38.5588	0.085	0.377992	0.23	Driver 2017 Dataset: Jonathan
	15_0417_053652 tiny clear pulse 8.3 pN	8.25449	0.0964966	9.97567	0.065	2.50701	0.23	Driver 2017 Dataset: Jonathan
	15_0417_122326 big pulse clear 1.3 pN	1.32231	0.140229	51.8009	0.145	-45.9497	0.23	Driver 2017 Dataset: Jonathan
	15_0417_123753 tiny pulse lotsa noise 2.7 pN	2.70346	0.0957778	16.4809	0.065	3.03555	0.23	Driver 2017 Dataset: Jonathan
	15_0417_123912 tiny pulse clear 3.7 pN	3.67111	0.0998971	16.0053	0.105	2.60988	0.23	Driver 2017 Dataset: Jonathan
	15_0417_124200 big poster pulse 4.1 pN	4.0984	0.116094	45.0179	0.105	-0.475878	0.23	Driver 2017 Dataset: Jonathan
	15_0417_124341 clean pulse 3.7 pN	3.67756	0.0891574	34.4121	0.105	11.667	0.23	Driver 2017 Dataset: Jonathan
	15_0417_124511 clear pulse 6.1 pN	6.06979	0.111503	25.1764	0.105	-2.694	0.23	Driver 2017 Dataset: Jonathan
	15_0417_124914 clear pulse 5.9 pN	5.91657	0.125492	26.036	0.105	8.10299	0.23	Driver 2017 Dataset: Jonathan
	15_0417_125144 tiny clear pulse 8.1 pN	8.08665	0.181048	10.1264	0.045	-2.38013	0.23	Driver 2017 Dataset: Jonathan
	15_0417_125602 small slow pulse possible illustrator 8.1 pN	8.0742	0.0738357	12.0031	0.345	-0.569449	0.23	Driver 2017 Dataset: Jonathan
	15_0417_125730 tiny pulse possible poster 9.4 pN	9.4304	0.077582	23.9043	0.245	-4.60586	0.23	Driver 2017 Dataset: Jonathan
	15_0416_010337 clear pulse 5.8 pN	5.81236	0.131311	21.3006	0.105	6.50268	0.1053	Driver 2017 Dataset: Jonathan
	15_0416_010842 nice pulse 6 pN	5.97624	0.0490219	30.6366	0.085	-2.24674	0.1053	Driver 2017 Dataset: Jonathan
	15_0416_011053 poster pulse 5.8 pN	5.80086	0.0650665	40.2955	0.125	18.3005	0.1053	Driver 2017 Dataset: Jonathan
	15_0416_011439 pulse but drift 3.2 pN	3.22387	0.0484684	24.5419	0.065	8.65235	0.1053	Driver 2017 Dataset: Jonathan
	15_0416_011558 big clear pulse 2 pN	1.99984	0.0643497	49.2067	0.085	25.4372	0.1053	Driver 2017 Dataset: Jonathan
	15_0416_012322 clear pulse 7.7 pN	7.71063	0.0390643	29.7479	0.165	-1.54451	0.1053	Driver 2017 Dataset: Jonathan
	15_0416_012630 tiny sharp pulse 7.2 pN	7.17107	0.0759217	21.4587	0.045	19.308	0.1053	Driver 2017 Dataset: Jonathan
	15_0416_012959 small pulse 7.4 pN	7.44125	0.0492266	20.7819	0.145	14.5149	0.1053	Driver 2017 Dataset: Jonathan
	15_0416_013348 good pulse 8.2 pN	8.17896	0.0563865	30.797	0.145	-1.43122	0.1053	Driver 2017 Dataset: Jonathan
	15_0416_013522 tiny pulse 9.3 pN	9.32089	0.0516017	14.6064	0.105	7.38231	0.1053	Driver 2017 Dataset: Jonathan
	15_0416_013730 short sharp pulse 10 pN	10.082	0.0343721	15.6655	0.065	-0.110595	0.1053	Driver 2017 Dataset: Jonathan
	15_0416_014445 tiny pulse 9.8 pN	9.75322	0.0423315	14.296	0.025	-1.27656	0.1053	Driver 2017 Dataset: Jonathan
	15_0416_014818 large pulse 0.9 pN	0.910262	0.0309784	86.4546	0.125	6.20509	0.0174	Driver 2017 Dataset: Jonathan
	15_0416_124826 modest pulse 4.2 pN	4.17804	0.0724249	35.6041	0.145	-5.78317	0.1053	Driver 2017 Dataset: Jonathan
	15_0416_125131 pulse 4.1 pN	4.1507	0.072708	34.7391	0.085	-11.7652	0.1053	Driver 2017 Dataset: Jonathan
	15_0416_125626 nice poster pulse 6 pN	6.06789	0.0598786	46.3745	0.16	20.4826	0.1053	Driver 2017 Dataset: Jonathan
	15_0415_045445 good pulse 3.1 pN	3.07524	0.0868261	26.2762	0.205	28.7902	0.1053	Driver 2017 Dataset: Jonathan
	15_0415_045715 tiny pulse 7.3 pN	7.31414	0.0743501	14.1407	0.065	-8.98974	0.1053	Driver 2017 Dataset: Jonathan
	15_0415_050514 nice sharp pulse 8.1 pN	8.0989	0.0980129	22.1051	0.085	-5.35442	0.1053	Driver 2017 Dataset: Jonathan
	15_0415_051245 pulse after fallback 2.8 pN	2.83253	0.0719342	-3.99355	0.025	-3.01328	0.1053	Driver 2017 Dataset: Jonathan
	15_0415_051511 very sharp pulse 2.3 pN	2.34235	0.0723147	45.2644	0.065	-2.54652	0.1053	Driver 2017 Dataset: Jonathan
	15_0415_052003 decent pulse 3.9 pN	3.921	0.0632724	37.4316	0.105	-4.37023	0.1053	Driver 2017 Dataset: Jonathan
	15_0415_052700 modest pulse 5.2 pN	5.19612	0.0559655	35.8102	0.125	-1.36324	0.1053	Driver 2017 Dataset: Jonathan
	15_0414_042841 pulse after partial fallback 3.1 pN	3.13541	0.0851771	6.49228	0.105	18.8277	0.1053	Driver 2017 Dataset: Jonathan
	15_0414_043127 big double pulse 3 pN	3.02008	0.0406812	46.8207	0.065	-16.0993	0.1053	Driver 2017 Dataset: Jonathan
	15_0414_043450 big clear pulse poster 4 pN	4.00115	0.0947678	39.5472	0.065	2.22709	0.1053	Driver 2017 Dataset: Jonathan
	15_0414_043841 no pulse 4.4 pN	4.36686	0.0829779	11.8345	0.105	3.25795	0.1053	Driver 2017 Dataset: Jonathan
	15_0414_050048 good pulse 6.5 pN	6.51225	0.0979515	34.8329	0.105	2.50268	0.1053	Driver 2017 Dataset: Jonathan
	15_0414_050735 no pulse 6.6 pN	6.65247	0.0651101	8.46468	0.145	-9.69948	0.1053	Driver 2017 Dataset: Jonathan
	15_0414_051250 maybe tiny pulse 5.8 pN	5.83087	0.125926	18.3517	0.025	-1.60852	0.1053	Driver 2017 Dataset: Jonathan
	15_0204_041704 very tiny pulse 5 pN	5.03474	0.097301	18.0321	0.065	-4.16861	0.1053	Driver 2017 Dataset: Chip
	15_0204_041910 pulse weird stuff after 3.8 pN	3.76083	0.0783618	34.8386	0.105	18.6222	0.1053	Driver 2017 Dataset: Chip
	15_0204_042416 not clear 4.6 pN	4.61286	0.0635948	26.1148	0.085	-2.97092	0.1053	Driver 2017 Dataset: Chip
	15_0204_043323 good 4.5 pN	4.48277	0.0799475	51.1016	0.105	-11.8212	0.1053	Driver 2017 Dataset: Chip
	15_0204_044148 nice 4.1 pN	4.06383	0.0651471	52.0432	0.165	-16.8147	0.1053	Driver 2017 Dataset: Chip
	15_0204_044502 good pulse 4.1 pN	4.15032	0.0820757	46.9738	0.105	-0.0978356	0.1053	Driver 2017 Dataset: Chip
	15_0204_045055 tiny wave 3.9 pN	3.93574	0.0711021	17.2245	0.065	-11.2865	0.1053	Driver 2017 Dataset: Chip
	15_0204_045541 not clear 4.2 pN	4.16422	0.108549	21.0382	0.145	-0.928832	0.1053	Driver 2017 Dataset: Chip
	15_0204_045755 good pulse 4.2 pN	4.18827	0.117984	45.05	0.12	-5.36932	0.1053	Driver 2017 Dataset: Chip
	15_0204_050302 poster sharp 4 pN	3.95438	0.102393	62.7	0.185	1.87217	0.1053	Driver 2017 Dataset: Chip
	15_0204_051752 clear pulse 4.2 pN	4.16136	0.0875178	59.0227	0.185	-0.911906	0.1053	Driver 2017 Dataset: Chip
	15_0204_052104 nice pulse 4 pN	3.95537	0.080851	56.8785	0.105	-4.9345	0.1053	Driver 2017 Dataset: Chip
	15_0204_052304 sharp pulse 3.9 pN	3.89399	0.141515	43.4104	0.065	-9.37146	0.1053	Driver 2017 Dataset: Chip
	15_0204_052459 nice sharp pulse 3.8 pN	3.8361	0.0597293	44.1134	0.065	-4.43735	0.1053	Driver 2017 Dataset: Chip
	15_0204_053704 no clear pulse here 3.7 pN	3.65722	0.0904483	31.8572	0.105	0.421016	0.1053	Driver 2017 Dataset: Chip
	15_0204_054836 nice pulse 3.7 pN	3.6633	0.0698783	41.4244	0.065	-7.31817	0.1053	Driver 2017 Dataset: Chip
	15_0417_124200 big poster pulse 4.1 pN	4.0984	0.116094	45.0179	0.105	-0.475878	0.23	Driver 2017 Dataset: Jonathan
	15_0417_124341 clean pulse 3.7 pN	3.67756	0.0891574	34.4121	0.105	11.667	0.23	Driver 2017 Dataset: Jonathan
	15_0417_124511 clear pulse 6.1 pN	6.06979	0.111503	25.1764	0.105	-2.694	0.23	Driver 2017 Dataset: Jonathan
	15_0417_124914 clear pulse 5.9 pN	5.91657	0.125492	26.036	0.105	8.10299	0.23	Driver 2017 Dataset: Jonathan
	15_0417_125144 tiny clear pulse 8.1 pN	8.08665	0.181048	10.1264	0.045	-2.38013	0.23	Driver 2017 Dataset: Jonathan
	15_0417_125602 small slow pulse possible illustrator 8.1 pN	8.0742	0.0738357	12.0031	0.345	-0.569449	0.23	Driver 2017 Dataset: Jonathan
	15_0417_125730 tiny pulse possible poster 9.4 pN	9.4304	0.077582	23.9043	0.245	-4.60586	0.23	Driver 2017 Dataset: Jonathan
	15_0416_010337 clear pulse 5.8 pN	5.81236	0.131311	21.3006	0.105	6.50268	0.1053	Driver 2017 Dataset: Jonathan
	15_0416_010842 nice pulse 6 pN	5.97624	0.0490219	30.6366	0.085	-2.24674	0.1053	Driver 2017 Dataset: Jonathan
	15_0416_011053 poster pulse 5.8 pN	5.80086	0.0650665	40.2955	0.125	18.3005	0.1053	Driver 2017 Dataset: Jonathan
	15_0416_011439 pulse but drift 3.2 pN	3.22387	0.0484684	24.5419	0.065	8.65235	0.1053	Driver 2017 Dataset: Jonathan
	15_0416_011558 big clear pulse 2 pN	1.99984	0.0643497	49.2067	0.085	25.4372	0.1053	Driver 2017 Dataset: Jonathan
	15_0416_012322 clear pulse 7.7 pN	7.71063	0.0390643	29.7479	0.165	-1.54451	0.1053	Driver 2017 Dataset: Jonathan
	15_0416_012630 tiny sharp pulse 7.2 pN	7.17107	0.0759217	21.4587	0.045	19.308	0.1053	Driver 2017 Dataset: Jonathan
	15_0416_012959 small pulse 7.4 pN	7.44125	0.0492266	20.7819	0.145	14.5149	0.1053	Driver 2017 Dataset: Jonathan
	15_0416_013348 good pulse 8.2 pN	8.17896	0.0563865	30.797	0.145	-1.43122	0.1053	Driver 2017 Dataset: Jonathan
	15_0416_013522 tiny pulse 9.3 pN	9.32089	0.0516017	14.6064	0.105	7.38231	0.1053	Driver 2017 Dataset: Jonathan
	15_0416_013730 short sharp pulse 10 pN	10.082	0.0343721	15.6655	0.065	-0.110595	0.1053	Driver 2017 Dataset: Jonathan
	15_0416_014445 tiny pulse 9.8 pN	9.75322	0.0423315	14.296	0.025	-1.27656	0.1053	Driver 2017 Dataset: Jonathan
	15_0416_014818 large pulse 0.9 pN	0.910262	0.0309784	86.4546	0.125	6.20509	0.0174	Driver 2017 Dataset: Jonathan
	15_0416_124826 modest pulse 4.2 pN	4.17804	0.0724249	35.6041	0.145	-5.78317	0.1053	Driver 2017 Dataset: Jonathan
	15_0416_125131 pulse 4.1 pN	4.1507	0.072708	34.7391	0.085	-11.7652	0.1053	Driver 2017 Dataset: Jonathan
	15_0416_125626 nice poster pulse 6 pN	6.06789	0.0598786	46.3745	0.16	20.4826	0.1053	Driver 2017 Dataset: Jonathan
	15_0415_045445 good pulse 3.1 pN	3.07524	0.0868261	26.2762	0.205	28.7902	0.1053	Driver 2017 Dataset: Jonathan
	15_0415_045715 tiny pulse 7.3 pN	7.31414	0.0743501	14.1407	0.065	-8.98974	0.1053	Driver 2017 Dataset: Jonathan
	15_0415_050514 nice sharp pulse 8.1 pN	8.0989	0.0980129	22.1051	0.085	-5.35442	0.1053	Driver 2017 Dataset: Jonathan
	15_0415_051245 pulse after fallback 2.8 pN	2.83253	0.0719342	-3.99355	0.025	-3.01328	0.1053	Driver 2017 Dataset: Jonathan
	15_0415_051511 very sharp pulse 2.3 pN	2.34235	0.0723147	45.2644	0.065	-2.54652	0.1053	Driver 2017 Dataset: Jonathan
	15_0415_052003 decent pulse 3.9 pN	3.921	0.0632724	37.4316	0.105	-4.37023	0.1053	Driver 2017 Dataset: Jonathan
	15_0415_052700 modest pulse 5.2 pN	5.19612	0.0559655	35.8102	0.125	-1.36324	0.1053	Driver 2017 Dataset: Jonathan
	15_0414_042841 pulse after partial fallback 3.1 pN	3.13541	0.0851771	6.49228	0.105	18.8277	0.1053	Driver 2017 Dataset: Jonathan
	15_0414_043127 big double pulse 3 pN	3.02008	0.0406812	46.8207	0.065	-16.0993	0.1053	Driver 2017 Dataset: Jonathan
	15_0414_043450 big clear pulse poster 4 pN	4.00115	0.0947678	39.5472	0.065	2.22709	0.1053	Driver 2017 Dataset: Jonathan
	15_0414_043841 no pulse 4.4 pN	4.36686	0.0829779	11.8345	0.105	3.25795	0.1053	Driver 2017 Dataset: Jonathan
	15_0414_050048 good pulse 6.5 pN	6.51225	0.0979515	34.8329	0.105	2.50268	0.1053	Driver 2017 Dataset: Jonathan
	15_0414_050735 no pulse 6.6 pN	6.65247	0.0651101	8.46468	0.145	-9.69948	0.1053	Driver 2017 Dataset: Jonathan
	15_0414_051250 maybe tiny pulse 5.8 pN	5.83087	0.125926	18.3517	0.025	-1.60852	0.1053	Driver 2017 Dataset: Jonathan
	15_0204_041704 very tiny pulse 5 pN	5.03474	0.097301	18.0321	0.065	-4.16861	0.1053	Driver 2017 Dataset: Chip
	15_0204_041910 pulse weird stuff after 3.8 pN	3.76083	0.0783618	34.8386	0.105	18.6222	0.1053	Driver 2017 Dataset: Chip
	15_0204_042416 not clear 4.6 pN	4.61286	0.0635948	26.1148	0.085	-2.97092	0.1053	Driver 2017 Dataset: Chip
	15_0204_043323 good 4.5 pN	4.48277	0.0799475	51.1016	0.105	-11.8212	0.1053	Driver 2017 Dataset: Chip
	15_0204_044148 nice 4.1 pN	4.06383	0.0651471	52.0432	0.165	-16.8147	0.1053	Driver 2017 Dataset: Chip
	15_0204_044502 good pulse 4.1 pN	4.15032	0.0820757	46.9738	0.105	-0.0978356	0.1053	Driver 2017 Dataset: Chip
	15_0204_045055 tiny wave 3.9 pN	3.93574	0.0711021	17.2245	0.065	-11.2865	0.1053	Driver 2017 Dataset: Chip
	15_0204_045541 not clear 4.2 pN	4.16422	0.108549	21.0382	0.145	-0.928832	0.1053	Driver 2017 Dataset: Chip
	15_0204_045755 good pulse 4.2 pN	4.18827	0.117984	45.05	0.12	-5.36932	0.1053	Driver 2017 Dataset: Chip
	15_0204_050302 poster sharp 4 pN	3.95438	0.102393	62.7	0.185	1.87217	0.1053	Driver 2017 Dataset: Chip
	15_0204_051752 clear pulse 4.2 pN	4.16136	0.0875178	59.0227	0.185	-0.911906	0.1053	Driver 2017 Dataset: Chip
	15_0204_052104 nice pulse 4 pN	3.95537	0.080851	56.8785	0.105	-4.9345	0.1053	Driver 2017 Dataset: Chip
	15_0204_052304 sharp pulse 3.9 pN	3.89399	0.141515	43.4104	0.065	-9.37146	0.1053	Driver 2017 Dataset: Chip
	15_0204_052459 nice sharp pulse 3.8 pN	3.8361	0.0597293	44.1134	0.065	-4.43735	0.1053	Driver 2017 Dataset: Chip
	15_0204_053704 no clear pulse here 3.7 pN	3.65722	0.0904483	31.8572	0.105	0.421016	0.1053	Driver 2017 Dataset: Chip
	15_0204_054836 nice pulse 3.7 pN	3.6633	0.0698783	41.4244	0.065	-7.31817	0.1053	Driver 2017 Dataset: Chip
