# Supplementary material for: Working strokes produced by curling protofilaments at disassembling microtubule tips can be biochemically tuned and vary with species
Source: eLife. 2022 Dec 29;11:e83225. doi: 10.7554/eLife.83225 (PMC9799970; doi:10.7554/eLife.83225)
Supplement: Figure 5—source data 4. — These source data are provided in an excel spreadsheet. [file elife-83225-fig5-data4.xlsx]

## Sheet: Pulse amps (bovine+subtlsn+Mg)
Date	Filename	Mean Force (pN)	Error Mean Force (pN)	Amplitude (nm)	Baseline Noise σ (nm)	Risetime (s)	Pulling Angle (deg.)	Spring Constant (pN/nm)	Sample Note	Evaluation Comment	[Mg2+]	Wave Quality	Detachment?	Treatment time (min)
2021-Sep-29	21_0929_044530	2.895	0.017463	7.7055	4.584	0.85	178.73	0.0347		Bead #1: Pre-loaded with 3 pN. 1 mM Mg2+, Observed dissassembly, detachment.	1	0	1	5
2021-Sep-29	21_0929_044920	2.8707	0.01394	18.358	3.8266	0.18	178.6	0.0347		Bead #2: Pre-loaded with 3 pN. 1 mM Mg2+, Observed dissassembly, detachment.	1	1	1	5
2021-Sep-29	21_0929_045122	2.9968	0.0094223	5.3964	2.3364	0.105	-179.41	0.0347		Bead #3: Pre-loaded with 3 pN. 1 mM Mg2+, Observed dissassembly, detachment.	1	0	1	5
2021-Sep-29	21_0929_045353	2.864	0.019243	4.0407	3.1605	0.18	-177.8	0.0347		Bead #4: Pre-loaded with 3 pN. 1 mM Mg2+, Observed dissassembly, detachment. S-tubulin 15 µM	1	0	1	5
2021-Sep-29	21_0929_045617	2.7852	0.048337	45.917	11.196	0.28	177.6	0.0347		Bead #5: Pre-loaded with 3 pN. 1 mM Mg2+, Observed dissassembly, detachment. S-tubulin 15 µM	1	1	1	5
2021-Sep-29	21_0929_045807	NaN	NaN	NaN	5.1899	NaN	NaN	0.0347		Bead #5: Pre-loaded with 3 pN. 1 mM Mg2+, Observed dissassembly, NO detachment; likely multiple MT's. S-tubulin 15 µm	1	0	0	5
2021-Sep-29	21_0929_045926	2.9106	0.0081722	11.031	2.1012	0.1	-176.99	0.0347		Bead #6: Pre-loaded with 3 pN. 1 mM Mg2+, Observed dissassembly, detachment. S-tubulin 15 µM	1	1	1	5
2021-Sep-29	21_0929_050006	2.8522	0.013212	11.202	3.4135	0.085	179.78	0.0347		Bead #7: Pre-loaded with 3 pN. 1 mM Mg2+, Observed dissassembly, NO detachment; likely multiple MT's. S-tubulin 15 µM	1	1	1	5
2021-Sep-29	21_0929_050531	2.891	0.023814	11.931	3.4884	0.26	-176.05	0.0347		Bead #8: Pre-loaded with 3 pN. 1 mM Mg2+, Observed dissassembly, NO detachment; likely multiple MT's. S-tubulin 15 µM	1	1	1	5
2021-Sep-29	21_0929_050824	NaN	NaN	NaN	3.1841	NaN	NaN	0.0347		Bead #8: Pre-loaded with 3 pN. 1 mM Mg2+, Observed dissassembly,no detachment. S-tubulin 15 µM	1	0	0	5
2021-Sep-29	21_0929_051118	NaN	NaN	NaN	4.0506	NaN	NaN	0.0347		Bead #9: Pre-loaded with 3 pN. 1 mM Mg2+, Observed dissassembly,no detachment. S-tubulin 15 µM	1	0	0	5
2021-Sep-29	21_0929_051322	NaN	NaN	NaN	4.7896	NaN	NaN	0.0347		Bead #10: Pre-loaded with 3 pN. 1 mM Mg2+, NO dissassembly, no detachment. S-tubulin 15 µM	1	0	0	5
2021-Sep-29	21_0929_052637	2.9969	0.014327	25.591	2.2287	0.165	-6.113	0.0347	stunning wave	Bead #11: Pre-loaded with 3 pN. 1 mM Mg2+, observed dissassembly, detachment. S-tubulin 15 µM	1	1	1	5
2021-Sep-29	21_0929_052925	NaN	NaN	NaN	3.8902	NaN	NaN	0.0347		Bead #12: Pre-loaded with 3 pN. 1 mM Mg2+, observed dissassembly, no detachment. S-tubulin 15 µM	1	0	0	5
2021-Sep-30	21_0930_035526	1.9157	0.018821	22.424	3.8653	0.285	-179.72	0.0347		Bead #1: Pre-loaded with 2 pN. 12 mM Mg2+, Observed dissassembly, detachment.	20	1	1	5
2021-Sep-30	21_0930_040146	1.8187	0.018358	16.058	6.3019	0.075	-171.61	0.0347		Bead #2: Pre-loaded with 2 pN. 12 mM Mg2+, Observed dissassembly, detachment.	20	0	1	5
2021-Sep-30	21_0930_040146	1.8155	0.018506	19.286	4.3543	0.065	-173.52	0.0347		Bead #2: Pre-loaded with 2 pN. 12 mM Mg2+, Observed dissassembly, detachment.	20	1	1	5
2021-Sep-30	21_0930_040243	1.7369	0.018084	30.888	5.4571	0.12	-173.14	0.0347		Bead #3: Pre-loaded with 2 pN. 12 mM Mg2+, Observed dissassembly, detachment.	20	1	1	5
2021-Sep-30	21_0930_040329	2.1269	0.015414	20.422	4.1383	0.06	6.2367	0.0347		Bead #4: Pre-loaded with 2 pN. 12 mM Mg2+, Observed dissassembly, detachment.	20	1	1	5
2021-Sep-30	21_0930_040645	1.7916	0.016629	17.294	2.9165	0.28	-176.55	0.0347		Bead #5: Pre-loaded with 2 pN. 12 mM Mg2+, Observed dissassembly, detachment.	20	1	1	5
2021-Sep-30	21_0930_040853	1.7199	0.015164	58.599	2.4283	0.335	179.43	0.0347		Bead #6: Pre-loaded with 2 pN. 20 mM Mg2+, Observed dissassembly, detachment.	20	1	1	5
2021-Sep-30	21_0930_041440	1.9232	0.022905	31.044	3.1063	0.285	177.92	0.0347		Bead #7: Pre-loaded with 2 pN. 12 mM Mg2+, Observed dissassembly, detachment.	20	1	1	5
2021-Sep-30	21_0930_041621	1.882	0.016384	12.769	2.9099	0.285	178.13	0.0347		Bead #8: Pre-loaded with 2 pN. 12 mM Mg2+, Observed dissassembly, detachment.	20	1	1	5
2021-Sep-30	21_0930_042458	1.8309	0.027394	42.142	3.3988	0.265	177.6	0.0347		Bead #9: Pre-loaded with 2 pN. 12 mM Mg2+, Observed dissassembly, detachment.	20	1	1	5
2021-Sep-30	21_0930_042645	1.9567	0.017225	52.453	4.2377	0.415	179.57	0.0347		Bead #10: Pre-loaded with 2 pN. 12 mM Mg2+, Observed dissassembly, detachment.	20	1	1	5
2021-Sep-30	21_0930_042757	1.8851	0.014745	23.726	2.7886	0.245	176.79	0.0347		Bead #11: Pre-loaded with 2 pN. 12 mM Mg2+, Observed dissassembly, detachment.	20	1	1	5
2021-Sep-30	21_0930_043009	2.074	0.017223	35.27	2.4988	0.205	-2.1214	0.0347		Bead #12: Pre-loaded with 2 pN. 12 mM Mg2+, Observed dissassembly, detachment.	20	1	1	5
2021-Sep-30	21_0930_043757	1.764	0.028329	33.156	9.0764	0.275	-173.92	0.0347		Bead #13: Pre-loaded with 2 pN. 12 mM Mg2+, Observed dissassembly, detachment.	20	1	1	5
2021-Nov-03	21_1103_110038	1.7356	0.02473	9.5573	2.5684	0.12	171.42	0.0347		Bead #1: Pre-loaded with 2 pN. 1 mM Mg2+, Observed dissassembly, detachment.	1	1	1	7.5
2021-Nov-03	21_1103_110355	NaN	NaN	NaN	2.9413	NaN	NaN	0.0347		Bead #2: Pre-loaded with 2 pN. 1 mM Mg2+, 7.5m sTub 12 µM, Observed dissassembly, no detachment.	1	0	0	7.5
2021-Nov-03	21_1103_110659	NaN	NaN	NaN	2.811	NaN	NaN	0.0347		Bead #3: Pre-loaded with 2 pN. 1 mM Mg2+, 7.5m sTub 12 µM, Observed dissassembly, no detachment.	1	0	0	7.5
2021-Nov-03	21_1103_111345	1.783	0.017389	38.75	3.5793	0.38	-178.21	0.0347	Weird wave.	Bead #4: Pre-loaded with 2 pN. 20 mM Mg2+, 7.5m sTub 20 µM, Observed dissassembly, no detachment.	20	1	1	7.5
2021-Nov-03	21_1103_111644	1.7024	0.010645	17.79	3.632	0.16	-103.76	0.0347		Bead #5: Pre-loaded with 2 pN. 20 mM Mg2+, 7.5m sTub 20 µM, Observed dissassembly, no detachment.	20	1	1	7.5
2021-Nov-03	21_1103_112434	NaN	NaN	NaN	3.9525	NaN	NaN	0.0347		Bead #6: Pre-loaded with 2 pN. 20 mM Mg2+, 7.5m sTub 20 µM, Observed dissassembly, no detachment.	20	0	0	7.5
2021-Nov-03	21_1103_112751	1.8869	0.017029	54.009	2.7662	0.15	-179.77	0.0347	WOW	Bead #7: Pre-loaded with 2 pN. 20 mM Mg2+, 7.5m sTub 20 µM, Observed dissassembly, detachment.	20	1	1	7.5
2021-Nov-04	21_1104_021517	1.7455	0.011146	13.771	2.1379	0.19	-177.54	0.0347		Bead #1: Pre-loaded with 2 pN. 1 mM Mg2+, Observed dissassembly, detachment.	1	1	1	7.5
2021-Nov-04	21_1104_021731	1.8127	0.017971	14.214	5.3734	0.43	-178.62	0.0347		Bead #2: Pre-loaded with 2 pN. 1 mM Mg2+, Observed dissassembly, detachment.	1	0	1	7.5
2021-Nov-04	21_1104_021833	NaN	NaN	NaN	NaN	NaN	NaN	0.0347		Bead #3: Pre-loaded with 2 pN. 1 mM Mg2+, Observed dissassembly, no detachment.	1	0	0	7.5
2021-Nov-04	21_1104_022146	1.8416	0.022538	17.721	7.3061	0.21	179.59	0.0347		Bead #4: Pre-loaded with 2 pN. 1 mM Mg2+, Observed dissassembly, detachment.	1	0	1	7.5
2021-Nov-04	21_1104_022314	1.7733	0.019487	20.673	2.9417	0.23	179.89	0.0347		Bead #5: Pre-loaded with 2 pN. 1 mM Mg2+, Observed dissassembly, detachment.	1	1	1	7.5
2021-Nov-04	21_1104_022459	NaN	NaN	NaN	NaN	NaN	NaN	0.0347		Bead #6: Pre-loaded with 2 pN. 20 mM Mg2+, Observed no dissassembly, no detachment.	20	0	0	7.5
2021-Nov-04	21_1104_022748	1.8645	0.031635	15.495	8.8875	0.54	-175.45	0.0347		Bead #7: Pre-loaded with 2 pN. 1 mM Mg2+, Observed dissassembly, detachment.	1	0	0	7.5
2021-Nov-04	21_1104_023819	2.017	0.018935	14.735	3.2385	0.175	1.7423	0.0347		Bead #8: Pre-loaded with 2 pN. 1 mM Mg2+, Observed dissassembly, detachment.	1	1	1	7.5
2021-Nov-04	21_1104_023958	NaN	NaN	NaN	NaN	NaN	NaN	0.0347		Bead #9: Pre-loaded with 2 pN. 1 mM Mg2+, Observed dissassembly, no detachment.	1	0	0	7.5
2021-Nov-04	21_1104_024236	1.7262	0.018863	13.623	3.325	0.285	-179	0.0347		Bead #10: Pre-loaded with 2 pN. 1 mM Mg2+, Observed dissassembly, detachment.	1	1	1	7.5
2021-Nov-04	21_1104_024521	1.8478	0.031866	18.377	9.957	0.48	176.43	0.0347		Bead #11: Pre-loaded with 2 pN. 1 mM Mg2+, Observed dissassembly, detachment.	1	0	1	7.5
2021-Nov-04	21_1104_024622	1.8664	0.01661	21.546	3.6023	0.24	-177.48	0.0347		Bead #12: Pre-loaded with 2 pN. 1 mM Mg2+, Observed dissassembly, detachment.	1	1	1	7.5
2021-Nov-04	21_1104_024747	NaN	NaN	NaN	NaN	NaN	NaN	0.0347		Bead #12: Pre-loaded with 2 pN. 1 mM Mg2+, Observed no dissassembly, no detachment.	1	0	0	7.5
2021-Nov-04	21_1104_024953	NaN	NaN	NaN	NaN	NaN	NaN	0.0347		Bead #13: Pre-loaded with 2 pN. 1 mM Mg2+, Observed no dissassembly, no detachment.	1	0	0	7.5
2021-Nov-04	21_1104_025116	1.7598	0.028545	21.071	3.8954	0.06	177.56	0.0347		Bead #14: Pre-loaded with 2 pN. 1 mM Mg2+, Observed dissassembly, detachment.	1	1	1	7.5
2021-Nov-04	21_1104_025236	2.1374	0.017386	12.673	2.5698	0.15	-1.6071	0.0347		Bead #15: Pre-loaded with 2 pN. 1 mM Mg2+, Observed dissassembly, detachment.	1	1	1	7.5
2021-Nov-04	21_1104_025348	1.8147	0.028308	25.568	5.5198	0.52	-168.6	0.0347		Bead #16: Pre-loaded with 2 pN. 1 mM Mg2+, Observed dissassembly, detachment.	1	1	1	7.5
2021-Nov-04	21_1104_025456	1.9681	0.022657	4.774	4.6519	0.14	175.41	0.0347		Bead #17: Pre-loaded with 2 pN. 1 mM Mg2+, Observed dissassembly, detachment.	1	0	1	7.5
2021-Nov-04	21_1104_025736	1.8876	0.014554	14.194	2.5394	0.06	-176.96	0.0347		Bead #18: Pre-loaded with 2 pN. 1 mM Mg2+, Observed dissassembly, detachment.	1	1	1	7.5
2021-Nov-04	21_1104_025939	1.8254	0.017684	24.117	4.2468	0.395	-174.83	0.0347		Bead #19: Pre-loaded with 2 pN. 1 mM Mg2+, Observed dissassembly, detachment.	1	1	1	7.5
2021-Nov-04	21_1104_030200	NaN	NaN	NaN	NaN	NaN	NaN	0.0347		Bead #20: Pre-loaded with 2 pN. 1 mM Mg2+, Observed dissassembly, no detachment.	1	0	0	7.5
2021-Nov-04	21_1104_030639	1.8001	0.026712	31.557	5.8584	0.345	171.85	0.0347		Bead #21: Pre-loaded with 2 pN. 1 mM Mg2+, Observed dissassembly, no detachment.	1	1	1	7.5
2021-Nov-08	21_1108_033613	1.8631	0.013558	4.9156	3.9853	0.56	179.34	0.0347		Bead #1: Pre-loaded with 2 pN. 1 mM Mg2+, Observed dissassembly, detachment.	1	0	1	7.5
2021-Nov-08	21_1108_033732	1.8163	0.013304	12.505	3.2894	0.315	-174.21	0.0347		Bead #2: Pre-loaded with 2 pN. 1 mM Mg2+, Observed dissassembly, detachment.	1	1	1	7.5
2021-Nov-08	21_1108_033850	2.0113	0.018014	12.719	3.4401	0.16	-5.3356	0.0347		Bead #3: Pre-loaded with 2 pN. 1 mM Mg2+, Observed dissassembly, detachment.	1	1	1	7.5
2021-Nov-08	21_1108_033925	1.9466	0.015853	7.7712	2.2221	0.3	173.35	0.0347		Bead #4: Pre-loaded with 2 pN. 1 mM Mg2+, Observed dissassembly, detachment.	1	1	1	7.5
2021-Nov-08	21_1108_034000	1.9894	0.012724	16.482	2.7983	0.295	-1.6164	0.0347		Bead #5: Pre-loaded with 2 pN. 1 mM Mg2+, Observed dissassembly, detachment.	1	1	1	7.5
2021-Nov-08	21_1108_034200	2.025	0.014432	37.467	3.7103	0.42	-6.5687	0.0347		Bead #6: Pre-loaded with 2 pN. 20 mM Mg2+, Observed dissassembly, detachment.	20	1	1	7.5
2021-Nov-08	21_1108_035721	1.557	0.035295	23.6	10.377	1.94	-176.73	0.0347		Bead #7: Pre-loaded with 2 pN. 1 mM Mg2+, Observed dissassembly, detachment.	1	0	1	7.5
2021-Nov-08	21_1108_035831	NaN	NaN	NaN	NaN	NaN	NaN	0.0347		Bead #7: Pre-loaded with 2 pN. 1 mM Mg2+, Observed no dissassembly, no detachment.	1	0	0	7.5
2021-Nov-08	21_1108_040224	1.9164	0.01347	6.2009	3.2264	1.1	-178.8	0.0347		Bead #8: Pre-loaded with 2 pN. 1 mM Mg2+, Observed dissassembly, detachment.	1	0	1	7.5
2021-Nov-08	21_1108_040421	NaN	NaN	NaN	NaN	NaN	NaN	0.0347		Bead #9: Pre-loaded with 2 pN. 1 mM Mg2+, Observed no dissassembly, no detachment.	1	0	0	7.5
2021-Nov-08	21_1108_040724	1.8853	0.013665	30.221	3.1375	0.115	179.73	0.0347		Bead #10: Pre-loaded with 2 pN. 1 mM Mg2+, Observed dissassembly, detachment.	1	1	1	7.5
2021-Nov-08	21_1108_040846	1.875	0.026981	10.999	4.9347	1.42	-179.57	0.0347		Bead #11: Pre-loaded with 2 pN. 1 mM Mg2+, Observed dissassembly, detachment.	1	0	1	7.5
2021-Nov-08	21_1108_040947	NaN	NaN	NaN	NaN	NaN	NaN	0.0347		Bead #11: Pre-loaded with 2 pN. 1 mM Mg2+, Observed dissassembly, detachment.	1	0	0	7.5
2021-Nov-08	21_1108_041212	1.9337	0.014111	7.3766	2.1146	0.06	177.49	0.0347		Bead #13: Pre-loaded with 2 pN. 1 mM Mg2+, Observed dissassembly, detachment.	1	0	1	7.5
2021-Nov-08	21_1108_041819	2.1128	0.013991	14.821	5.0875	0.465	-6.708	0.0347		Bead #14: Pre-loaded with 2 pN. 1 mM Mg2+, Observed dissassembly, detachment.	1	0	1	7.5
2022-Jan-19	22_0119_073851	NaN	NaN	NaN	NaN	NaN	NaN	0.0347		Bead #1: Pre-loaded with 2 pN. 1 mM Mg2+, 12 µM sTub, Observed no disassembly.	20	0	0	10
2022-Jan-19	22_0119_074059	2.1269	0.019085	17.973	3.5034	0.32	-178.69	0.0347		Bead #2: Pre-loaded with 2 pN. 1 mM Mg2+, 12 µM sTub, Observed disassembly and detachment.	20	1	1	10
2022-Jan-19	22_0119_074155	1.7315	0.018183	30.735	4.8183	0.94	177.53	0.0347		Bead #3: Pre-loaded with 2 pN. 1 mM Mg2+, 12 µM sTub, Observed disassembly and detachment.	20	1	1	10
2022-Jan-19	22_0119_074318	1.8535	0.019536	11.858	4.2864	0.12	174.71	0.0347		Bead #4: Pre-loaded with 2 pN. 1 mM Mg2+, 12 µM sTub, Observed disassembly and detachment.	20	0	1	10
2022-Jan-19	22_0119_074408	NaN	NaN	NaN	NaN	NaN	NaN	0.0347		Bead #5: Pre-loaded with 2 pN. 1 mM Mg2+, 12 µM sTub, Observed disassembly and wave, but forward rock with no detachment.	20	0	0	10
2022-Jan-19	22_0119_074529	2.0832	0.021	-2.7698	9.5834	0	-8.5442	0.0347		Bead #6: Pre-loaded with 2 pN. 20 mM Mg2+, 20 µM sTub, Observed disassembly and wave, but forward rock with no detachment.	20	0	1	10
2022-Jan-19	22_0119_074638	NaN	NaN	NaN	NaN	NaN	NaN	0.0347		Bead #7: Pre-loaded with 2 pN. 20 mM Mg2+, 20 µM sTub, Observed disassembly but no detachment.	20	0	0	10
2022-Jan-19	22_0119_075429	NaN	NaN	NaN	NaN	NaN	NaN	0.0347		Bead #7: Pre-loaded with 2 pN. 20 mM Mg2+, 20 µM sTub, Observed disassembly but no detachment.	20	0	0	10
2022-Jan-19	22_0119_075646	NaN	NaN	NaN	NaN	NaN	NaN	0.0347		Bead #8: Pre-loaded with 2 pN. 20 mM Mg2+, 20 µM sTub, Observed disassembly but no detachment.	20	0	0	10
2022-Jan-19	22_0119_075822	2.0319	0.01999	2.0861	10.058	0.42	-7.3901	0.0347		Bead #9: Pre-loaded with 2 pN. 20 mM Mg2+, 20 µM sTub, Observed disassembly weird detachment.	20	1	1	10
2022-Jan-19	22_0119_080148	1.8569	0.017006	39.796	6.5439	1.025	-176.31	0.0347		Bead #10: Pre-loaded with 2 pN. 20 mM Mg2+, 20 µM sTub, Observed disassembly and detachment.	20	1	1	10
2022-Jan-19	22_0119_081744	NaN	NaN	NaN	NaN	NaN	NaN	0.0347		Bead #11: Pre-loaded with 2 pN. 1 mM Mg2+, 12 µM sTub, Observed no disassembly	20	0	0	10
2022-Jan-19	22_0119_082123	NaN	NaN	NaN	NaN	NaN	NaN	0.0347		Bead #11: Pre-loaded with 2 pN. 1 mM Mg2+, 12 µM sTub, Observed no disassembly	20	0	0	10
2022-Jan-19	22_0119_082313	1.8852	0.019185	5.7092	5.0504	0.41	-179.55	0.0347		Bead #12: Pre-loaded with 2 pN. 1 mM Mg2+, 12 µM sTub, Observed disassembly and detachment.	20	0	0	10
2022-Jan-19	22_0119_082521	NaN	NaN	NaN	NaN	NaN	NaN	0.0347		Bead #13: Pre-loaded with 2 pN. 1 mM Mg2+, 12 µM sTub, Observed no disassembly.	20	0	0	10
2022-Jan-19	22_0119_082611	NaN	NaN	NaN	NaN	NaN	NaN	0.0347		Bead #14: Pre-loaded with 2 pN. 1 mM Mg2+, 12 µM sTub, Observed no disassembly.	20	0	0	10
2022-Jan-20	22_0120_083915	1.6236	0.042901	26.867	8.7307	0.12	-170.78	0.0347		Bead #1: Pre-loaded with 2 pN. 20 mM Mg2+, 17 µM sTub, Observed disassembly and detachment.	20	0	0	10
2022-Jan-20	22_0120_084818	1.803	0.028994	56.849	8.0739	0.415	174.47	0.0347		Bead #2: Pre-loaded with 2 pN. 20 mM Mg2+, 17 µM sTub, Observed disassembly and detachment.	20	1	1	10	also large wave
2022-Jan-20	22_0120_085342	1.8291	0.023434	68.452	2.7904	0.26	-175.13	0.0347		Bead #3: Pre-loaded with 2 pN. 20 mM Mg2+, 17 µM sTub, Observed disassembly and detachment.	20	1	1	10	massive wave
2022-Jan-20	22_0120_090012	1.9756	0.22105	61.66	6.3144	0.04	-0.54148	0.0347		Bead #4: Pre-loaded with 2 pN. 20 mM Mg2+, 17 µM sTub, Observed disassembly and detachment.	20	1	1	10
2022-Jan-20	22_0120_090217	1.87	0.0177	31.973	2.1642	0.18	-177.58	0.0347		Bead #5: Pre-loaded with 2 pN. 20 mM Mg2+, 17 µM sTub, Observed disassembly and detachment.	20	1	1	10
2022-Jan-20	22_0120_090541	1.8399	0.015383	32.478	5.3919	0.295	166.58	0.0347		Bead #6: Pre-loaded with 2 pN. 20 mM Mg2+, 17 µM sTub, Observed disassembly and detachment.	20	1	1	10
2022-Feb-10	22_0210_053540	1.9112	0.018909	61.597	2.9275	0.28	179.2	0.0347		Bead #1: Pre-loaded with 2 pN. 20 mM Mg2+, 17 µM sTub, Observed disassembly and detachment.	20	1	1	10	massive wave
2022-Feb-10	22_0210_053945	1.8412	0.016692	42.884	3.0077	0.38	175.47	0.0347		Bead #2: Pre-loaded with 2 pN. 20 mM Mg2+, 17 µM sTub, Observed disassembly and detachment.	20	1	1	10
2022-Feb-10	22_0210_054119	NaN	NaN	NaN	NaN	NaN	NaN	0.0347		Bead #3: Pre-loaded with 2 pN. 20 mM Mg2+, 17 µM sTub, Observed no disassembly, no detachment. Probable bundle.	20	0	0	10
2022-Feb-10	22_0210_054351	2.1099	0.014399	42.954	5.1777	0.18	-18.763	0.0347		Bead #4: Pre-loaded with 2 pN. 20 mM Mg2+, 17 µM sTub, Observed disassembly and detachment.	20	1	1	10
2022-Feb-10	22_0210_054439	2.1099	0.014399	42.954	5.1777	0.18	-18.763	0.0347		Bead #5: Pre-loaded with 2 pN. 20 mM Mg2+, 17 µM sTub, Observed disassembly no detachment.	20	0	0	10
2022-Feb-10	22_0210_054811	1.9207	0.012503	45.786	4.2571	0.605	168.3	0.0347		Bead #6: Pre-loaded with 2 pN. 20 mM Mg2+, 17 µM sTub, Observed disassembly and detachment.	20	1	1	10
2022-Feb-10	22_0210_055241	1.85	0.012707	29.853	4.5503	0.375	-177.56	0.0347		Bead #7: Pre-loaded with 2 pN. 20 mM Mg2+, 17 µM sTub, Observed disassembly and detachment.	20	1	1	10
2022-Feb-10	22_0210_055456	1.8494	0.017443	28.225	3.9909	0.11	-178.99	0.0347		Bead #8: Pre-loaded with 2 pN. 20 mM Mg2+, 17 µM sTub, Observed disassembly and detachment.	20	1	1	10
2022-Feb-10	22_0210_055725	1.6779	0.016618	23.21	3.4873	0.105	-173.41	0.0347		Bead #9: Pre-loaded with 2 pN. 20 mM Mg2+, 17 µM sTub, Observed disassembly and detachment.	20	1	1	10
2022-Feb-10	22_0210_060430	1.4345	0.011427	64.514	1.776	1.405	177.93	0.0347		Bead #10: Pre-loaded with 2 pN. 20 mM Mg2+, 17 µM sTub, Observed disassembly and detachment.	20	1	1	10	WOW, massive wave, very pretty
2022-Feb-10	22_0210_061000	NaN	NaN	NaN	NaN	NaN	NaN	0.0347		Bead #12: Pre-loaded with 2 pN. 20 mM Mg2+, 17 µM sTub, Observed disassembly no detachment.	20	0	0	10
2022-Feb-10	22_0210_061215	1.1965	0.070475	12.318	2.4257	0.54	179.39	0.0347		Bead #13: Pre-loaded with 2 pN. 20 mM Mg2+, 17 µM sTub, Observed disassembly no detachment.	20	1	1	10

## Sheet: Dsmbly spds (bovine+subtlsn+Mg)
Date	Filename	Disassembly or Assembly?	Speed (px/frame)	Speed (nm/s)	speed (µm/min)	[Mg2+] (mM)	[sTub] (µM)	Cleavage time (min)
2021-09-16	2021-Sep-16_Stub_Growth+12mMMg_FOV2.avi.mdf	disassembly	597.44	996.73	59.8038	12		5
2021-09-16	2021-Sep-16_Stub_Growth+12mMMg_FOV2.avi.mdf	disassembly	341.88	570.37	34.2222	12		5
2021-09-16	2021-Sep-16_Stub_Growth+12mMMg_FOV2.avi.mdf	disassembly	433.39	723.04	43.3824	12		5
2021-09-16	2021-Sep-16_Stub_Growth+12mMMg_FOV2.avi.mdf	disassembly	471.48	786.587	47.1952	12		5
2021-09-16	2021-Sep-16_Stub_Growth+12mMMg_FOV2.avi.mdf	disassembly	459.54	766.667	46	12		5
2021-09-27	2021-Sep-27_LMurray_S-Tub15uM_6mMMg.avi.mdf	disassembly	362.99	605.589	36.3353	6		5
2021-09-27	2021-Sep-27_LMurray_S-Tub15uM_6mMMg.avi.mdf	disassembly	443.99	740.724	44.4434	6		5
2021-09-27	2021-Sep-27_LMurray_S-Tub15uM_6mMMg.avi.mdf	disassembly	297.51	496.346	29.7808	6		5
2021-09-27	2021-Sep-27_LMurray_S-Tub15uM_6mMMg.avi.mdf	disassembly	379.78	633.6	38.016	6		5
2021-09-27	2021-Sep-27_LMurray_S-Tub15uM_6mMMg.avi.mdf	disassembly	434.22	724.424	43.4655	6		5
2021-09-27	2021-Sep-27_LMurray_S-Tub15uM_6mMMg.avi.mdf	disassembly	474.75	792.042	47.5225	6		5
2021-09-27	2021-Sep-27_LMurray_S-Tub15uM_6mMMg.avi.mdf	disassembly	329.23	549.266	32.956	6		5
2021-09-27	2021-Sep-27_LMurray_S-Tub15uM_6mMMg.avi.mdf	disassembly	494.08	824.291	49.4575	6		5
2021-09-27	2021-Sep-27_LMurray_S-Tub15uM_6mMMg.avi.mdf	disassembly	366.48	611.411	36.6847	6		5
2021-09-14	2021-Sep-14_LMurray_S-Tub20uM_1mMMg.avi.mdf	disassembly	177.17	295.579	17.7347	1		5
2021-09-14	2021-Sep-14_LMurray_S-Tub20uM_1mMMg.avi.mdf	disassembly	161.95	270.187	16.2112	1		5
2021-09-14	2021-Sep-14_LMurray_S-Tub20uM_1mMMg.avi.mdf	disassembly	213.36	355.956	21.3574	1		5
2021-09-14	2021-Sep-14_LMurray_S-Tub20uM_1mMMg.avi.mdf	disassembly	146.39	244.228	14.6537	1		5
2021-09-14	2021-Sep-14_LMurray_S-Tub20uM_1mMMg.avi.mdf	disassembly	190.03	317.034	19.022	1		5
2021-09-14	2021-Sep-14_LMurray_S-Tub20uM_1mMMg.avi.mdf	disassembly	185	308.642	18.5185	1		5
2021-09-27	2021-Sep-27_LMurray_S-Tub15and20uM_20mMMg.avi.mdf	disassembly	346.49	578.061	34.6837	20		5
2021-09-27	2021-Sep-27_LMurray_S-Tub15and20uM_20mMMg.avi.mdf	disassembly	283.93	473.69	28.4214	20		5
2021-09-27	2021-Sep-27_LMurray_S-Tub15and20uM_20mMMg.avi.mdf	disassembly	304.35	507.758	30.4655	20		5
2021-09-27	2021-Sep-27_LMurray_S-Tub15and20uM_20mMMg.avi.mdf	disassembly	322.39	537.855	32.2713	20		5
2021-09-27	2021-Sep-27_LMurray_S-Tub15and20uM_20mMMg.avi.mdf	disassembly	327.82	546.914	32.8148	20		5
2021-09-27	2021-Sep-27_LMurray_S-Tub15and20uM_20mMMg.avi.mdf	disassembly	357.52	596.463	35.7878	20		5
2021-09-27	2021-Sep-27_LMurray_S-Tub15and20uM_20mMMg.avi.mdf	disassembly	343.62	573.273	34.3964	20		5
2021-09-27	2021-Sep-27_LMurray_S-Tub15and20uM_20mMMg.avi.mdf	disassembly	315.1	525.692	31.5415	20		5
2021-09-27	2021-Sep-27_LMurray_S-Tub15and20uM_20mMMg.avi.mdf	disassembly	308.96	515.449	30.9269	20		5
2021-09-27	2021-Sep-27_LMurray_S-Tub15and20uM_20mMMg.avi.mdf	disassembly	378.77	631.915	37.9149	20		5
2021-09-27	2021-Sep-27_LMurray_S-Tub15and20uM_20mMMg.avi.mdf	disassembly	323.36	539.473	32.3684	20		5
2021-09-27	2021-Sep-27_LMurray_S-Tub15and20uM_20mMMg.avi.mdf	disassembly	272.12	453.987	27.2392	20		5
2021-10-12	2021-Oct-12_LMurray_S-Tub30s17uM_1-12mMMg.avi.mdf	disassembly	242.83	405.122	24.3073	1	17	0.5
2021-10-12	2021-Oct-12_LMurray_S-Tub30s17uM_1-12mMMg.avi.mdf	disassembly	212.39	354.338	21.2603	1	17	0.5
2021-10-12	2021-Oct-12_LMurray_S-Tub30s17uM_1-12mMMg.avi.mdf	disassembly	299.33	499.383	29.963	1	17	0.5
2021-10-12	2021-Oct-12_LMurray_S-Tub30s17uM_1-12mMMg.avi.mdf	disassembly	282.54	471.371	28.2823	1	17	0.5
2021-10-12	2021-Oct-12_LMurray_S-Tub30s17uM_1-12mMMg.avi.mdf	disassembly	302.06	503.937	30.2362	1	17	0.5
2021-10-12	2021-Oct-12_LMurray_S-Tub30s17uM_1-12mMMg.avi.mdf	disassembly	133.24	222.289	13.3373	1	17	0.5
2021-10-12	2021-Oct-12_LMurray_S-Tub30s17uM_1-12mMMg.avi.mdf	disassembly	487.08	812.613	48.7568	1	17	0.5
2021-10-12	2021-Oct-12_LMurray_S-Tub30s17uM_1-12mMMg.avi.mdf	disassembly	363.76	606.874	36.4124	1	17	0.5
2021-10-12	2021-Oct-12_LMurray_S-Tub30s17uM_1-12mMMg.avi.mdf	disassembly	140.01	233.584	14.015	1	17	0.5
2021-10-12	2021-Oct-12_LMurray_S-Tub30s17uM_1-12mMMg.avi.mdf	disassembly	343.55	573.156	34.3894	1	17	0.5
2021-10-12	2021-Oct-12_LMurray_S-Tub30s17uM_1-12mMMg.avi.mdf	disassembly	302.01	503.854	30.2312	1	17	0.5
2021-10-12	2021-Oct-12_LMurray_S-Tub30s17uM_1-12mMMg.avi.mdf	disassembly	153.29	255.739	15.3443	1	17	0.5
2021-10-12	2021-Oct-12_LMurray_S-Tub30s17uM_1-12mMMg.avi.mdf	disassembly	234.03	390.44	23.4264	1	17	0.5
2021-10-12	2021-Oct-12_LMurray_S-Tub30s17uM_1-12mMMg.avi.mdf	disassembly	226.46	377.811	22.6687	1	17	0.5
2021-10-12	2021-Oct-12_LMurray_S-Tub30s17uM_1-12mMMg.avi.mdf	disassembly	210.06	350.45	21.027	1	17	0.5
2021-10-12	2021-Oct-12_LMurray_S-Tub30s17uM_1-12mMMg.avi.mdf	disassembly	224.42	374.408	22.4645	12	17	0.5
2021-10-12	2021-Oct-12_LMurray_S-Tub30s17uM_1-12mMMg.avi.mdf	disassembly	241.58	403.036	24.1822	12	17	0.5
2021-10-12	2021-Oct-12_LMurray_S-Tub30s17uM_1-12mMMg.avi.mdf	disassembly	572.74	955.522	57.3313	12	17	0.5
2021-10-12	2021-Oct-12_LMurray_S-Tub30s17uM_1-12mMMg.avi.mdf	disassembly	408.2	681.014	40.8609	12	17	0.5
2021-10-12	2021-Oct-12_LMurray_S-Tub30s17uM_1-12mMMg.avi.mdf	disassembly	526.99	879.196	52.7518	12	17	0.5
2021-10-12	2021-Oct-12_LMurray_S-Tub30s17uM_1-12mMMg.avi.mdf	disassembly	427.92	713.914	42.8348	12	17	0.5
2021-10-12	2021-Oct-12_LMurray_S-Tub30s17uM_1-12mMMg.avi.mdf	disassembly	535.97	894.178	53.6507	12	17	0.5
2021-10-12	2021-Oct-12_LMurray_S-Tub30s17uM_1-12mMMg.avi.mdf	disassembly	410.59	685.002	41.1001	12	17	0.5
2021-10-12	2021-Oct-12_LMurray_S-Tub30s17uM_1-12mMMg.avi.mdf	disassembly	579.32	966.5	57.99	12	17	0.5
2021-10-12	2021-Oct-12_LMurray_S-Tub30s17uM_1-12mMMg.avi.mdf	disassembly	509.95	850.767	51.046	12	17	0.5
2021-10-12	2021-Oct-12_LMurray_S-Tub30s17uM_1-12mMMg.avi.mdf	disassembly	413.67	690.14	41.4084	12	17	0.5
2021-10-12	2021-Oct-12_LMurray_S-Tub30s17uM_1-12mMMg.avi.mdf	disassembly	521.92	870.737	52.2442	12	17	0.5
2021-10-12	2021-Oct-12_LMurray_S-Tub30s17uM_1-12mMMg.avi.mdf	disassembly	748.39	1248.57	74.9139	12	17	0.5
2021-10-12	2021-Oct-12_LMurray_S-Tub30s17uM_1-12mMMg.avi.mdf	disassembly	594.15	991.241	59.4745	12	17	0.5
2021-10-12	2021-Oct-12_LMurray_S-Tub30s17uM_1-12mMMg.avi.mdf	disassembly	559.67	933.717	56.023	12	17	0.5
2021-10-12	2021-Oct-12_LMurray_S-Tub30s17uM_1-12mMMg.avi.mdf	disassembly	364.08	607.407	36.4444	12	17	0.5
2021-10-12	2021-Oct-12_LMurray_S-Tub30s17uM_1-12mMMg.avi.mdf	disassembly	397.89	663.814	39.8288	12	17	0.5
2021-10-12	2021-Oct-12_LMurray_S-Tub30s17uM_1-12mMMg.avi.mdf	disassembly	641.47	1070.19	64.2112	12	17	0.5
2021-10-12	2021-Oct-12_LMurray_S-Tub30s17uM_1-12mMMg.avi.mdf	disassembly	536.8	895.562	53.7337	12	17	0.5
2021-10-12	2021-Oct-12_LMurray_S-Tub30s17uM_1-12mMMg.avi.mdf	disassembly	457.66	763.53	45.8118	12	17	0.5
2021-10-12	2021-Oct-12_LMurray_S-Tub30s17uM_1-12mMMg.avi.mdf	disassembly	608.39	1015	60.8999	12	17	0.5
2021-10-12	2021-Oct-12_LMurray_S-Tub30s17uM_1-12mMMg.avi.mdf	disassembly	421.87	703.82	42.2292	12	17	0.5
2021-10-12	2021-Oct-12_LMurray_S-Tub30s17uM_1-12mMMg.avi.mdf	disassembly	759.62	1267.3	76.038	12	17	0.5
2021-10-12	2021-Oct-12_LMurray_S-Tub30s17uM_1-12mMMg.avi.mdf	disassembly	655.08	1092.89	65.5736	12	17	0.5
2021-10-12	2021-Oct-12_LMurray_S-Tub30s17uM_1-12mMMg.avi.mdf	disassembly	414.74	691.925	41.5155	12	17	0.5
2021-10-12	2021-Oct-12_LMurray_S-Tub30s17uM_1-12mMMg.avi.mdf	disassembly	480.79	802.119	48.1271	12	17	0.5
2021-10-12	2021-Oct-12_LMurray_S-Tub30s17uM_1-12mMMg.avi.mdf	disassembly	423.93	707.257	42.4354	12	17	0.5
2021-10-12	2021-Oct-12_LMurray_S-Tub30s17uM_1-12mMMg.avi.mdf	disassembly	547.27	913.03	54.7818	12	17	0.5
2021-10-12	2021-Oct-12_LMurray_S-Tub30s17uM_1-12mMMg.avi.mdf	disassembly	491.58	820.12	49.2072	12	17	0.5
2021-10-12	2021-Oct-12_LMurray_S-Tub30s17uM_1-12mMMg.avi.mdf	disassembly	455.84	760.494	45.6296	12	17	0.5
2021-10-12	2021-Oct-12_LMurray_S-Tub30s17uM_1-12mMMg.avi.mdf	disassembly	1011.5	1687.52	101.251	12	17	0.5
2021-10-12	2021-Oct-12_LMurray_S-Tub30s17uM_1-12mMMg.avi.mdf	disassembly	386.9	645.479	38.7287	12	17	0.5
2021-10-12	2021-Oct-12_LMurray_S-Tub20min15uM_1-12mMMg.avi	disassembly	188.27	314.097	18.8458	12	15	20
2021-10-12	2021-Oct-12_LMurray_S-Tub20min15uM_1-12mMMg.avi	disassembly	251.65	419.837	25.1902	12	15	20
2021-10-12	2021-Oct-12_LMurray_S-Tub20min15uM_1-12mMMg.avi	disassembly	246.17	410.694	24.6416	12	15	20
2021-10-12	2021-Oct-12_LMurray_S-Tub20min15uM_1-12mMMg.avi	disassembly	257.14	428.996	25.7397	12	15	20
2021-10-12	2021-Oct-12_LMurray_S-Tub20min15uM_1-12mMMg.avi	disassembly	223.65	373.123	22.3874	12	15	20
2021-10-12	2021-Oct-12_LMurray_S-Tub20min15uM_1-12mMMg.avi	disassembly	179.66	299.733	17.984	12	15	20
2021-10-12	2021-Oct-12_LMurray_S-Tub20min15uM_1-12mMMg.avi	disassembly	257.12	428.962	25.7377	12	15	20
2021-10-12	2021-Oct-12_LMurray_S-Tub20min15uM_1-12mMMg.avi	disassembly	214.56	357.958	21.4775	12	15	20
2021-10-12	2021-Oct-12_LMurray_S-Tub20min15uM_1-12mMMg.avi	disassembly	247.68	413.213	24.7928	12	15	20
2021-10-12	2021-Oct-12_LMurray_S-Tub20min15uM_1-12mMMg.avi	disassembly	279	465.465	27.9279	12	15	20
2021-10-12	2021-Oct-12_LMurray_S-Tub20min15uM_1-12mMMg.avi	disassembly	278.73	465.015	27.9009	12	15	20
2021-10-12	2021-Oct-12_LMurray_S-Tub20min15uM_1-12mMMg.avi	disassembly	132.44	220.954	13.2573	12	15	20
2021-10-12	2021-Oct-12_LMurray_S-Tub20min15uM_1-12mMMg.avi	disassembly	202.67	338.121	20.2873	12	15	20
2021-10-12	2021-Oct-12_LMurray_S-Tub20min15uM_1-12mMMg.avi	disassembly	235.12	392.259	23.5355	12	15	20
2021-10-12	2021-Oct-12_LMurray_S-Tub20min15uM_1-12mMMg.avi	disassembly	237.56	396.33	23.7798	12	15	20
2021-10-12	2021-Oct-12_LMurray_S-Tub20min15uM_1-12mMMg.avi	disassembly	182.36	304.238	18.2543	12	15	20
2021-10-12	2021-Oct-12_LMurray_S-Tub20min15uM_1-12mMMg.avi	disassembly	119.55	199.449	11.967	12	15	20
2021-10-12	2021-Oct-12_LMurray_S-Tub20min15uM_1-12mMMg.avi	disassembly	130.71	218.068	13.0841	12	15	20
2021-10-12	2021-Oct-12_LMurray_S-Tub20min15uM_1-12mMMg.avi	disassembly	249.56	416.35	24.981	12	15	20
2021-10-12	2021-Oct-12_LMurray_S-Tub20min15uM_1-12mMMg.avi	disassembly	218.53	364.581	21.8749	12	15	20
2021-10-12	2021-Oct-12_LMurray_S-Tub20min15uM_1-12mMMg.avi	disassembly	200.33	334.218	20.0531	12	15	20
2021-10-12	2021-Oct-12_LMurray_S-Tub20min15uM_1-12mMMg.avi	disassembly	212.56	354.621	21.2773	12	15	20
2021-10-12	2021-Oct-12_LMurray_S-Tub20min15uM_1-12mMMg.avi	disassembly	240.92	401.935	24.1161	12	15	20
2021-10-12	2021-Oct-12_LMurray_S-Tub20min15uM_1-12mMMg.avi	disassembly	216.94	361.929	21.7157	12	15	20
2021-10-13	2021-Oct-13_LMurray_S-Tub10min12uM_1-12mMMg.avi	disassembly	178.12	297.164	17.8298	1	12	10
2021-10-13	2021-Oct-13_LMurray_S-Tub10min12uM_1-12mMMg.avi	disassembly	155.09	258.742	15.5245	1	12	10
2021-10-13	2021-Oct-13_LMurray_S-Tub10min12uM_1-12mMMg.avi	disassembly	195.47	326.109	19.5666	1	12	10
2021-10-13	2021-Oct-13_LMurray_S-Tub10min12uM_1-12mMMg.avi	disassembly	199.48	332.799	19.968	1	12	10
2021-10-13	2021-Oct-13_LMurray_S-Tub10min12uM_1-12mMMg.avi	disassembly	160.15	267.184	16.031	1	12	10
2021-10-13	2021-Oct-13_LMurray_S-Tub10min12uM_1-12mMMg.avi	disassembly	218.04	363.764	21.8258	1	12	10
2021-10-13	2021-Oct-13_LMurray_S-Tub10min12uM_1-12mMMg.avi	disassembly	237.69	396.547	23.7928	1	12	10
2021-10-13	2021-Oct-13_LMurray_S-Tub10min12uM_1-12mMMg.avi	disassembly	165.66	276.376	16.5826	1	12	10
2021-10-13	2021-Oct-13_LMurray_S-Tub10min12uM_1-12mMMg.avi	disassembly	183.43	306.023	18.3614	1	12	10
2021-10-13	2021-Oct-13_LMurray_S-Tub10min12uM_1-12mMMg.avi	disassembly	124.9	208.375	12.5025	1	12	10
2021-10-13	2021-Oct-13_LMurray_S-Tub10min12uM_1-12mMMg.avi	disassembly	124.62	207.908	12.4745	1	12	10
2021-10-13	2021-Oct-13_LMurray_S-Tub10min12uM_1-12mMMg.avi	disassembly	181.35	302.553	18.1532	1	12	10
2021-10-13	2021-Oct-13_LMurray_S-Tub10min12uM_1-12mMMg.avi	disassembly	90.048	150.23	9.01381	1	12	10
2021-10-13	2021-Oct-13_LMurray_S-Tub10min12uM_1-12mMMg.avi	disassembly	84.277	140.602	8.43614	1	12	10
2021-10-13	2021-Oct-13_LMurray_S-Tub10min15-20uM_12-20mMMg.avi	disassembly	228.19	380.697	22.8418	12	15	10
2021-10-13	2021-Oct-13_LMurray_S-Tub10min15-20uM_12-20mMMg.avi	disassembly	230.5	384.551	23.0731	12	15	10
2021-10-13	2021-Oct-13_LMurray_S-Tub10min15-20uM_12-20mMMg.avi	disassembly	257.86	430.197	25.8118	12	15	10
2021-10-13	2021-Oct-13_LMurray_S-Tub10min15-20uM_12-20mMMg.avi	disassembly	203.21	339.022	20.3413	12	15	10
2021-10-13	2021-Oct-13_LMurray_S-Tub10min15-20uM_12-20mMMg.avi	disassembly	200.49	334.484	20.0691	12	15	10
2021-10-13	2021-Oct-13_LMurray_S-Tub10min15-20uM_12-20mMMg.avi	disassembly	230.14	383.951	23.037	12	15	10
2021-10-13	2021-Oct-13_LMurray_S-Tub10min15-20uM_12-20mMMg.avi	disassembly	195.41	326.009	19.5606	12	15	10
2021-10-13	2021-Oct-13_LMurray_S-Tub10min15-20uM_12-20mMMg.avi	disassembly	216.71	361.545	21.6927	12	15	10
2021-10-13	2021-Oct-13_LMurray_S-Tub10min15-20uM_12-20mMMg.avi	disassembly	220.71	368.218	22.0931	12	15	10
2021-10-13	2021-Oct-13_LMurray_S-Tub10min15-20uM_12-20mMMg.avi	disassembly	221.02	368.735	22.1241	12	15	10
2021-10-13	2021-Oct-13_LMurray_S-Tub10min15-20uM_12-20mMMg.avi	disassembly	218.15	363.947	21.8368	12	15	10
2021-10-13	2021-Oct-13_LMurray_S-Tub10min15-20uM_12-20mMMg.avi	disassembly	193.92	323.524	19.4114	12	15	10
2021-10-13	2021-Oct-13_LMurray_S-Tub10min15-20uM_12-20mMMg.avi	disassembly	185.27	309.092	18.5455	12	15	10
2021-10-13	2021-Oct-13_LMurray_S-Tub10min15-20uM_12-20mMMg.avi	disassembly	198.84	331.732	19.9039	12	15	10
2021-10-13	2021-Oct-13_LMurray_S-Tub10min15-20uM_12-20mMMg.avi	disassembly	235.27	392.509	23.5506	12	15	10
2021-10-13	2021-Oct-13_LMurray_S-Tub10min15-20uM_12-20mMMg.avi	disassembly	204.76	341.608	20.4965	12	15	10
2021-10-13	2021-Oct-13_LMurray_S-Tub10min15-20uM_12-20mMMg.avi	disassembly	228.59	381.365	22.8819	12	15	10
2021-10-13	2021-Oct-13_LMurray_S-Tub10min15-20uM_12-20mMMg.avi	disassembly	171.02	285.319	17.1191	12	15	10
2021-10-13	2021-Oct-13_LMurray_S-Tub10min15-20uM_12-20mMMg.avi	disassembly	208.34	347.581	20.8549	12	15	10
2021-10-13	2021-Oct-13_LMurray_S-Tub10min15-20uM_12-20mMMg.avi	disassembly	251.59	419.736	25.1842	12	15	10
2021-10-13	2021-Oct-13_LMurray_S-Tub10min15-20uM_12-20mMMg.avi	disassembly	222.85	371.788	22.3073	12	15	10
2021-10-13	2021-Oct-13_LMurray_S-Tub10min15-20uM_12-20mMMg.avi	disassembly	237.72	396.597	23.7958	12	15	10
2021-10-13	2021-Oct-13_LMurray_S-Tub10min15-20uM_12-20mMMg.avi	disassembly	232.02	387.087	23.2252	12	15	10
2021-10-13	2021-Oct-13_LMurray_S-Tub10min15-20uM_12-20mMMg.avi	disassembly	251.08	418.886	25.1331	12	15	10
2021-10-13	2021-Oct-13_LMurray_S-Tub10min15-20uM_12-20mMMg.avi	disassembly	183.73	306.523	18.3914	12	15	10
2021-10-13	2021-Oct-13_LMurray_S-Tub10min15-20uM_12-20mMMg.avi	disassembly	211.11	352.202	21.1321	12	15	10
2021-10-13	2021-Oct-13_LMurray_S-Tub10min15-20uM_12-20mMMg.avi	disassembly	207.42	346.046	20.7628	12	15	10
2021-10-13	2021-Oct-13_LMurray_S-Tub10min15-20uM_12-20mMMg.avi	disassembly	227.27	379.162	22.7497	12	15	10
2021-10-13	2021-Oct-13_LMurray_S-Tub10min15-20uM_12-20mMMg.avi	disassembly	221.07	368.819	22.1291	12	15	10
2021-10-13	2021-Oct-13_LMurray_S-Tub10min15-20uM_12-20mMMg.avi	disassembly	254.19	424.074	25.4444	12	15	10
2021-10-13	2021-Oct-13_LMurray_S-Tub10min15-20uM_12-20mMMg.avi	disassembly	200.28	334.134	20.048	20	20	10
2021-10-13	2021-Oct-13_LMurray_S-Tub10min15-20uM_12-20mMMg.avi	disassembly	207.79	346.663	20.7998	20	20	10
2021-10-13	2021-Oct-13_LMurray_S-Tub10min15-20uM_12-20mMMg.avi	disassembly	226.99	378.695	22.7217	20	20	10
2021-10-13	2021-Oct-13_LMurray_S-Tub10min15-20uM_12-20mMMg.avi	disassembly	260.8	435.102	26.1061	20	20	10
2021-10-13	2021-Oct-13_LMurray_S-Tub10min15-20uM_12-20mMMg.avi	disassembly	177.45	296.046	17.7628	20	20	10
2021-10-13	2021-Oct-13_LMurray_S-Tub10min15-20uM_12-20mMMg.avi	disassembly	127.01	211.895	12.7137	20	20	10
2021-10-13	2021-Oct-13_LMurray_S-Tub10min15-20uM_12-20mMMg.avi	disassembly	141.06	235.335	14.1201	20	20	10
2021-10-13	2021-Oct-13_LMurray_S-Tub10min15-20uM_12-20mMMg.avi	disassembly	179.99	300.284	18.017	20	20	10
2021-10-13	2021-Oct-13_LMurray_S-Tub10min15-20uM_12-20mMMg.avi	disassembly	204.98	341.975	20.5185	20	20	10
2021-10-13	2021-Oct-13_LMurray_S-Tub10min15-20uM_12-20mMMg.avi	disassembly	169.31	282.466	16.9479	20	20	10
2021-10-13	2021-Oct-13_LMurray_S-Tub10min15-20uM_12-20mMMg.avi	disassembly	190.73	318.202	19.0921	20	20	10
2021-10-13	2021-Oct-13_LMurray_S-Tub10min15-20uM_12-20mMMg.avi	disassembly	191.49	319.469	19.1682	20	20	10
2021-10-13	2021-Oct-13_LMurray_S-Tub10min15-20uM_12-20mMMg.avi	disassembly	241.15	402.319	24.1391	20	20	10
2021-10-13	2021-Oct-13_LMurray_S-Tub10min15-20uM_12-20mMMg.avi	disassembly	185.9	310.143	18.6086	20	20	10
2021-10-13	2021-Oct-13_LMurray_S-Tub10min15-20uM_12-20mMMg.avi	disassembly	225.75	376.627	22.5976	20	20	10
2021-10-13	2021-Oct-13_LMurray_S-Tub10min15-20uM_12-20mMMg.avi	disassembly	192.19	320.637	19.2382	20	20	10
2021-10-13	2021-Oct-13_LMurray_S-Tub10min15-20uM_12-20mMMg.avi	disassembly	250.36	417.684	25.0611	20	20	10
2021-10-13	2021-Oct-13_LMurray_S-Tub10min15-20uM_12-20mMMg.avi	disassembly	231.37	386.003	23.1602	20	20	10
2021-10-13	2021-Oct-13_LMurray_S-Tub10min15-20uM_12-20mMMg.avi	disassembly	161.15	268.852	16.1311	20	20	10
2021-10-13	2021-Oct-13_LMurray_S-Tub10min15-20uM_12-20mMMg.avi	disassembly	216.66	361.461	21.6877	20	20	10
2021-10-13	2021-Oct-13_LMurray_S-Tub10min15-20uM_12-20mMMg.avi	disassembly	244.3	407.574	24.4545	20	20	10
2021-10-13	2021-Oct-13_LMurray_S-Tub10min15-20uM_12-20mMMg.avi	disassembly	226.8	378.378	22.7027	20	20	10
2021-10-13	2021-Oct-13_LMurray_S-Tub10min15-20uM_12-20mMMg.avi	disassembly	134.76	224.825	13.4895	20	20	10
2021-10-13	2021-Oct-13_LMurray_S-Tub10min15-20uM_12-20mMMg.avi	disassembly	190.53	317.868	19.0721	20	20	10
2021-10-13	2021-Oct-13_LMurray_S-Tub10min15-20uM_12-20mMMg.avi	disassembly	211.47	352.803	21.1682	20	20	10
2021-10-19	21_1019_Ch01_19Oct2021Stub7p5min_mg6_12mM.avi	disassembly	139.17	232.182	13.9309	6	15	7.5
2021-10-19	21_1019_Ch01_19Oct2021Stub7p5min_mg6_12mM.avi	disassembly	170.06	283.717	17.023	6	15	7.5
2021-10-19	21_1019_Ch01_19Oct2021Stub7p5min_mg6_12mM.avi	disassembly	219.59	366.35	21.981	6	15	7.5
2021-10-19	21_1019_Ch01_19Oct2021Stub7p5min_mg6_12mM.avi	disassembly	306.05	510.594	30.6356	6	15	7.5
2021-10-19	21_1019_Ch01_19Oct2021Stub7p5min_mg6_12mM.avi	disassembly	201.59	336.32	20.1792	6	15	7.5
2021-10-19	21_1019_Ch01_19Oct2021Stub7p5min_mg6_12mM.avi	disassembly	232.76	388.322	23.2993	6	15	7.5
2021-10-19	21_1019_Ch01_19Oct2021Stub7p5min_mg6_12mM.avi	disassembly	223.45	372.789	22.3674	6	15	7.5
2021-10-19	21_1019_Ch01_19Oct2021Stub7p5min_mg6_12mM.avi	disassembly	194.85	325.075	19.5045	6	15	7.5
2021-10-19	21_1019_Ch01_19Oct2021Stub7p5min_mg6_12mM.avi	disassembly	249.6	416.416	24.985	6	15	7.5
2021-10-19	21_1019_Ch01_19Oct2021Stub7p5min_mg6_12mM.avi	disassembly	170.57	284.568	17.0741	12	15	7.5
2021-10-19	21_1019_Ch01_19Oct2021Stub7p5min_mg6_12mM.avi	disassembly	206.85	345.095	20.7057	12	15	7.5
2021-10-19	21_1019_Ch01_19Oct2021Stub7p5min_mg6_12mM.avi	disassembly	226.66	378.145	22.6887	12	15	7.5
2021-10-19	21_1019_Ch01_19Oct2021Stub7p5min_mg6_12mM.avi	disassembly	153.93	256.807	15.4084	12	15	7.5
2021-10-19	21_1019_Ch01_19Oct2021Stub7p5min_mg6_12mM.avi	disassembly	180.61	301.318	18.0791	12	15	7.5
2021-10-19	21_1019_Ch01_19Oct2021Stub7p5min_mg6_12mM.avi	disassembly	189.31	315.832	18.9499	12	15	7.5
2021-10-19	21_1019_Ch01_19Oct2021Stub7p5min_mg6_12mM.avi	disassembly	103	171.839	10.3103	12	15	7.5
2021-10-19	21_1019_Ch01_19Oct2021Stub7p5min_mg6_12mM.avi	disassembly	214.72	358.225	21.4935	12	15	7.5
2021-10-19	21_1019_Ch01_19Oct2021Stub7p5min_mg6_12mM.avi	disassembly	217.48	362.829	21.7698	12	15	7.5
2021-10-19	21_1019_Ch01_19Oct2021Stub7p5min_mg6_12mM.avi	disassembly	215.55	359.61	21.5766	12	15	7.5
2021-10-19	21_1019_Ch01_19Oct2021Stub7p5min_mg6_12mM.avi	disassembly	225.19	375.692	22.5415	12	15	7.5
2021-10-19	21_1019_Ch01_19Oct2021Stub7p5min_mg6_12mM.avi	disassembly	235.54	392.96	23.5776	12	15	7.5
2021-10-19	21_1019_Ch01_19Oct2021Stub7p5min_mg6_12mM.avi	disassembly	256.01	427.11	25.6266	12	15	7.5
2021-10-19	21_1019_Ch01_19Oct2021Stub7p5min_mg6_12mM.avi	disassembly	168.12	280.48	16.8288	12	15	7.5
2021-10-19	21_1019_Ch01_19Oct2021Stub7p5min_mg6_12mM.avi	disassembly	211.69	353.17	21.1902	12	15	7.5
2021-10-19	21_1019_Ch01_19Oct2021Stub7p5min_mg6_12mM.avi	disassembly	201.57	336.286	20.1772	12	15	7.5
2021-10-19	21_1019_Ch01_19Oct2021Stub7p5min_mg6_12mM.avi	disassembly	246.45	411.161	24.6697	12	15	7.5
2021-10-19	21_1019_Ch01_19Oct2021Stub7p5min_mg6_12mM.avi	disassembly	218.22	364.064	21.8438	12	15	7.5
2021-10-19	21_1019_Ch01_19Oct2021Stub7p5min_mg6_12mM.avi	disassembly	230.7	384.885	23.0931	12	15	7.5
